# Supplementary material for: Evaluation of a knowledge translation strategy to improve policymaking and practices in health promotion and disease prevention setting in French regions: TC-REG, a realist study
Source: PubMed Central journal article supplement — BMJ Open. 2021 Sep 30;11(9):e045936. doi: 10.1136/bmjopen-2020-045936 (PMC8487168; doi:10.1136/bmjopen-2020-045936), 2021-09-30
Supplement: bmjopen-2020-045936.draft_revisions.pdf [file bmjopen-2020-045936.draft_revisions.pdf]

# BMJ Open

BMJ Open is committed to open peer review. As part of this commitment we make the peer review history of every article we publish publicly available.

When an article is published we post the peer reviewers' comments and the authors' responses online. We also post the versions of the paper that were used during peer review. These are the versions that the peer review comments apply to.

The versions of the paper that follow are the versions that were submitted during the peer review process. They are not the versions of record or the final published versions. They should not be cited or distributed as the published version of this manuscript.

BMJ Open is an open access journal and the full, final, typeset and author-corrected version of record of the manuscript is available on our site with no access controls, subscription charges or pay-per-view fees (<http://bmjopen.bmj.com>).

If you have any questions on BMJ Open's open peer review process please email [info.bmjopen@bmj.com](mailto:info.bmjopen@bmj.com)

# BMJ Open

## Evaluation of a knowledge translation strategy to improve policy making and practices in health promotion and disease prevention setting in French regions: TC-REG, a realist study

|                               |                                                                                                                                                                                                                                                                                                                                                                                                                                                                                                                                                                                                                                                                                                                                                                                                                                                                                   |
|-------------------------------|-----------------------------------------------------------------------------------------------------------------------------------------------------------------------------------------------------------------------------------------------------------------------------------------------------------------------------------------------------------------------------------------------------------------------------------------------------------------------------------------------------------------------------------------------------------------------------------------------------------------------------------------------------------------------------------------------------------------------------------------------------------------------------------------------------------------------------------------------------------------------------------|
| Journal:                      | <i>BMJ Open</i>                                                                                                                                                                                                                                                                                                                                                                                                                                                                                                                                                                                                                                                                                                                                                                                                                                                                   |
| Manuscript ID                 | bmjopen-2020-045936                                                                                                                                                                                                                                                                                                                                                                                                                                                                                                                                                                                                                                                                                                                                                                                                                                                               |
| Article Type:                 | Original research                                                                                                                                                                                                                                                                                                                                                                                                                                                                                                                                                                                                                                                                                                                                                                                                                                                                 |
| Date Submitted by the Author: | 20-Oct-2020                                                                                                                                                                                                                                                                                                                                                                                                                                                                                                                                                                                                                                                                                                                                                                                                                                                                       |
| Complete List of Authors:     | Martin-Fernandez, Judith; INSERM Bordeaux Population Health Research Center, UMR 1219, CIC1401-EC,, University of Bordeaux, ISPED,; CHU de Bordeaux<br>Aromatario, Olivier ; ISPED, University of Bordeaux; INSERM Bordeaux Population Health Research Center, UMR 1219, CIC1401-EC,, University of Bordeaux, ISPED,<br>Prigent, Ollivier; INSERM Bordeaux Population Health Research Center, UMR 1219, CIC1401-EC,, University of Bordeaux, ISPED,; ISPED, University of Bordeaux<br>Porcherie, Marion; Ecole des Hautes Etudes en Sante Publique, Sciences Humaines et Sociales UMR CNRS 6051<br>Ridde, Valéry ; CEPED, Institute for Research on Sustainable Development, IRD-Université de Paris, ERL INSERM SAGESUD<br>Cambon, Linda; ISPED, Chaire de prévention ; INSERM Bordeaux Population Health Research Center, UMR 1219, CIC1401-EC,, University of Bordeaux, ISPED, |
| Keywords:                     | PUBLIC HEALTH, Organisation of health services < HEALTH SERVICES ADMINISTRATION & MANAGEMENT, Change management < HEALTH SERVICES ADMINISTRATION & MANAGEMENT                                                                                                                                                                                                                                                                                                                                                                                                                                                                                                                                                                                                                                                                                                                     |
|                               |                                                                                                                                                                                                                                                                                                                                                                                                                                                                                                                                                                                                                                                                                                                                                                                                                                                                                   |

SCHOLARONE™  
Manuscripts

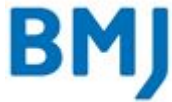

I, the Submitting Author has the right to grant and does grant on behalf of all authors of the Work (as defined in the below author licence), an exclusive licence and/or a non-exclusive licence for contributions from authors who are: i) UK Crown employees; ii) where BMJ has agreed a CC-BY licence shall apply, and/or iii) in accordance with the terms applicable for US Federal Government officers or employees acting as part of their official duties; on a worldwide, perpetual, irrevocable, royalty-free basis to BMJ Publishing Group Ltd ("BMJ") its licensees and where the relevant Journal is co-owned by BMJ to the co-owners of the Journal, to publish the Work in this journal and any other BMJ products and to exploit all rights, as set out in our [licence](#).

The Submitting Author accepts and understands that any supply made under these terms is made by BMJ to the Submitting Author unless you are acting as an employee on behalf of your employer or a postgraduate student of an affiliated institution which is paying any applicable article publishing charge ("APC") for Open Access articles. Where the Submitting Author wishes to make the Work available on an Open Access basis (and intends to pay the relevant APC), the terms of reuse of such Open Access shall be governed by a Creative Commons licence – details of these licences and which [Creative Commons](#) licence will apply to this Work are set out in our licence referred to above.

Other than as permitted in any relevant BMJ Author's Self Archiving Policies, I confirm this Work has not been accepted for publication elsewhere, is not being considered for publication elsewhere and does not duplicate material already published. I confirm all authors consent to publication of this Work and authorise the granting of this licence.

1  
2  
3  
4  
5  
6  
7  
8  
9  
10  
11  
12  
13  
14  
15  
16  
17  
18  
19  
20  
21  
22  
23  
24  
25  
26  
27  
28  
29  
30  
31  
32  
33  
34  
35  
36  
37  
38  
39  
40  
41  
42  
43  
44  
45  
46  
47  
48  
49  
50  
51  
52  
53  
54  
55  
56  
57  
58  
59  
60

# Evaluation of a knowledge translation strategy to improve policy making and practices in health promotion and disease prevention setting in French regions: TC-REG, a realist study

<sup>1,2,3</sup> Judith Martin-Fernandez, <sup>1,2</sup> Olivier Aromatario, <sup>1,2</sup> Ollivier Prigent, <sup>4</sup>Marion Porcherie, <sup>5</sup>Valery Ridde, <sup>1,2,6</sup> Linda Cambon.

<sup>1</sup> INSERM Bordeaux Population Health Research Center, UMR 1219, CIC1401-EC, University of Bordeaux, ISPED, 33000, Bordeaux, France.

<sup>2</sup> University of Bordeaux, ISPED, F-33000 Bordeaux, France

<sup>3</sup> CHU, Bordeaux, France

<sup>4</sup>Arènes-Rennes 1 UMR CNRS 6051, EHESP, Rennes, France

<sup>5</sup>CEPED, Institute for Research on Sustainable Development, IRD-Université de Paris, ERL INSERM SAGESUD, Paris, France.

<sup>6</sup> Chaire de prévention ISPED/SPF, Université de Bordeaux, Bordeaux, France

“Corresponding author :

Judith Martin-Fernandez : [judith.martin-fernandez@u-bordeaux.fr](mailto:judith.martin-fernandez@u-bordeaux.fr)

## Abstract :

**Objective :** This paper presents the results of a realist evaluation of knowledge translation (KT) strategies implemented in the field of cancer prevention at the local level in France.

**Design :** Realist evaluation study.

**Setting :** The target population comprised decision makers and field professionals working in prevention and public health services operating in regions of France (i.e., ARS, IREPS, and their partners).

**Participants :** This evaluation collected data from 2 seminars, 82 interviews, 18 observations, and 4 focus groups over 18 months.

**Intervention :** the TC-REG project combined various activities: Supporting access to and adaptation of usable evidence, Strengthening professionals' skills in analyzing, adopting, and using the policy briefs, Facilitating the use of evidence in organizations and processes. TC-REG project aimed to evaluate the impact of a support KT process for the use of evidence in cancer prevention concerning the modification of decisions and preventive practices, depending on the authorities in four regions of France.

**Results :** Collected data allowed to define the configurational recurrences sought at the respondent level, at the regional level, and at the inter-region level. From these raw results eight final refined middle-range theories were defined. Organized around the mechanisms to be activated, these middle-range theories illustrate how to activate it and under what conditions. These analyses provided a basis for the production of seven operational and contextualized recommendations to develop KT to inform regional policy-making regarding health promotion and disease prevention.

**Conclusion :** The results obtained from the analyses led us to formulate two perspectives of an operational nature for the benefit of those involved in prevention and health promotion.

1  
2  
3 **Ethics and dissemination:** This study has received approval from the national agency for data  
4 protection *Commission Nationale Informatique et Libertés* (NS no. 43, registered under number  
5 2028640 v 0).  
6  
7  
8  
9  
10  
11  
12  
13  
14  
15  
16  
17  
18  
19  
20  
21  
22  
23  
24  
25  
26  
27  
28  
29  
30  
31  
32  
33  
34  
35  
36  
37  
38  
39  
40  
41  
42  
43  
44  
45  
46  
47  
48  
49  
50  
51  
52  
53  
54  
55  
56  
57  
58  
59  
60

For peer review only

## Strengths and limitations of this study'

- The large amount of qualitative data allowed us to create a knowledge translation taxonomy and to develop eight middle-range theories illustrating how to activate mechanisms and under what conditions.
- This study provided a basis for the production of seven operational and contextualized recommendations to develop knowledge translation (KT) to inform regional policy-making regarding health promotion and disease prevention.
- The results obtained from the analyses described here led us to formulate two perspectives of an operational nature for the benefit of those involved in prevention and health promotion

KEYWORDS : Knowledge transfer; Realist evaluation; France; Prevention; Public health, Cancer

## Funding statement

This research has received funding from the IRESP *via* a national competitive peer review grant application process “2016 General Call for projects- Prevention field” (No. CAMBON-17II015-00).

## Competing interests

The authors declare that they have no competing interests.

**Words count:** 5642

## Introduction

Evidence-based decision-making and practice are major issues in public health. For researchers, this means looking ahead to the dissemination of findings and integrating different types of knowledge and decision-making challenges [1]. It also implies a need for greater collaboration between the research community and decision-makers [2]. Even if decision-makers, stakeholders, and researchers mostly agree that it is necessary to move forward with evidence-informed practices and policy-making, some barriers persist related to people, organizations, contexts, and evidence's attributes [3–5]. Gervais et al. [3,6] suggested that KT research concerning decision-making processes offers multiple explanatory factors, which can be classified in three categories. The first category relates to the specific properties of the evidence itself: nature, availability, accessibility, quality and credibility, intelligibility, ability to meet needs, adaptability, and transferability [6]. The second category relates to the characteristics of decision-makers: beliefs or personal values, political leanings, sociodemographic characteristics, level of education, previous experiences, motivation, and ability to interpret data. These characteristics may influence how new knowledge is addressed during the decision-making process [7]. The third category relates to the characteristics of the organizations and local contexts in which knowledge producers and users perform their work [3]: openness to change; material, human, and financial resources available for KT; social and political context in the external environment; style of management; leadership; staffing; and stakeholder coalitions. Multiple barriers to the adoption of evidence in the field of public health underline the nonlinear process between knowledge production and knowledge use. These barriers prevent optimal production and use of evidence. To address this, it is necessary to assess how



1  
2  
3 knowledge is produced and used; to enhance the understanding of decision-making processes  
4 and mechanisms; and to examine the abilities of public health services to integrate research  
5 findings into their decisions and operations. This assessment requires a systematic approach  
6 that includes the adaptation of scientific knowledge; the abilities of users to capture, understand,  
7 and apply available evidence; and the presence of an organizational and supportive culture for  
8 use of this evidence. These are the major challenges of knowledge translation (KT)[8], defined  
9 as “the group of activities and interaction mechanisms that foster the dissemination, adoption  
10 and appropriation of the most up-to-date knowledge possible for use in professional practice  
11 and in healthcare management” [9].  
12  
13  
14  
15  
16  
17  
18  
19  
20  
21  
22

23  
24 Over the past several decades, a growing body of literature has been published regarding KT  
25 [8,10,11]. Facilitators and barriers related to KT have been studied in several contexts [12–14];  
26 several KT frameworks that provide a mapping of KT processes have been described [15].  
27 Although these frameworks are helpful for understanding the key elements involved in KT,  
28 they lack consistency regarding implementation of KT schemes in local contexts because they  
29 provide broad concepts without concrete examples of KT activities to implement. The literature  
30 highlights the insufficient dissemination of scientific knowledge [16–20]; it also emphasizes  
31 that, to be effective, KT modalities must be contextualized to the environment in which  
32 knowledge dissemination is required. Thus, the effectiveness of KT strategies depends on the  
33 context in which they are implemented [8,21–24]. The contextualization of KT strategies is  
34 therefore necessary to remove barriers to knowledge use.  
35  
36  
37  
38  
39  
40  
41  
42  
43  
44  
45  
46  
47  
48  
49

50 This paper presents the results of a realist evaluation study of KT strategies implemented in the  
51 field of health promotion and prevention disease at the local level in France. The aim of the TC-  
52  
53  
54

1  
2  
3 REG (i.e. “Transfert de Connaissances en REGion”) study was to evaluate the impact of a  
4 support process for the use of evidence in cancer prevention to influence the decisions and  
5 preventive practices in four regions of France. This study documented the mechanisms,  
6  
7  
8 preventive practices in four regions of France. This study documented the mechanisms,  
9  
10 processes, the configurations (i.e., Contexts/Mechanisms/Outcomes [CMOs]) [25] and the  
11  
12 conditions of effectiveness established as a result of this support to ensure KT.  
13  
14

15 RAMESES II reporting standards for realist evaluations were used [26].  
16  
17

## 18 **Methods/design**

### 19 *Theoretical framework*

20  
21  
22  
23 The realist approach [25] is increasingly used for appraising the interactions among an  
24 intervention, its mechanisms, and its contexts. The overall aim is to achieve a better  
25 understanding of an intervention’s success factors and how these may be replicated in other  
26 contexts. In realist evaluation, developed by Pawson and Tilley [25], the effectiveness of the  
27 intervention depends on the underlying mechanisms that contribute within a given context.  
28  
29 Realist evaluation involves identification of CMO configurations. The aim comprises  
30 understanding how and why an intervention works. A middle-range theory (i.e., a theory aimed  
31 toward describing interactions among outcomes, mechanisms, and contexts and therefore CMO  
32 configurations) is established to highlight the mutual influences of intervention and context  
33 [27,28]. This approach is linked to the black box paradigm [29] and differs from the  
34 experimental paradigm, which evaluates effectiveness without analysis of the mechanism by  
35 which an intervention is successful, as well as without the influence of context. Realist  
36  
37 evaluation determines whether an intervention worked in a manner consistent with its  
38  
39  
40  
41  
42  
43  
44  
45  
46  
47  
48  
49  
50  
51  
52  
53  
54  
55

1  
2  
3 underpinning theory. The generative causality works via three assumptions [30]: i) an  
4 intervention is not successful in isolate, and is not the source of a given outcome; ii) all  
5 interventions trigger a mechanism or a set of mechanisms that produce an outcome; and iii) all  
6 interventions are delivered within specific contexts.  
7  
8  
9  
10

11  
12 Hence, realist evaluation involves identification of middle-range theories. Hypothesized and  
13 validated by empirical investigations, these CMO configurations help to understand how an  
14 intervention causes change, considering both context and target group [27,28]. The recurrence  
15 of CMOs is observed in successive case studies [28]. To consider context, realist evaluators  
16 observe successive cases, which Lawson (quoted by Pawson in 2006 [30]) has described as  
17 “demi-regularities of CMOs” (i.e., regular, not necessarily permanent occurrences of an  
18 outcome when an intervention triggers one or more mechanisms in a given context) [28].  
19 Analysis of these recurrences in different contexts allows the isolation of key elements that can  
20 be replicated in a family of contexts. This yields middle-range theories that become increasingly  
21 robust with progression among cases. “These middle-range theories, in certain conditions,  
22 predict possible intervention outcomes in contexts different from the one in which the  
23 intervention was tested” [28,31].  
24  
25  
26  
27  
28  
29  
30  
31  
32  
33  
34  
35  
36  
37  
38  
39  
40

### 41 *Applied to our case*

42  
43  
44 As the realist principle is suitable for studying non-linear interactions in complex systems, we  
45 adopted this approach [32]. In our study, each region involved in the TC-REG project, with its  
46 own context, constituted a case. For each case, the intervention was studied to identify  
47 contributory mechanisms in a given context, along with the variation in outcomes. CMO  
48 configurations were identified through analyses of successive cases. A cross-case analysis was  
49  
50  
51  
52  
53  
54  
55  
56  
57  
58  
59  
60

1  
2  
3 performed to highlight recurrent CMO configurations and thus identify key features for possible  
4  
5 replication.  
6  
7

8 Drawing on the literature and experience of professionals locally involved in the TC-REG  
9  
10 project, initial middle-range theories were established [25,30], then tested in each case (i.e.,  
11  
12 region) through collection of qualitative data [28].  
13  
14

15 Mechanisms were identified qualitatively, in accordance with the definition of Ridde et al.: “a  
16  
17 mechanism is an element of reasoning and reaction of an agent with regard to an intervention  
18  
19 productive of an outcome in a given context” [33,34], and in accordance with the definition of  
20  
21 Cambon et al.: “What characterizes and punctuates the process of change and hence, the  
22  
23 production of outcomes”[35].  
24  
25  
26

27  
28 In a realist approach, interventional elements contribute to the context. Contextual elements  
29  
30 have been included among all elements collected qualitatively that satisfy the following  
31  
32 definition: elements located in time and space that may affect the intervention and the outcomes  
33  
34 produced. Therefore, this study distinguished between Ci (for contextual factors linked to the  
35  
36 intervention) and Ce (for external contextual factors that are not linked to the intervention).  
37  
38  
39

### 40 41 ***Population*** 42 43

44 This study was conducted in four regions of France<sup>1</sup> and within different types of organizations  
45  
46 and their partners: regional health agencies (ARS<sup>2</sup>), which are responsible for policy-making  
47  
48  
49  
50  
51

---

52  
53 <sup>1</sup> Paca, Brittany, Martinique, Normandy

54 <sup>2</sup> Agence Régionale de Santé : regional health agency  
55

1  
2  
3 and prevention policies; and non-profit organizations (IREPS<sup>3</sup>). IREPS develop health  
4 promotion and prevention programs; they also provide methodological supports to field  
5 professionals for the implementation of prevention interventions in different settings (e.g.,  
6 workplaces, schools, care settings, recreation and community centers, and rural or urban areas).  
7  
8 ARS and IREPS work collaboratively to implement prevention and health policies in local  
9 contexts.

10  
11  
12 This study focused on stakeholders who agreed to implement TC-REG in the 4 regions. The  
13 sample of this study is composed of :

- 24 • ARS public health professionals: five agents per region (deputy directors in charge of  
25 prevention, heads of strategy departments, and project managers);
- 26 • IREPS professionals: 10 people per region (directors, project managers, and  
27 communication managers);
- 28 • Members of specialized prevention commissions within the Regional Conferences on  
29 Health and Autonomy and members of the Public Policy Coordination Commission,  
30 both dedicated to prevention in various regions of France (five people) and partners of  
31 IREPS and ARS.

32  
33  
34  
35  
36  
37 These 65 persons will be named TC-REG project manager in this article.

### 38 39 ***Patient and Public Involvement***

40  
41  
42  
43 The TC-REG study does not include any patient or public involvement in terms of setting  
44 research priorities, defining research questions or outcomes, providing input into the study  
45 design, or disseminating the results. The research participants answered interviews.  
46  
47  
48  
49  
50  
51

---

52  
53  
54 <sup>3</sup> Instance Régionale d'Education et de Promotion de la Santé pour tous : Regional organization for health  
55 promotion and education

## Intervention

The intervention is a knowledge translation plan implemented differently in each region. It was elaborated through a collaborative process combining : i) literature analyses, especially the recent literature like the report entitled "The science of using science: researching the use of research evidence in decision-making" [2]; and ii) workshops gathering stakeholders from the IREPS and ARS (20 people). Its aim was to collectively become acquainted with and master the concept of KT, identify effective strategies highlighted in the literature and their conditions of transferability, and define the middle-range theory supporting the study and the intervention theories of each region to implement the KT. This seminar also enabled a consensus definition of the initial middle-range theory (C/M/O)

Box 1: The TC-REG Initial middle-range theory).

Box 1: The TC-REG Initial middle-range theory

### ***Initial middle-range theory***

“The modalities of an effective knowledge transfer scheme combine levers that:

- promote access to information and an adaptation of it (Ci)\*,
- promote the development of capacities to understand and use them (Ci)\*,
- allow the modification of organizational processes (Ci)\* in order to facilitate their production and their appropriation in practice settings.

These modalities of KT produce an increasing use of scientific knowledge (O)\*\*\* by reinforcing:

- the perception of their usefulness (M)\*\*,
- the motivation to use them (M)\*\*,
- the ability to adapt them to the issues present in practical settings (M)\*\*".

\*Ci=contextual factors linked to the intervention

\*\*M= Mechanism

\*\*\*O= Outcome

At this point, no contextual factors were identified, because there was no consensus on this topic among participants. This process was described in the published study protocol [36].

These KT plans were implemented in the 4 regions over a 12-month period. Each KT plan aims

1  
2  
3 to improve the use of Evidence-based prevention intervention synthesis (SIPREV) realized by  
4 the research team in partnership with the International Union for Health Promotion and  
5 Education. The SIPREV consist of six summaries of systematic reviews concerning: nutrition,  
6 alcohol, tobacco smoking, physical activity, emotional and sexual life, and psychosocial skills.  
7  
8 These summaries present effective prevention practices. These documents were distributed in  
9  
10 the four regions in September 2018.  
11  
12  
13  
14  
15  
16

17 In each of the 4 regions the following categories of activities were combined : i) Supporting  
18 access to and adaptation of scientific and usable evidence, especially policy briefs, ii)  
19 Strengthening professionals' skills in analyzing, adopting, and using the policy briefs in the  
20 course of their practices and decision-making processes (e.g., training, journal club, and  
21 tutoring); iii) Facilitating the use of evidence in organizations and processes (e.g., collaborative  
22 workshops, normative processes, and incentives). The detailed activities implemented in  
23 regions and corresponding to these operational objectives have been transcribed into a  
24 standardized taxonomy published by Affret et al. [37].  
25  
26  
27  
28  
29  
30  
31  
32  
33  
34  
35  
36

### 37 ***Data collection***

38  
39  
40 This study alternated between theoretical and empirical stages. Data collection consisted of  
41 qualitative investigations through interviews and observations. The results were discussed and  
42 enriched during a seminar on 18 October 2019 with the TC-REG project manager of the four  
43 regions involved. More details regarding this study are available in the published study protocol  
44  
45  
46  
47  
48  
49 [36].  
50  
51  
52  
53  
54  
55  
56  
57  
58  
59  
60

1  
2  
3 Based on the middle-range theory (developed during the seminar in May 2017) and to collect  
4  
5 CMOs related to the realist analysis, three series of interviews and one series of observations  
6  
7 were conducted.  
8  
9

10 The first round of non-directive interviews aimed to specify, with reference to the initial middle-  
11  
12 range theory, the potential mechanisms to be activated and the external contextual elements (so-  
13  
14 called Ce) missing in our initial intervention theory. Thirty-six face to face interviews were  
15  
16 conducted in October/November 2017, which led to the identification of several contexts and  
17  
18 mechanisms (see Table 1: Objective, data, and qualitative investigation methods for details).  
19  
20  
21  
22  
23  
24  
25  
26  
27  
28  
29  
30  
31  
32  
33  
34  
35  
36  
37  
38  
39  
40  
41  
42  
43  
44  
45  
46  
47  
48  
49  
50  
51  
52  
53  
54  
55  
56  
57  
58  
59  
60



1  
2  
3  
4  
5  
6  
7  
8  
9  
10  
11  
12  
13  
14  
15  
16  
17  
18  
19  
20  
21  
22  
23  
24  
25  
26  
27  
28  
29  
30  
31  
32  
33  
34  
35  
36  
37  
38  
39  
40  
41  
42  
43  
44  
45  
46

Table 1: Objective, data, and qualitative investigation methods

| Round                          | Objective                                                                                                                                                  | Methods                                                                                                                                                                             | Sample                                                                                                                           | Data collected                                                                                                                                                                                                                                                                                                                                                                                                                            | Timeframe             |
|--------------------------------|------------------------------------------------------------------------------------------------------------------------------------------------------------|-------------------------------------------------------------------------------------------------------------------------------------------------------------------------------------|----------------------------------------------------------------------------------------------------------------------------------|-------------------------------------------------------------------------------------------------------------------------------------------------------------------------------------------------------------------------------------------------------------------------------------------------------------------------------------------------------------------------------------------------------------------------------------------|-----------------------|
| <b>1st round of interviews</b> | Specify, with reference to initial middle-range theory, mechanisms to be potentially activated, as well as contextual elements (missing in initial theory) | Nondirective interviews:<br>Q1: What do you think about the use of data from science and what do you put in this category?<br>Q2: Has this idea evolved?<br>Q3: How has it evolved? | 36 interviews with TC-REG project managers in these regions :<br>- Brittany: 8<br>- Martinique: 12<br>- Normandy: 9<br>- PACA: 7 | <b>M: Mechanisms</b><br>Three mechanisms identified in initial middle-range theory:<br>- Perception of usefulness (instrumental utility, conceptual utility, strategic utility)<br>- Perception of abilities to use middle-range theory: knowledge, experience, capability (psychosocial skills)<br>- Perception of motivation<br><br><b>Ce: Contextual elements related to:</b><br>People:<br>-Initial training: school career, level of | October/November 2017 |

|                     |                                                                                                             |                                            |                                                                                                                                                                                                                              |                                                                                                                                                                                                                                                                                                                                                                                                                                                                                                                                         |                           |
|---------------------|-------------------------------------------------------------------------------------------------------------|--------------------------------------------|------------------------------------------------------------------------------------------------------------------------------------------------------------------------------------------------------------------------------|-----------------------------------------------------------------------------------------------------------------------------------------------------------------------------------------------------------------------------------------------------------------------------------------------------------------------------------------------------------------------------------------------------------------------------------------------------------------------------------------------------------------------------------------|---------------------------|
|                     |                                                                                                             | Q4: How do you explain these developments? |                                                                                                                                                                                                                              | <ul style="list-style-type: none"> <li>- Work experience</li> <li>- Age and years of experience in office</li> <li>- Continuing education on data/research</li> </ul>                                                                                                                                                                                                                                                                                                                                                                   |                           |
| <b>Observations</b> | Identify local contextual elements and mechanisms activated by use of evidence-based data (SIPREV or other) | Nonparticipating observations              | 18 observations: <ul style="list-style-type: none"> <li>- Brittany (<math>n = 1</math>)</li> <li>- Martinique (<math>n = 2</math>)</li> <li>- Normandy (<math>n = 12</math>)</li> <li>- PACA (<math>n = 3</math>)</li> </ul> | <ul style="list-style-type: none"> <li>- Awareness</li> <li>- Leadership Organization</li> <li>- Instituted modalities of the use of scientific data</li> <li>- Material resources: databases, magazine package, newsletter, mailing lists</li> <li>- Human resources: staff who can help to find, interpret, and use the results of the research (e.g., training)</li> <li>- Prior partnership with researchers/universities</li> <li>- Dedicated spaces/moments for communication with partners (e.g., meetings, seminars)</li> </ul> | Throughout TC-REG project |

1  
2  
3  
4  
5  
6  
7  
8  
9  
10  
11  
12  
13  
14  
15  
16  
17  
18  
19  
20  
21  
22  
23  
24  
25  
26  
27  
28  
29  
30  
31  
32  
33  
34  
35  
36  
37  
38  
39  
40  
41  
42  
43  
44  
45  
46

|                                           |                                                                                                      |                                                     |                                                                                                                                                                                                                                                                   |                                                                                                                                                                                                                                     |                      |
|-------------------------------------------|------------------------------------------------------------------------------------------------------|-----------------------------------------------------|-------------------------------------------------------------------------------------------------------------------------------------------------------------------------------------------------------------------------------------------------------------------|-------------------------------------------------------------------------------------------------------------------------------------------------------------------------------------------------------------------------------------|----------------------|
|                                           |                                                                                                      |                                                     |                                                                                                                                                                                                                                                                   | <ul style="list-style-type: none"> <li>- External factors (e.g., PRC, PRS, Ministry)</li> <li>- Political impulse</li> </ul>                                                                                                        |                      |
| <b>2<sup>nd</sup> round of interviews</b> | Identify KT activities currently carried out among regions to determine taxonomy enabling comparison | Semi-directive interviews and regional focus groups | 10 interviews with TC-REG project managers in these regions: <ul style="list-style-type: none"> <li>- Brittany <i>n</i> = 2</li> <li>- Martinique <i>n</i> = 2</li> <li>- Normandy <i>n</i> = 3</li> <li>- PACA <i>n</i> = 3</li> </ul> 4 focus groups (1/region) | <b>Ci:</b> Determine KT activities carried out among regions according to transfer plan defined in August 2017. Activities were then labeled to determine Cis                                                                       | February/August 2018 |
| <b>3<sup>rd</sup> round of interviews</b> | Identify <b>Ci-Ce-M-O</b> configurations in IG                                                       | Semi-directive interviews                           | 36 interviews with TC-REG project managers in these regions: <ul style="list-style-type: none"> <li>- Brittany: 7</li> <li>- Martinique: 10</li> <li>- Normandy: 10</li> </ul>                                                                                    | <b>Ci-Ce-M-O configurations:</b> i.e., answer to this question: through which mechanism(s) does the increased use of evidence take place and what activities and contextual circumstances can influence it? A reminder was made for | April/June 2019      |

|  |  |  |         |                                                                                                 |  |
|--|--|--|---------|-------------------------------------------------------------------------------------------------|--|
|  |  |  | PACA: 9 | each mechanism identified after the first round (leaving the possibility of mentioning others). |  |
|--|--|--|---------|-------------------------------------------------------------------------------------------------|--|

For peer review only

1  
2  
3 In the second round, the interviews were semi-directive and aimed to identify KT activities (so-  
4 called Ci) actually carried out in the regions, thereby determining a taxonomy that would enable  
5 them to be compared among regions. Ten semi-directive face to face interviews with the TC-  
6 REG project managers in the regions and four focus groups were conducted between February  
7 2018 and August 2018. This round of data collection allowed precise determination of KT  
8 activities carried out in the regions, in accordance with the KT plan defined in August 2017, as  
9 well as collection of Cis. More details have been described in Affret et al [37].

10  
11  
12  
13  
14  
15  
16  
17  
18  
19  
20 The third round of interviews aimed to identify CeCiMO configurations. In total, thirty-six  
21 semi-directive telephone interviews were conducted between April and June 2019.

22  
23  
24  
25 For all interviews, professionals were selected according to the following criteria: i)  
26 Participation in TC-REG study ; ii) Agreement to participate in the interviews; iii) Agreement  
27 with this use of the data extracted from the interviews ; iv) Diversity among institutes and  
28 professions (i.e., managerial and non-executive positions).

29  
30  
31  
32  
33  
34  
35 The observations aimed to identify local contextual elements (Ce) and mechanisms (M)  
36 activated by the use of evidence-based data (evidence-based prevention intervention synthesis  
37 or other). Eighteen observations were conducted during the TC-REG project (Table  
38 1:Objective, data, and qualitative investigation methods).

## Data analysis

Collected data were coded and analyzed with NVivo® software. Because the three series of interviews and the single set of observations comprised different types of information, they helped to iteratively establish information regarding CMO configurations at stake. The data were analyzed by two researchers (LC et OA), then compared and reanalyzed to reach a consensus between the two. Data were coded to identify different levels of information. A first level of coding and analysis was used to identify and separate: i) favorable/unfavorable contexts element to use scientific data, especially the data in SIPREV (Ce), ii) arguments evocated by the panel pro or cons the use of scientific data (foreshadowing the mechanisms to be activated, M). Then, a second, more detailed level of coding allowed specification of the Ce and M to be activated in the use of scientific knowledge.

The second round of interviews allowed the research team to identify a list of KT activities carried out in the four regions. This list was presented at the 2nd steering committee meeting on 13 February 2019 to establish consensus regarding the wording of the activities. Thus, 18 distinct KT actions were identified; these were grouped into 11 strategic categories, thus constituting a taxonomy. The elaboration of a standardize taxonomy helped us to use the same definition of the same activity in the third analysis described next. This specific work is published elsewhere [37].

The third round of reviews allowed the researchers to identify the CeCiMO. For each mechanism (those identified following the second round of interviews or newly cited) cited by each professional as having evolved, the content analysis focused on the activities and

1  
2  
3 contextual elements that had enabled its evolution. The analysis was therefore based on 3 nodes  
4 of analysis: 1) which mechanisms activated by the KT plan, 2) for each mechanism, which  
5 activity of the KT plan influenced (based on the KT taxonomy evocated before) it, 3) for each  
6 activity, which element of the context influenced it (in the list elaborated after the 1<sup>st</sup> round of  
7 interviews or newly evocated). This analyze allowed to determine a list of different CeCIMOs,  
8 by region (the four) or by types of respondent (policymakers or field professionals). We then  
9 carried out a transversal analysis of the different CeCiMOs in order to define the configurational  
10 recurrences or semi-regularities (i.e. the repetitive CeCiMO) according this rule: activities [Ci]  
11 in which association frequency with mechanisms [M] was higher than the average of the  
12 associations; contexts [Ce] in which association frequency with mechanisms [M] AND with  
13 activities [Ci] was higher than the average of the associations. This allows us to produce a  
14 shared list of interregional (most generalizable) CeCIMOs.  
15  
16  
17  
18  
19  
20  
21  
22  
23  
24  
25  
26  
27  
28  
29

30  
31 The results of the analysis of the series 2 and series 3 interviews were discussed during a  
32 seminar on 18 October 2019, which brought together two people per ARS and IREPS from  
33 each of the four regions. This discussion allowed validation of the final CeCiMO configurations  
34 (middle-range theories) defined by the analysis. **Error! Reference source not found.**  
35  
36  
37  
38  
39  
40 **Reference source not found.**illustrates the timeline of the TC-REG project.  
41  
42  
43  
44  
45  
46  
47  
48  
49  
50  
51  
52  
53  
54  
55  
56  
57  
58  
59  
60

## Results

### *Raw results*

Qualitative evidence allowed identification of links among components of the middle-range theories. The following three mechanisms were most strongly involved in the use of scientific knowledge among professionals:

- Perception of strategic utility (i.e., to legitimize practice):

*“That’s it, we really need scientific data, proven data to support what they are saying to be taken seriously.”*

*Albert, Ireps*

- Perception of instrumental utility (i.e., to change or improve practice):

*“It gives us reliable elements to be able to adapt, to build our actions, well... I see it in that sense”*

*Véronique, Organization*

- Ability to master these data (i.e., ability to use data easily and independently):

*“The data transmitted by TC-REG (the SIPREVs) will be able to evolve as a support for work and validation of scientific data in the ground and to apply them concretely”*

*Fannie, ARS*



1  
2  
3 For each of these three mechanisms, the most important activities were: i) Communication  
4 regarding scientific data, ii) Adaptation to realities encountered in the field by the professionals,  
5 iii) Support activities for the use of these data.  
6  
7

8  
9 Contexts that had the greatest influence on activities were : i) political and organizational  
10 contexts, as well as ii) previous experience regarding use of scientific evidence in practice.  
11  
12  
13  
14  
15

### 16 *Final middle-range theories*

17  
18

19 From these raw results eight final refined middle-range theories were defined (see Figure 2:  
20 Final MRTs). Organized around the mechanisms to be activated, these middle-range theories  
21 illustrate how to activate these mechanisms and under what conditions they will be activated.  
22  
23  
24  
25

- 26 1. Use of scientific knowledge (O) is facilitated if professionals **feel able to understand**  
27 **it (M)**. This perception is facilitated by activities that help to change practices (e.g.,  
28 training, support, and seminars) (Ci), particularly if the organizational context facilitates  
29 these practices (Ce) (e.g. creating trained team dedicated to these activities) and, if there  
30 is a political will to encourage it (Ce), and if the professionals gain experience from it  
31 (Ce).  
32  
33
- 34 2. Use of scientific knowledge (O) is facilitated if professionals **feel able to autonomously**  
35 **become acquainted with or master (M)** it in their practice. This perception is  
36 facilitated by activities allowing changes in practices (e.g., training, support, and  
37 seminars) that promote the use of scientific data (Ci), particularly when the organization  
38 facilitates this use (Ce), when there is an institutional policy promoting the transfer of  
39 knowledge (Ce), and when professionals gain experience from it (Ce). This perception  
40 is also increased by communication/dissemination activities based on scientific data  
41 (Ci), when they are adapted to the reality and needs of professionals (Ci). These  
42 activities are more effective if professionals are familiar with the dissemination channels  
43 (Ce).  
44  
45  
46  
47  
48  
49  
50  
51  
52  
53  
54  
55  
56  
57  
58  
59  
60

- 1  
2  
3 3. Use of scientific knowledge (O) is facilitated if professionals **feel able to locate and**  
4 **identify** such knowledge (M). This perception is facilitated by communication activities  
5 regarding these data (Ci), especially if the professionals know where to find these  
6 activities (Ce). It is also facilitated by support activities that can lead to changes in  
7 behavior (e.g., training, support, and seminars) (Ci), especially if the organization  
8 facilitates their use (Ce), if the institution encourages it (Ce), and if the professionals  
9 have some experience in the specific topic (Ce).
- 10  
11  
12 4. Use of scientific knowledge (O) is facilitated if professionals **are motivated to use it**  
13 **(M)**. This motivation can be induced by communication activities (Ci) and support for  
14 changing practices (Ci), especially if the professionals know the dissemination channels  
15 (Ce) and have already attempted to integrate these data into their practice (Ce).
- 16  
17  
18 5. Use of scientific knowledge (O) is facilitated if professionals perceive them as **useful**  
19 **to improve their practice (M)**. This perception is activated by communication  
20 activities (Ci), adaptation of evidence-based data to their reality and needs (Ci), and  
21 activities supporting changes in practices (e.g., training, support, and seminars) (Ci),  
22 particularly if the organization facilitates the use of these data (Ce), the institution  
23 encourages it, and if the professionals have acquired experience in this practice.
- 24  
25  
26 6. Use of scientific knowledge (O) is facilitated if professionals **perceive it useful to**  
27 **create new frameworks for analyzing their practices (M)**. This perception is  
28 activated by communication activities regarding these data (Ci) and by an institutional  
29 structure that promotes their use on a daily basis (e.g., dedicated service, transfer plan,  
30 and integration into team operations) (Ci). This consideration is more effective if  
31 professionals have experience in the use of scientific knowledge (Ce), especially if they  
32 have been trained (Ce), and if the organization and institutional political policy are  
33 favorable toward KT (Ce).
- 34  
35  
36 7. Use of scientific data (O) is facilitated if professionals perceive them as **useful to**  
37 **legitimize or advocate their professional activity (M)**. This perception is facilitated  
38 by communication activities regarding these data (Ci), particularly when there is a  
39 political will in favor of KT (Ce) and when professionals are aware of the dissemination  
40 channels (Ce). This perception is also promoted by activities supporting changes in  
41  
42  
43  
44  
45  
46  
47  
48  
49  
50  
51  
52  
53  
54

practices (e.g., training, support, and seminars) (Ci) that are supported by political will and professionals' experience (Ce); these are added favorable organizational conditions (Ce).

8. Use of scientific data (O) is facilitated if professionals perceive them as **useful in creating new partnerships (M)**, particularly within the research community. This perception is made possible by activities that support changes in practices (e.g., training, support, and seminars) (Ci), as well as by structured activities that promote this use on a daily basis (e.g., dedicated service, transfer plan, and integration into team operations) (Ci). This perception is more effective when professionals can financially justify the use of scientific data (Ce), when the institutional political will is favorable toward KT (Ce), when organizations facilitate this transfer (Ce), and when the professionals have experience in the use of scientific knowledge (Ce).

Taking up in this way each activity present in these refined middle-range theories it is possible to draw up practical recommendations for the field professionals for the development of KT. We have thus elaborated seven operational and contextualized recommendations to develop KT to inform regional policy-making regarding health promotion and disease prevention.

#### Recommendation 1 - Favorable professional environment for KT

Use of scientific evidence is facilitated if the institution in which professionals work shows a clear political will in this area and if the environment makes it easier to understand and to use making it more practical and more rewarding.

#### Recommendation 2 - Learning experience

While the use of scientific evidence in practice requires a significant initial investment (e.g., cognitive and temporal), the study shows that more use of scientific data by professionals leads to more routine implementation. This constitutes a learning experience.

### Recommendation 3 - Short-term utility and independent appropriation

The mechanisms most strongly involved in anchoring KT use are linked to the possibility of direct use of scientific evidence in the activities of professionals. Indeed, professionals are more inclined to use scientific data when they perceive these data as useful to legitimize, advocate, or concretely modify their practices, as well as when they feel able to mobilize these data independently. This perception is accentuated if these data are accessible, in accordance with their needs (adapted), and if they have been trained in the use of these data.

### Recommendation 4 –Promoting the perception of scientific data usefulness

Communication/dissemination of scientific data promotes perception of its usefulness, ability, and motivation to use scientific data, if the environmental working conditions allow for their use. Evidence-based dissemination activities are particularly crucial in:

- Motivation to use scientific evidence, as well as ability to identify and master it.
- Perception of the instrumental utility of scientific evidence in daily practice.
- Perception that use of scientific evidence will bring a new way of presenting their activity (conceptual utility).
- Perception that use of scientific evidence will legitimize their activities, supported by confidence in its added value (strategic utility).

### Recommendation 5 – An adapted knowledge

Data transformation and adaptation activities have an impact on the capability to utilize the data and the perception that they allow for concrete changes, if the professional environment is favorable to such changes. Data transformation and adaptation activities for stakeholders, such as inclusion of evidence-based data (via typical communication tools: adaptation and

1  
2  
3 dissemination of evidence through video vignettes, explicit and oriented guides, scientific  
4 documents, creation of bibliographical selections [evidence-based actions], and  
5 multidisciplinary and multi-professional co-construction of KT tools and processes), most  
6 notably influence:  
7  
8  
9  
10  
11

- 12 • Ability to utilize scientific data in practice.
- 13 • Perception that use of scientific data will enable professionals to change their  
14 practices (instrumental utility).  
15  
16  
17  
18  
19

#### 20 Recommendation 6 – Structural activities as facilitator

21  
22  
23 These activities facilitate the use of scientific data influence, the perceived usefulness of  
24 scientific data, particularly in framing practices and mobilizing new partnerships with research  
25 or other organizations. Structural activities to facilitate KT (e.g., institutional communication  
26 regarding a KT program or plan; use of the KT program to develop specific partnerships ;  
27 identification of a style guide for KT activities; development of a support service for KT  
28 development; evaluation of promising practices, modification, reinforcement, or activity  
29 orientation of an existing KT plan; establishment of internal coordination meetings [how to use  
30 evidence] or systematic reminders of the importance [interest and added value] of using  
31 scientific data in team and/or project meetings or in professional or financial documents)  
32  
33  
34  
35  
36  
37  
38  
39  
40  
41  
42  
43  
44 influence:  
45

- 46 • Perception that use of scientific data brings a new way of presenting activities  
47 (conceptual usefulness).  
48  
49
- 50 • Perception that use of scientific data will allow the development of new  
51 partnerships (process utility) with the research community.  
52  
53  
54  
55  
56  
57  
58  
59  
60

1  
2  
3 Recommendation 7 – Activities to support KT influence the understanding and perceptions of  
4 the usefulness of these data  
5  
6  
7

8 When the organizational and political environment within the institution is favorable, activities  
9 supporting KT will influence the capacity to understand and use scientific data and the  
10 perception of the usefulness of these data at multiple levels (i.e., entering into new partnerships,  
11 as well as legitimizing and/or renewing one's practices).  
12  
13  
14  
15  
16

17 Activities to support KT (e.g., specific communication meetings on evidence-based science,  
18 awareness on the use of evidence-based data [meetings or seminars], and training to analyze  
19 and use scientific knowledge; analysis and exchange workshops; methodological support;  
20 existence of a proactive advocate for the deployment of KT [encouragement, mobilization,  
21 reminders, and support regarding the development of KT]; methodological support for  
22 deployment of KT; creation and dissemination of methodological tools based on scientific data  
23 [grids and repositories] to support autonomous use; development of a methodological guide to  
24 assist in the implementation of KT, and to facilitate the use of tools developed based on  
25 evidence [whether from SIPREV]) influence:  
26  
27  
28  
29  
30  
31  
32  
33  
34  
35  
36  
37  
38

- 39  
40  
41  
42  
43  
44  
45  
46  
47  
48  
49  
50  
51  
52  
53  
54
- Capacity of professionals to understand, become acquainted with, and identify evidence from science.
  - Their motivation to use evidence from science.
  - Their perception that use of scientific evidence will enable changes in practices (instrumental utility), legitimize activities, and convince others of its added value (strategic utility).
  - Their perception that use of scientific evidence will enable development of partnerships with the research community if this interaction activity is supported and rewarded financially.

1  
2  
3  
4  
5 These recommendations and facilitators are made possible and catalyzed by professionals'  
6 experiences of evidence-informed practices and by the official (i.e., political, organizational, or  
7  
8 institutional) position, which should be explicitly favorable toward and encourage use of such  
9  
10 practices.  
11  
12  
13  
14  
15  
16  
17

## 18 **Discussion**

21  
22 The aim of this study was to experiment and characterize the factors associated with the success  
23 of a KT plan in health promotion and disease prevention settings in the local context in France.  
24 Success was defined as the plan's ability to i) enable public health stakeholders to address the  
25 challenges of KT and ii) bring about changes in public health policy and practices (i.e.,  
26 integration of evidence-informed public health and collaborative practices). We sought to  
27 explain the parameters and conditions of these strategies to determine their transferability into  
28 other contexts by expansion of the results obtained in the first seminar into eight more precise  
29 final theories.  
30  
31  
32  
33  
34  
35  
36  
37  
38  
39

40  
41 Notably, by specifying the middle-range theories in the French context, the results were  
42 consistent with numerous studies regarding KT [19,24,38]. Indeed, they confirmed the need to  
43 (i) combine KT strategies [24,38–40], (ii) make actions sustainable [41], (iii) transform  
44 institutions beyond simply raising the awareness of professionals [42], (iv) adapt the evidence  
45 to ensure it could be transferred to each type of audience [39,43–45], and (v) support change  
46 [6]. More specifically, our study underlines the particular weight of three major types of  
47  
48  
49  
50  
51  
52  
53  
54

1  
2  
3 activities: i) those which help to change practices and promote scientific data use (e.g., training,  
4 support, and seminars), ii) those which adapt scientific data (adapted emails, policy-briefs,  
5 advocacy, etc.), iii) and those providing support for changing practices by an institutional daily  
6 promotion of institutional structure (e.g. existence of a proactive referent for KT roll-out,  
7 development of a methodological guide to help KT implementation, development of  
8 methodological guides to assist in the use of tools developed using evidence, introducing  
9 specific exchange on evidence in current meetings, etc.). Moreover, they confirm four of most  
10 influencing contextual parameters to support KT : i) the political will in institution [46], ii) the  
11 professionals' experience in evidence use [47] ; iii) the organizational facilitators promoting  
12 evidence use (linked to person (adopter), specific practices or supports) help) [42,48], and iv)  
13 an immediate benefit in the use of evidence [2].  
14  
15  
16  
17  
18  
19  
20  
21  
22  
23  
24  
25  
26  
27  
28

29 In addition, this study highlighted the key mechanisms to be activated to enable changes in  
30 practice in the KT strategies. They can be grouped into three dimensions: i) capacities: finding,  
31 understanding, and appropriating evidence; ii) attitudes: motivation and feeling that evidence  
32 is useful; and iii) the perception of a direct interest in the use of evidence: changing practices,  
33 legitimizing the activity, advocacy, and formation of new partnerships. With reference to the  
34 interventional system concept [35], which emphasizes that mechanisms are the key functions  
35 of interventions, the results of these interventions must be transferable into other contexts. Our  
36 results confirm that the success of knowledge transfer results from “combinations of  
37 knowledge, relationship, and organizational characteristics contribute to knowledge transfer  
38 success” which are “dependent on the type of ecosystem partnership involved”[47].  
39  
40  
41  
42  
43  
44  
45  
46  
47  
48  
49  
50  
51  
52

### 53 ***Strengths and limitations:***

54  
55  
56  
57  
58  
59  
60



1  
2  
3 Our study highlighted some crucial information from the analyses. The large amount of  
4 qualitative data allowed us to create a taxonomy [37] and to develop eight refined middle-range  
5 theories and seven recommendations that will be valuable for knowledge and decision-making  
6 challenges.  
7  
8  
9

10  
11  
12 Due to the specificity of our study we made several adjustments to the initial protocol. Two  
13 rounds of interviews were initially planned. During the first seminar on May 2017, we were  
14 only able to develop a very generalist initial middle-range theory. Indeed, neither the  
15 exploratory survey nor the experience of the professionals mobilized in the seminar allowed us  
16 to define a more detailed level of KT activity, mechanisms, or contextual elements of influence,  
17 which could be used to develop several theories. Furthermore, we did not find any taxonomy  
18 in the literature sufficiently operative to structure regional action plans. Because of these  
19 observations, we reviewed our investigation strategy in three rounds of interviews, rather than  
20 two. We developed a taxonomy of KT activities that allowed comparison of identical activities  
21 among regions [37]. These developments strongly mobilized the research team, thus mobilizing  
22 the project's resources. Thus, the last seminar could not be carried out.  
23  
24  
25  
26  
27  
28  
29  
30  
31  
32  
33  
34  
35  
36  
37  
38

39 The limit of this work remains its potential for generalization. The work has been carried out in  
40 a particular field and country, the prevention field in France. It would be interesting to check  
41 whether these middle range theories are verified in other fields and other countries where the  
42 KT development might be more advanced. These investigations could lead us to refine our  
43 middle range theories or open to other configurations. Indeed, we can hypothesize that other  
44 difficulties would have to be overcome and therefore other mechanisms to be activated.  
45  
46  
47  
48  
49  
50  
51  
52  
53  
54  
55  
56  
57  
58  
59  
60

1  
2  
3 Moreover, the follow-up was carried out over 18 months. No doubt that some activities will  
4 eventually prove to be not very effective and others will surprise by their effectiveness because  
5 they have a longer latency. In fact, both professional practices and their impact take a long time  
6 to modify. Moreover this impact could be difficult to observe due to the complexity of what is  
7 at stake. There is therefore a real interest in verifying the stability of these middle range theories  
8 over time.  
9

10  
11  
12 Finally, we have not analyzed the potential synergy between Ci and Ce either, even if the  
13 observations show some leads. For example, we can observe that some external contextual  
14 elements (Ce) such as "pre-trained professionals" echo activities (Ci) "training of professionals  
15 in CT".  
16

17  
18 Notwithstanding these limits, the work carried out nevertheless offers concrete paths for the  
19 development of KT by having allowed the groups of activities to specify the conditions for their  
20 success and opens the way for further development in terms of research.  
21  
22

### 23 ***Conclusion and perspectives***

24  
25 This study used a realist methodology to reveal the factors associated with the success of a KT  
26 plan, and elucidated the mechanisms by which such strategy can bring change in public health  
27 policy and practices. We sought to explain the parameters and conditions of these strategies to  
28 determine their potential transferability into other contexts through three types of mechanisms  
29 to be activated : i) the capacities (finding, understanding, and appropriating evidence) of field  
30 professionals; ii) the attitudes, (motivation and feeling that evidence is useful); and iii) the  
31 perception of a direct interest in the use of evidence (changing practices, legitimizing the  
32  
33  
34  
35  
36  
37  
38  
39  
40  
41  
42  
43  
44  
45  
46  
47  
48  
49  
50  
51  
52  
53  
54

1  
2  
3 activity, advocacy, and formation of new partnerships). We suggest they are the key functions  
4  
5 of KT in prevention, which can be activated if a combination of activities and organizational  
6  
7 characteristics are gathered.  
8  
9

## 10 11 **Compliance with Ethical Standards** 12 13 14

15 All procedures performed in studies involving human participants were in accordance with the  
16 ethical standards of the institutional and/or national research committee, it follows the relevant  
17 French legislation of the research category on interventional research protocol involving the  
18 human person. An informed consent was obtained from all individual participants included in  
19 the study.  
20  
21  
22  
23

24 This study has received approval from the national agency for data protection *Commission*  
25 *Nationale Informatique et Libertés* (NS no. 43, registered under number 2028640 v 0).  
26  
27  
28

29 The English in this document has been checked by at least two professional editors, both native  
30 speakers of English  
31  
32  
33  
34  
35  
36  
37  
38  
39  
40  
41  
42  
43  
44  
45  
46  
47  
48  
49  
50  
51  
52  
53  
54  
55  
56  
57  
58  
59  
60

## References:

- 1 Alla F, Cambon L. Recherche interventionnelle en santé publique, transfert de connaissances et collaboration entre acteurs, décideurs et chercheurs. *Quest Santé Publique*. 2014;:1-4.
- 2 Langer L, Tripney J, Gough D. The science of using science: researching the use of research evidence in decision-making. London: : EPPI-Centre, Social Science Research Unit, UCL Institute of Education, University College London 2016.
- 3 Gervais M-J, Gagnon F, Bergeron P. Les conditions de mise à profit des connaissances par les acteurs de santé publique lors de la formulation des politiques publiques : L'apport de la littérature sur le transfert des connaissances. Montréal : Chaire d'Etude CJM-IU-UQAM. 2013.
- 4 Orton L, Lloyd-Williams F, Taylor-Robinson D, *et al*. The Use of Research Evidence in Public Health Decision Making Processes: Systematic Review. *PLoS One* 2011;6. doi:10.1371/journal.pone.0021704
- 5 Grimshaw JM, Eccles MP, Lavis JN, *et al*. Knowledge translation of research findings. *Implement Sci* 2012;7:50. doi:10.1186/1748-5908-7-50
- 6 Gervais MJ, Chagnon F. *Modélisation des déterminants et des retombées de l'application des connaissances issues de la recherche psychosociale*. Québec: : Fonds québécois de recherche sur la société et la culture 2010.
- 7 Jabot F. L'évaluation des politiques publiques : cadres conceptuel et étude de son utilisation par les décideurs des institutions régionales de santé en France [Internet]. Université de Lorraine; 2014 [cited 2017 Feb 14]. Available from: <http://www.theses.fr/2014LORR0201>. <http://www.theses.fr/2014LORR0201>
- 8 Dagenais C, Ridde V, Laurendeau M-C, *et al*. Knowledge translation research in population health: establishing a collaborative research agenda. *Health Res Policy Syst* 2009;7:28. doi:10.1186/1478-4505-7-28
- 9 Castiglione S, Ritchie J. Passer à l'action : nous connaissons les pratiques que nous souhaitons changer. Que faire, maintenant? Guide de mise en oeuvre pour les professionnels de la santé [Internet]. Instituts de Recherche en Santé du Canada; 2012 [cited 2017 Feb 28]. Available from: <http://www.cihr-irsc.gc.ca/f/45669.html>. <http://www.cihr-irsc.gc.ca/f/45669.html>
- 10 Fafard P, J Hoffman S. Rethinking knowledge translation for public health policy. *Evidence & Policy: A Journal of Research, Debate and Practice* Published Online First: 1 January 2018. doi:10.1332/174426418X15212871808802

- 11 Bornbaum CC, Kornas K, Peirson L, *et al.* Exploring the function and effectiveness of knowledge brokers as facilitators of knowledge translation in health-related settings: a systematic review and thematic analysis. *Implement Sci* 2015;**10**:162. doi:10.1186/s13012-015-0351-9
- 12 El-Jardali F, Lavis J, Moat K, *et al.* Capturing lessons learned from evidence-to-policy initiatives through structured reflection. *Health Research Policy and Systems* 2014;**12**:2. doi:10.1186/1478-4505-12-2
- 13 Siron S, Dagenais C, Ridde V. What research tells us about knowledge transfer strategies to improve public health in low-income countries: a scoping review. *Int J Public Health* 2015;**60**:849–63. doi:10.1007/s00038-015-0716-5
- 14 Dobbins M, Greco L, Yost J, *et al.* A description of a tailored knowledge translation intervention delivered by knowledge brokers within public health departments in Canada. *Health Research Policy and Systems* 2019;**17**:63. doi:10.1186/s12961-019-0460-z
- 15 Milat AJ, Li B. Narrative review of frameworks for translating research evidence into policy and practice. *Public Health Res Pract* 2017;**27**. doi:10.17061/phrp2711704
- 16 Green LW, Ottoson JM, García C, *et al.* Diffusion Theory and Knowledge Dissemination, Utilization, and Integration in Public Health. *Annual Review of Public Health* 2009;**30**:151–74. doi:10.1146/annurev.publhealth.031308.100049
- 17 Balas EA, Boren SA. Managing clinical knowledge for health care improvement. *Yearbook of medical informatics* 2000;**9**:65–70.
- 18 Tabak RG, Reis RS, Wilson P, *et al.* Dissemination of Health-Related Research among Scientists in Three Countries: Access to Resources and Current Practices. *BioMed Research International*. 2015;**2015**:e179156. doi:https://doi.org/10.1155/2015/179156
- 19 Brownson RC, Jacobs JA, Tabak RG, *et al.* Designing for Dissemination Among Public Health Researchers: Findings From a National Survey in the United States. *Am J Public Health* 2013;**103**:1693–9. doi:10.2105/AJPH.2012.301165
- 20 Brownson RC, Eyler AA, Harris JK, *et al.* Getting the Word Out: New Approaches for Disseminating Public Health Science. *Journal of Public Health Management and Practice* 2018;**24**:102–111. doi:10.1097/PHH.0000000000000673
- 21 Landry R, Amara N, Lamari M. Utilization of social science research knowledge in Canada. *Res Policy* 2001;**30**. doi:10.1016/S0048-7333(00)00081-0
- 22 Grol R. Successes and failures in the implementation of evidence-based guidelines for clinical practice. *Med Care* 2001;**39**. doi:10.1097/00005650-200108002-00003
- 23 Grol R, Grimshaw J. From best evidence to best practice: effective implementation of change in patients' care. *Lancet* 2003;**362**. doi:10.1016/S0140-6736(03)14546-1

- 1  
2  
3 24 LaRocca R, Yost J, Dobbins M, *et al.* The effectiveness of knowledge translation strategies  
4 used in public health: a systematic review. *BMC Public Health* 2012;**12**. doi:10.1186/1471-  
5 2458-12-751  
6  
7 25 Pawson R, Tilley N. *Realistic Evaluation*. SAGE Publications 1997.  
8  
9 26 Wong G, Westhorp G, Manzano A, *et al.* RAMESES II reporting standards for realist  
10 evaluations. *BMC Medicine* 2016;**14**:96. doi:10.1186/s12916-016-0643-1  
11  
12 27 Pawson R, Greenhalgh T, Harvey G, *et al.* Realist review--a new method of systematic  
13 review designed for complex policy interventions. *J Health Serv Res Policy* 2005;**10 Suppl**  
14 **1**:21–34. doi:10.1258/1355819054308530  
15  
16 28 Blaise P, Marchal B, Lefèvre P, *et al.* Au-delà des méthodes expérimentales: l'approche  
17 réaliste en évaluation. Published Online First: 2010. <http://dspace.itg.be/handle/10390/6932>  
18  
19 29 Salter KL, Kothari A. Using realist evaluation to open the black box of knowledge  
20 translation: a state-of-the-art review. *Implement Sci* 2014;**9**:115. doi:10.1186/s13012-014-  
21 0115-y  
22  
23 30 Pawson R. *Evidence Based Policy: A Realist Perspective*. SAGE Publications Ltd. 2006.  
24  
25 31 Using implementation science theories and frameworks in global health | BMJ Global  
26 Health. <https://gh.bmj.com/content/5/4/e002269> (accessed 21 Sep 2020).  
27  
28 32 Robert E, Ridde V. *Dealing With Complexity and Heterogeneity in a Collaborative Realist*  
29 *Multiple Case Study in Low- and Middle-Income Countries*. 1 Oliver's Yard, 55 City  
30 Road, London EC1Y 1SP United Kingdom: : SAGE Publications Ltd 2020.  
31 doi:10.4135/9781529732306  
32  
33 33 Ridde V, Robert E, Guichard A, *et al.* L'approche réaliste à l'épreuve du réel de l'évaluation  
34 des programmes. *The Canadian Journal of Program Evaluation* 2011;**26**:37.  
35  
36 34 Lacouture A, Breton E, Guichard A, *et al.* The concept of mechanism from a realist  
37 approach: a scoping review to facilitate its operationalization in public health program  
38 evaluation. *Implement Sci* 2015;**10**:153. doi:10.1186/s13012-015-0345-7  
39  
40 35 Cambon L, Terral P, Alla F. From intervention to interventional system: towards greater  
41 theorization in population health intervention research. *BMC Public Health* 2019;**19**:339.  
42 doi:10.1186/s12889-019-6663-y  
43  
44 36 Cambon L, Petit A, Ridde V, *et al.* Evaluation of a knowledge transfer scheme to improve  
45 policy making and practices in health promotion and disease prevention setting in French  
46 regions: a realist study protocol. *Implementation Science* 2017;**12**:83. doi:10.1186/s13012-  
47 017-0612-x  
48  
49  
50  
51  
52  
53  
54  
55  
56  
57  
58  
59  
60

- 1  
2  
3 37 Affret A, Prigent O, Porcherie M, *et al.* Development of a knowledge translation taxonomy  
4 in the field of health prevention: a participative study between researchers, decision-makers  
5 and field professionals. *Health Res Policy Syst* 2020;**18**. doi:10.1186/s12961-020-00602-z  
6  
7  
8 38 Services TF on CP. *The Guide to Community Preventive Services: What Works to Promote*  
9 *Health?* Oxford University Press 2005.  
10  
11 39 Armstrong R, Waters E, Crockett B, *et al.* The nature of evidence resources and knowledge  
12 translation for health promotion practitioners. *Health Promot Int* 2007;**22**:254–60.  
13 doi:10.1093/heapro/dam017  
14  
15 40 Barwick MA, Peters J, Boydell K. Getting to uptake: Do communities of practice support  
16 the implementation of evidence-based practice? *J Can Acad Child Adolesc Psychiatry*  
17 2009;**18**.  
18  
19 41 Tricco AC, Ashoor HM, Cardoso R, *et al.* Sustainability of knowledge translation  
20 interventions in healthcare decision-making: a scoping review. *Implementation Science*  
21 2016;**11**:55. doi:10.1186/s13012-016-0421-7  
22  
23 42 Tseng DS. Organisational changes are more effective than education and reminders for  
24 raising adult immunisation and cancer screening rates. *Evidence-based Healthcare*  
25 2002;**6**:186–7. doi:10.1054/ebhc.2002.0555  
26  
27 43 Hawkins RP, Kreuter M, Resnicow K, *et al.* Understanding tailoring in communicating  
28 about health. *Health Educ Res* 2008;**23**:454–66. doi:10.1093/her/cyn004  
29  
30 44 Kreuter MW, Wray RJ. Tailored and targeted health communication: strategies for  
31 enhancing information relevance. *American journal of health behavior* 2003;**27**:S227–32.  
32  
33 45 Dobbins M, Hanna SE, Ciliska D, *et al.* A randomized controlled trial evaluating the impact  
34 of knowledge translation and exchange strategies. *Implementation Science* 2009;**4**:61.  
35 doi:10.1186/1748-5908-4-61  
36  
37 46 El-Jardali F, Lavis JN, Ataya N, *et al.* Use of health systems and policy research evidence  
38 in the health policymaking in eastern Mediterranean countries: views and practices of  
39 researchers. *Implement Sci* 2012;**7**:2. doi:10.1186/1748-5908-7-2  
40  
41 47 Squires JE, Estabrooks CA, Gustavsson P, *et al.* Individual determinants of research  
42 utilization by nurses: a systematic review update. *Implement Sci* 2011;**6**:1.  
43 doi:10.1186/1748-5908-6-1  
44  
45 48 Bacon E, Williams MD, Davies GH. Recipes for success: Conditions for knowledge  
46 transfer across open innovation ecosystems. *International Journal of Information*  
47 *Management* 2019;**49**:377–87. doi:10.1016/j.ijinfomgt.2019.07.012  
48  
49  
50  
51  
52  
53  
54  
55  
56  
57  
58  
59  
60

1  
2  
3  
4  
5  
6  
7  
8  
9  
10  
11  
12  
13  
14  
15  
16  
17  
18  
19  
20  
21  
22  
23  
24  
25  
26  
27  
28  
29  
30  
31  
32  
33  
34  
35  
36  
37  
38  
39  
40  
41  
42  
43  
44  
45  
46  
47  
48  
49  
50  
51  
52  
53  
54  
55  
56  
57  
58  
59  
60

For peer review only



## Data statement

Not applicable

## Authors' contribution

LC supervised the study. JMF, OA and LC drafted this article and all authors revised the manuscript. The project design was developed by LC and OA. OP, OA collected the data. OA and LC analyzed the data under the supervision of LC. JMF contributed to part of this analysis. All authors read and approved the final manuscript.

## Acknowledgements

The authors are very grateful to all those who took part in the project, especially the professionals from the Bretagne, Martinique, PACA, Normandie ARS and IREPS, and the Federation nationale d'éducation pour la santé (FNES) for this partnership as well as Aurelie Affret who contributed to a part of the data collection.

## List of abbreviations

ANSP: National Public Health Agency

ARS: regional health agency

Ce : Contextual factor not linked to the intervention

Ci : Contextual factor linked to the intervention

CMO: Context – Mechanism – Outcomes

INCa: National Cancer Institute

IREPS : Regional Authority for Education and Health Promotion

TC-REG: Knowledge transfer in regions

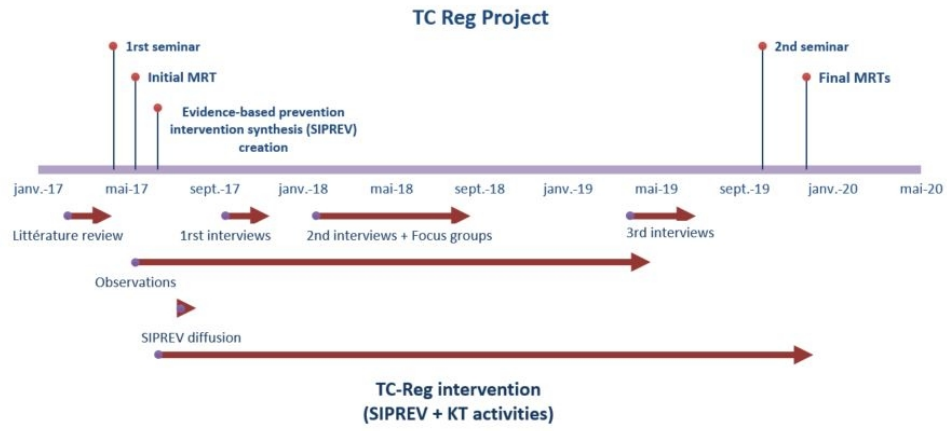

Figure 1: TC-REG Project Timeline  
163x78mm (144 x 144 DPI)

1  
2  
3  
4  
5  
6  
7  
8  
9  
10  
11  
12  
13  
14  
15  
16  
17  
18  
19  
20  
21  
22  
23  
24  
25  
26  
27  
28  
29  
30  
31  
32  
33  
34  
35  
36  
37  
38  
39  
40  
41  
42  
43  
44  
45  
46  
47  
48  
49  
50  
51  
52  
53  
54  
55  
56  
57  
58  
59  
60

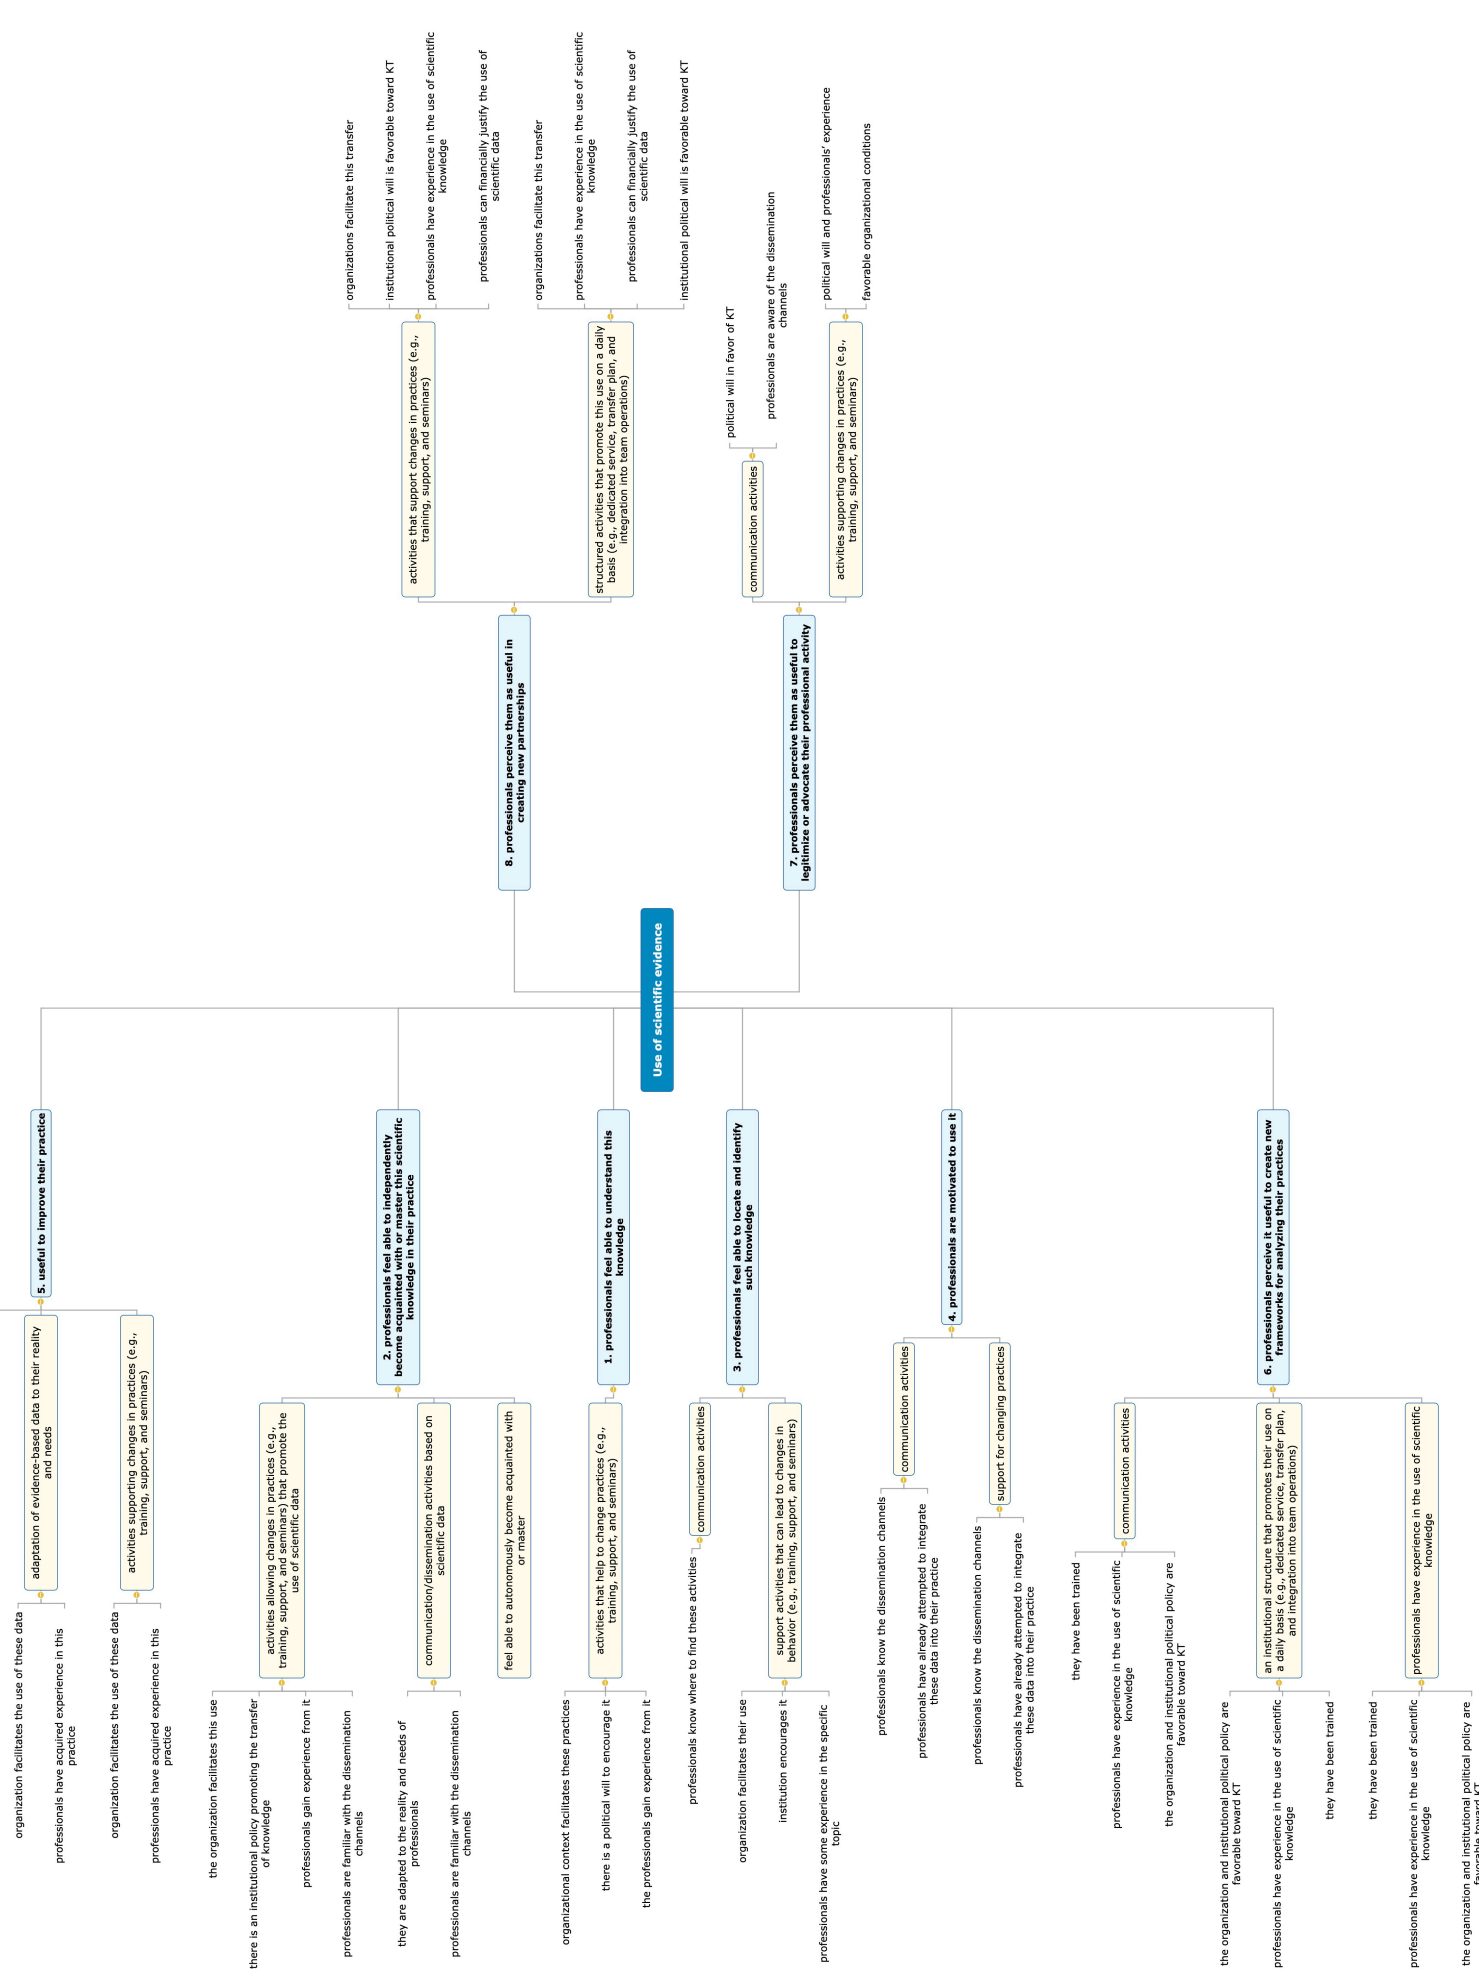

| TITLE               |                                                                                                                                                                                                                                                                                                                                                                                                                                                                                                                                                                                                                                                                                                                                                                                              | Reported in document<br>Y/N/Unclear | Page(s) in document |
|---------------------|----------------------------------------------------------------------------------------------------------------------------------------------------------------------------------------------------------------------------------------------------------------------------------------------------------------------------------------------------------------------------------------------------------------------------------------------------------------------------------------------------------------------------------------------------------------------------------------------------------------------------------------------------------------------------------------------------------------------------------------------------------------------------------------------|-------------------------------------|---------------------|
| 1                   | In the title, identify the document as a realist evaluation                                                                                                                                                                                                                                                                                                                                                                                                                                                                                                                                                                                                                                                                                                                                  | Y                                   | 1                   |
| SUMMARY OR ABSTRACT |                                                                                                                                                                                                                                                                                                                                                                                                                                                                                                                                                                                                                                                                                                                                                                                              |                                     |                     |
| 2                   | Journal articles will usually require an abstract, while reports and other forms of publication will usually benefit from a short summary. The abstract or summary should include brief details on: the policy, programme or initiative under evaluation; programme setting; purpose of the evaluation; evaluation question(s) and/or objective(s); evaluation strategy; data collection, documentation and analysis methods; key findings and conclusions Where journals require it and the nature of the study is appropriate, brief details of respondents to the evaluation and recruitment and sampling processes may also be included Sufficient detail should be provided to identify that a realist approach was used and that realist programme theory was developed and/or refined | Y                                   | 2                   |
| INTRODUCTION        |                                                                                                                                                                                                                                                                                                                                                                                                                                                                                                                                                                                                                                                                                                                                                                                              |                                     |                     |
| 3                   | Rationale for evaluation                                                                                                                                                                                                                                                                                                                                                                                                                                                                                                                                                                                                                                                                                                                                                                     | Y                                   | 4                   |
| 4                   | Programme theory                                                                                                                                                                                                                                                                                                                                                                                                                                                                                                                                                                                                                                                                                                                                                                             | Y                                   | 4&9                 |
| 5                   | Evaluation questions, objectives and focus                                                                                                                                                                                                                                                                                                                                                                                                                                                                                                                                                                                                                                                                                                                                                   | Y                                   | 5                   |
| 6                   | Ethical approval                                                                                                                                                                                                                                                                                                                                                                                                                                                                                                                                                                                                                                                                                                                                                                             | Y                                   | 2 and 28            |
| METHODS             |                                                                                                                                                                                                                                                                                                                                                                                                                                                                                                                                                                                                                                                                                                                                                                                              |                                     |                     |
| 7                   | Rationale for using realist evaluation                                                                                                                                                                                                                                                                                                                                                                                                                                                                                                                                                                                                                                                                                                                                                       | Y                                   | 8                   |
| 8                   | Environment surrounding the evaluation                                                                                                                                                                                                                                                                                                                                                                                                                                                                                                                                                                                                                                                                                                                                                       | Y                                   | 6                   |
| 9                   | Describe the programme policy, initiative or product evaluated                                                                                                                                                                                                                                                                                                                                                                                                                                                                                                                                                                                                                                                                                                                               | Y                                   | 9                   |
| 10                  | Describe and justify the evaluation design                                                                                                                                                                                                                                                                                                                                                                                                                                                                                                                                                                                                                                                                                                                                                   | Y                                   | 7 & 12              |
| 11                  | Data collection methods                                                                                                                                                                                                                                                                                                                                                                                                                                                                                                                                                                                                                                                                                                                                                                      | Y                                   | 11&12               |
| 12                  | Recruitment process and sampling strategy                                                                                                                                                                                                                                                                                                                                                                                                                                                                                                                                                                                                                                                                                                                                                    | Y                                   | 8                   |
| 13                  | Data analysis                                                                                                                                                                                                                                                                                                                                                                                                                                                                                                                                                                                                                                                                                                                                                                                | Y                                   | 19&20               |
| RESULTS             |                                                                                                                                                                                                                                                                                                                                                                                                                                                                                                                                                                                                                                                                                                                                                                                              |                                     |                     |
| 14                  | Details of participants                                                                                                                                                                                                                                                                                                                                                                                                                                                                                                                                                                                                                                                                                                                                                                      | Y                                   | 9&12-18             |
| 15                  | Main findings                                                                                                                                                                                                                                                                                                                                                                                                                                                                                                                                                                                                                                                                                                                                                                                | Y                                   | 21-24               |
| DISCUSSION          |                                                                                                                                                                                                                                                                                                                                                                                                                                                                                                                                                                                                                                                                                                                                                                                              |                                     |                     |
| 16                  | Summary of findings                                                                                                                                                                                                                                                                                                                                                                                                                                                                                                                                                                                                                                                                                                                                                                          | Y                                   | 28                  |
| 17                  | Strengths, limitations and future directions                                                                                                                                                                                                                                                                                                                                                                                                                                                                                                                                                                                                                                                                                                                                                 | Y                                   | 30                  |
| 18                  | Comparison with existing literature                                                                                                                                                                                                                                                                                                                                                                                                                                                                                                                                                                                                                                                                                                                                                          | Y                                   | 23-25               |
| 19                  | Conclusion and recommendations                                                                                                                                                                                                                                                                                                                                                                                                                                                                                                                                                                                                                                                                                                                                                               | Y                                   | 24-27&31            |
| 20                  | Funding and conflict of interest                                                                                                                                                                                                                                                                                                                                                                                                                                                                                                                                                                                                                                                                                                                                                             | Y                                   | 3                   |

## STUDY PROTOCOL

## Open Access

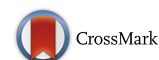

# Evaluation of a knowledge transfer scheme to improve policy making and practices in health promotion and disease prevention setting in French regions: a realist study protocol

Linda Cambon<sup>1,2,7\*</sup> , Audrey Petit<sup>1</sup>, Valery Ridde<sup>3,4</sup>, Christian Dagenais<sup>5</sup>, Marion Porcherie<sup>1</sup>, Jeanine Pommier<sup>1</sup>, Christine Ferron<sup>6</sup>, Laetitia Minary<sup>2</sup> and François Alla<sup>2</sup>

## Abstract

**Background:** Evidence-based decision-making and practice are pivotal in public health. However, barriers do persist and they relate to evidence properties, organisations and contexts. To address these major knowledge transfer (KT) issues, we need to rethink how knowledge is produced and used, to enhance our understanding of decision-making processes, logics and mechanisms and to examine the ability of public health services to integrate research findings into their decisions and operations. This article presents a realist evaluation protocol to assess a KT scheme in prevention policy and practice at local level in France.

**Methods/design:** This study is a comparative multiple case study, using a realist approach, to assess a KT scheme in regional health agencies (ARS) and regional non-profit organisations for health education and promotion (IREPS), by analysing the configurations contexts/mechanisms/outcomes of it. The KT scheme assessed is designed for the use of six reviews of systematic reviews concerning the following themes: nutrition, alcohol, tobacco smoking, physical activity, emotional and sexual life and psychosocial skills. It combines the following activities: supporting the access to and the adaptation of scientific and usable evidences; strengthening professionals' skills to analyse, adopt and use the evidences in the course of their practices and their decision-making process; facilitating the use of evidence in the organisations and processes. RAMESE II reporting standards for realist evaluations was used.

**Discussion:** The aims of this study are to experiment and characterise the factors related to the scheme's ability to enable public health stakeholders to address the challenges of KT and to integrate scientific knowledge into policy and practice. We will use the realist approach in order to document the parameters of successful KT strategies in the specific contexts of preventive health services in France, while seeking to determine the transferability of such strategies.

**Keywords:** Knowledge transfer, Realist evaluation, Complex intervention, Prevention, Public health

\* Correspondence: Linda.cambon@ehesp.fr

<sup>1</sup>UMR 6051 (CRAPE-Arenes), EHESP, Paris, France

<sup>2</sup>EA 4360, APEMAC, Université de Lorraine, Nancy, France

Full list of author information is available at the end of the article

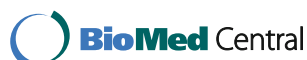

© The Author(s). 2017 **Open Access** This article is distributed under the terms of the Creative Commons Attribution 4.0 International License (<http://creativecommons.org/licenses/by/4.0/>), which permits unrestricted use, distribution, and reproduction in any medium, provided you give appropriate credit to the original author(s) and the source, provide a link to the Creative Commons license, and indicate if changes were made. The Creative Commons Public Domain Dedication waiver (<http://creativecommons.org/publicdomain/zero/1.0/>) applies to the data made available in this article, unless otherwise stated.

## Background

Evidence-based decision-making and practice are major issues in public health. For researchers, this means looking ahead to the dissemination of findings and integrating different types of knowledge and decision-making challenges [1]. It also implies greater collaboration between the research community and decision-makers [2]. Public health research issues have to be approached alongside societal and health issues too. It follows that evidence-based policy-making and planning in public health offer a way to improve the efficiency, credibility, and sustainability of health systems [1]. Furthermore, this can lead to a better social acceptance of the chosen decisions and interventions [3].

Despite the general agreement about the interest of evidence informed practices and policy-making (EIDM), barriers do persist in both the production and use of evidence. These barriers relate to people, organisations, contexts and properties of evidences [4]. To address this, it is necessary to rethink how knowledge is produced and used, to enhance our understanding of decision-making processes, logics and mechanisms and to examine the ability of public health services to integrate research findings into their decisions and operations. This requires a systemic approach, which includes the adaptation of scientific knowledge, the ability of users to capture, understand and apply the available evidence, as well as an accurate organisation and a supportive culture for using evidence. These are the major challenges of KT, defined by the National Public Health Institute of Quebec (INSPQ) as “the group of activities and interaction mechanisms that foster the dissemination, adoption and appropriation of the most up-to-date knowledge possible for use in professional practice and in healthcare management” [5].

### What stands in the way of the use of scientific evidence in public health?

In France, there is no formal and structural KT scheme. There are a few initiatives led by the National Public Health Agency (ANSP) and the National Cancer Institute (INCA), which for instance produce literature reviews. But policy-makers and prevention professionals do not use them. It confirms that a passive diffusion of knowledge is not effective, and the effectiveness of KT strategies depends on the context in which they are implemented [6–10]. The contextualization of the KT strategies is necessary to remove barriers to knowledge use. According to Gervais *et al.* [3, 11], KT research on decision-making processes offers a number of explanatory factors which may be classified in three categories. The first relates to the specific properties of the evidence itself: nature, availability, accessibility, quality and credibility (data and sources), intelligibility, ability to meet

needs, adaptability and transferability [3]. The second category relates to the personal characteristics of decision-makers: beliefs or personal values, political leanings, socio-demographics, level of education, previous experiences, motivation and ability to interpret data, etc. All of them may influence how new knowledge is addressed in the decision-making process.[12]. The third category refers to the characteristics of the organisations and local contexts in which knowledge producers and users work [4]: openness to change, material, human and financial resources available for KT, social and political context in the external environment, style of management, leadership, staffing, stakeholder coalitions, etc. Consequently, the multiple barriers to the adoption of evidence in the field of public health underline the non-linear process between knowledge production and knowledge use. If these barriers are to be overcome, we need to address all the parameters that affect the decision-making process. This is a focal point for KT research.

### The mechanisms of an effective knowledge transfer

Various strategies are available to overcome barriers to the use of KT. A recent work conducted by Langer *et al.* identified six mechanisms involved in effective KT:

- “Awareness” (M1) is defined as building awareness for, and positive attitudes toward, evidence-informed decision-making (EIDM). This mechanism emphasises the importance of decision-makers’ valuing the concept of EIDM.
- “Agree” (M2) is defined as the building mutual understanding and agreement on policy-relevant questions and the kind of evidence needed to answer them. This mechanism emphasises the importance of building mutual understanding and agreement on policy questions and what constitutes fit-for-purpose evidence.
- “Communication and access” is (M3) defined as providing communication of, and access to, evidence. This mechanism emphasises the importance of decision-makers receiving effective communication of evidence and convenient access to it.
- “Interact” (M4) is defined as the interaction between decision-makers and researchers. This mechanism emphasises the importance of decision-makers interacting with researchers in order to build trusted relationships based on mutual trust, collaborate, and gain exposure to a different type of social influence.
- “Skills” (M5) is defined as supporting decision-makers to develop skills in finding and making sense of evidence. This mechanism emphasises the importance of decision-makers’ having the necessary skills to identify, appraise, synthesise evidence, and integrate it with other information and political needs.



- 1  
2  
3  
4  
5  
6  
7  
8  
9  
10  
11  
12
- “Structure and process” (M6) is defined as influencing decision-making structures and processes. This mechanism emphasises the importance of decision-makers’ psychological, social and environmental structures and processes (e.g. personal models, professional norms, habits, organisational and institutional rules) in providing means and barriers to action.

13  
14  
15  
16  
17  
18  
19

The authors underline that these strategies are effective if combined and contextualized in their implementation setting, confirming previous work of Ridde *et al.* [13] and Barwick [14]. Consequently, we hypothesize that in France, as elsewhere, simple diffusion and “one size fits all” strategies are not effective.

20  
21  
22  
23  
24

In this paper, we present the protocol of a realist evaluation study of knowledge transfer strategies implemented in the field of health prevention at a local level in France. We have used RAMESE II reporting standards for realist evaluations [15].

### 25 26 **Study objectives and location**

27  
28  
29  
30  
31  
32  
33  
34  
35  
36  
37  
38  
39  
40

The objective of the study is to identify the configurations contexts/mechanisms/outcomes of an effective KT scheme in local prevention sector. This study will be conducted in four French regions and within two types of organisation and their partners: regional health agencies (ARS), which are responsible for policy-making and prevention policies; and non-profit organisations (IREPS). IREPS develop health promotion and prevention programs and provide methodological supports to field professionals for the implementation of prevention interventions in different settings (work places, schools, care settings, recreation and community centres, rural or urban areas, etc.). ARS and IREPS work together to implement prevention and health policies in local contexts.

### 41 42 **Methods/design**

43  
44

We have reported this manuscript in line with the RAMESES II reporting standards for realist evaluation.

### 45 46 **Study design and conceptual framework**

47  
48  
49  
50  
51  
52  
53

This study is a comparative multiple case study of a KT scheme in the field of health prevention using a realist approach [16, 17]. It concerns French public health services: ARS and IREPS. The case study design is the more suitable research strategy to investigate a phenomenon within its context and analyse this phenomenon’s interactions with several other elements relevant for our area of study [18].

54  
55  
56  
57  
58  
59

The realist approach [17] is increasingly used for appraising the interactions between an intervention, its mechanisms and its contexts. The overall aim is to achieve a better understanding of an intervention’s

success factors and how these may be replicated in other contexts. This type of evaluation examines what works, under what conditions and for whom, based on a middle-range theory (or configurational theory) which describes the interactions between outcomes, mechanisms and contexts [17, 19]. Thus, realist evaluation integrates the paradigm of black box evaluation [20]. While the experimental paradigm evaluates effectiveness without appraising an intervention’s mechanisms of impact, realist evaluation answers the following question: did the intervention work according to the theory underpinning it? This type of evaluation seeks to understand the intervention by focusing on its mechanisms and the influence of context. The mechanism is defined in this case as the “part of a participant’s response to an intervention, generally hidden and sensitive to variations in context, and which produces effects” [21]. In realist evaluation, causality is generative, meaning that what generates the effect relates specifically to the interactions between context and cause (here, the intervention methods) [19]. However, as we will study the patterns between these interactions in different contexts, we hypothesise that it is possible to isolate key elements that may apply across a set of contexts. These findings will thus generate intermediate theories that will be sharpened little by little as each case will be investigated.

To conduct a realist evaluation, we alternate theoretical and empirical stages (Cf. Fig. 1: The realist sequences). According to Langer’s work [2] and many authors [7, 10, 13, 14, 22], we hypothesize that an effective KT scheme has to combine an access to and an adaption of knowledge, the development of professionals’ skills to analyse, adopt and transfer knowledge into their contexts, the improvement of organisations and processes in order to facilitate the integration of knowledge. We also conducted an exploratory qualitative study in the four regions to collect data on the pre-existing scheme and activities related to KT and the potential local barriers. The questions were the following: what kind of KT activities are possible (types, timeline, duration, management)? Who may be involved? What structural/organisational mechanisms would be affected? What contextual factors, outside the control of those involved, would need to be addressed? Data will be collected by means of semi-structured interviews with IREPS directors and ARS public health directors (8 people). Based on the behaviour change wheel theory [23] and an exploration of the behavioural theories used in KT strategies [24], we hypothesize that the change of which will occur in knowledge use may be notably due to the motivation to use knowledge, the perception of its usefulness and practicality and the ability to adapt it in to fit different settings.



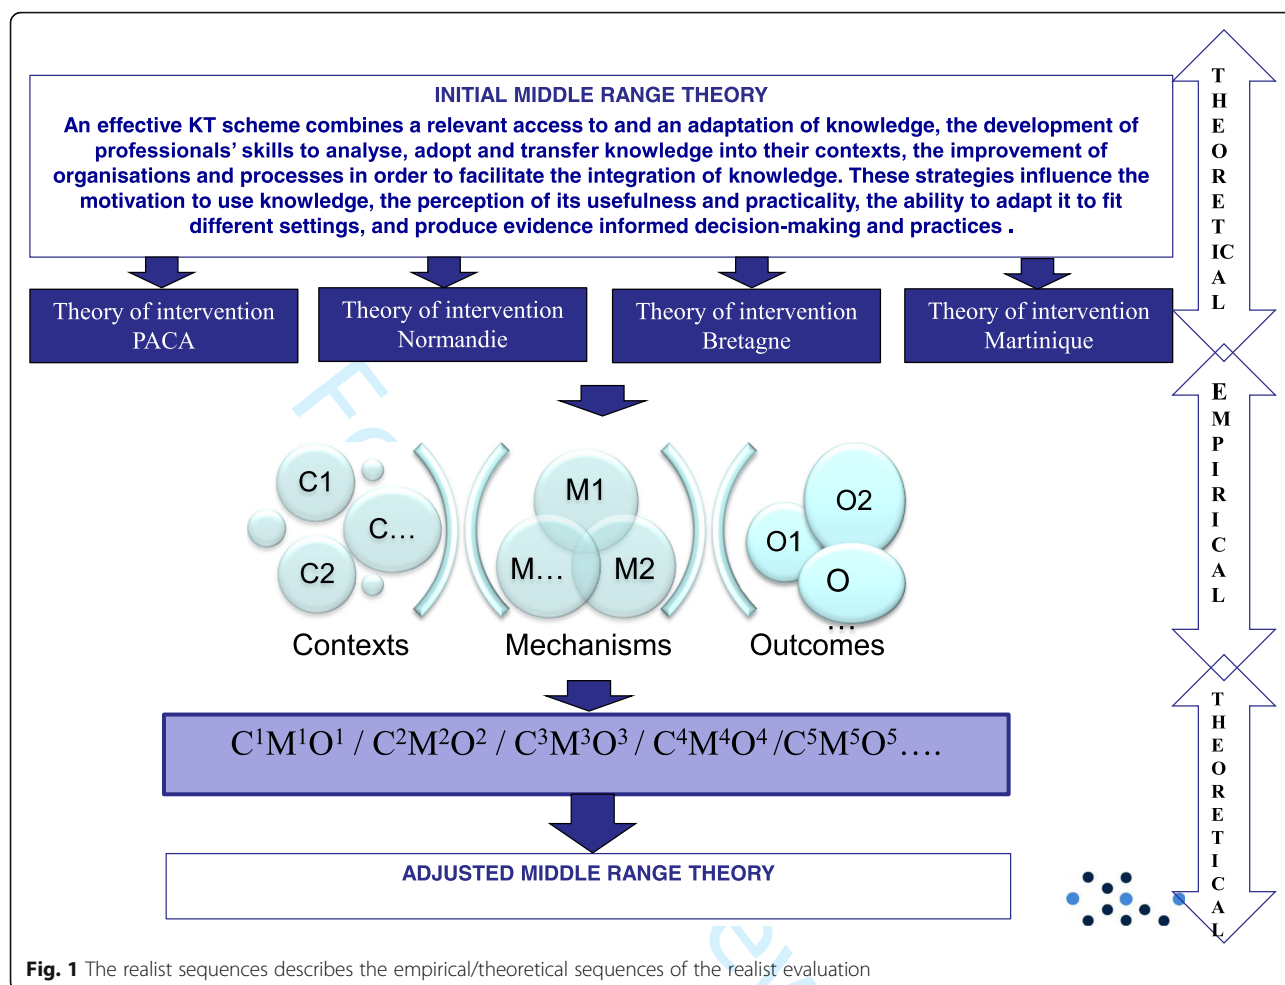

According to all the above scientific literature, and to support our realist evaluation, we built an initial middle range theory, defined as following: "An effective KT scheme combines a relevant access to and an adaptation of knowledge, the development of professionals' skills to analyse, adopt and transfer knowledge into their contexts, the improvement of organisations and processes in order to facilitate the integration of knowledge. These strategies influence the motivation to use knowledge, the perception of its usefulness and practicality, the ability to adapt it to fit different settings, and produce evidence informed decision-making and practices".

This initial middle range theory leads to the design of four theories of intervention one for each region describing the interventions, the expected outcomes, the contexts' parameters and the expected mechanisms. This work will be conducted in a preliminary 2-day workshop, gathering ARS and IREPS professionals. These theories will be applied in the 4 regions, for 12 months, and data will be collected in order to characterize the contexts, mechanisms and

outcomes and to determine the effective CMO configurations.

Finally, a cross-sectional analysis of the case studies will be conducted allowing us to identify potential regular CMO patterns, which would constitute an adjusted middle-range theory. The different stages are presented in Fig. 1 (Cf Fig. 1: The realist sequences).

#### Intervention strategies

The intervention is a KT scheme designed for the use of policy briefs (PBs), which will be written on the basis of six reviews of systematic reviews (completed by international guidelines); an international scientific committee have carried out these reviews. They concern the following themes: nutrition, alcohol, tobacco smoking, physical activity, emotional and sexual life and psychosocial skills. These themes are primary in France. They present effective prevention practices.

Based on the report entitled "The science of using science: researching the use of research evidence in decision-making" [25], the scheme combines the following activities:

- Supporting the access to and the adaptation of scientific and usable evidences especially the policy briefs.
- Strengthening professionals' skills to analyse, adopt and use the policy briefs in the course of their practices and their decision-making process (training, journal club, tutoring, etc.).
- Facilitating the use of evidence in the organisations and processes (collaborative workshops, normative processes, incentives, nudge, etc.).

According to the initial middle range theory and the 4 theories of change, professionals will make an action plan to apply them in their local settings. These KT activities will be set up over a 12-month period.

### Population

The targeted population is composed of prevention and public health services operating in French regions, namely, the ARS and IREPS and their partners. The study will focus on three groups of stakeholders:

- ARS public health professionals: five agents per region (deputy directors in charge of prevention, heads of strategy departments and project managers);
- IREPS professionals: ten people per region (directors, project managers and communication managers).
- Members of specialised prevention commissions within the Regional Conferences on Health and Autonomy (CRSA) and members of the Public Policy Coordination Commission (CCPP) both devoted to prevention in French regions (five people) and partners of IREPS and ARS.

We already have the agreement for the data collection given by the four ARS involved in the project since it began.

### Data collection

Data will be collected to document the support scheme's mechanisms and contexts parameters involved in effectiveness. They will be collected before the implementation of the KT scheme at the end and throughout the implementation. They will be collected on the 3 categories of people described before; 20 people per each region (80 at all).

Collected data will characterise the context, the mechanisms relating to the organisation and to the individuals involved, the PBs and the set-up for KT.

A description of data collected and how and they will be collected are presented in Tables 1 and 2, but these variables will be adjusted according to the four theories

of intervention and the action plans (Cf. Table 1 : Expected outcomes and Table 2 : Contexts and mechanisms expected).

Data will be collected by means of:

- Semi-structured interviews conducted with the above-mentioned population (20 people per region)
- The observation of health promotion meetings and collective events resulting from the scheme's implementation: project selection committees, selection processes, trainings, seminars, presentations etc. The aim of these observations is to study the types of interactions between the professionals who deal with KT strategies (for instance, leadership, uptake, bottom up or top down approaches).
- A documentary analysis (calls for project, action plans, projects applications, reports of meeting, etc.)

The observation and documentary analysis grids and the interview guideline will be designed based on the four intervention theories and tested on a sample of five stakeholders not involved in the process, but belonging to the IREPS network.

The collection will last 12 months.

### Data analysis

Data will be processed through a content analysis [26] defined as "A set of systematic and objective procedures for analysing communication processes in order to obtain indicators (quantitative or not) inferring knowledge related to the conditions (inferred variables) under which meaningful information is both sent and received". This analysis will code, classify and grade content in order to identify patterns, trends and specific features. We will use a software program called *Nvivo* to assist us in conducting and integrating a thematic analysis of the interviews and an analysis of the observation reports. The qualitative analysis will lead to:

- Document the uptake of evidence and the practice changes triggered by the intervention. This will be carried out on a case-per-case basis in monographic format, in order to identify the mechanisms at play, the degree of intervention, the contextual contingencies and the changes arising in the three types of knowledge use (instrumental, conceptual, persuasive).
- Identify the most regular CMO configurations by a cross-analysis of the different cases and a combination of the different data collected according to their linkage with the "context" meanings, "mechanism" meanings and "outcomes" meanings (cf Tables 1 and 2).

**Table 1** Expected outcomes

| Stakeholders | Outcomes                                                                                                                                                                   | Indicators                                                                                | Data collection                                                  |
|--------------|----------------------------------------------------------------------------------------------------------------------------------------------------------------------------|-------------------------------------------------------------------------------------------|------------------------------------------------------------------|
| ARS          | Agents use policy briefs (PBs) in discussions at committee level                                                                                                           | Number of verbatims per meetings<br>Type of PBs or extracts from PBs<br>Ways of using PBs | Semi-structured interview<br>Observation                         |
|              | Agents use evidences from PBs as criteria of project assessment                                                                                                            | Existing in assessment grids                                                              | Documentary analysis<br>Semi-structured interview                |
|              | Agents use evidences from PBs as part of conventional tools agreed between the ARS and its implementers (e.g. integration into specialised library and reference services) | Existence of mentioned PBs or extracts from PBs in documents<br>Ways of using PBs         | Documentary analysis<br>Semi-structured interview                |
|              | Agents advocate evidences from PBs in their productions (communications, reports, action plans, etc.)                                                                      | Number of communications, reports, action plans mentioning PBs or extracts from PBs       | Semi-structured interview<br>Observation<br>Documentary analysis |
|              | Professionals use evidences from PBs to design their projects                                                                                                              | Number of projects mentioning PBs or extracts from PBs<br>Ways of using PBs               | Semi-structured interview<br>Documentary analysis                |
| IREPS        | Professionals use evidences from PBs to evaluate their projects                                                                                                            | Number of evaluation based on PBs or extracts from PBs<br>Ways of using PBs               | Semi-structured interview<br>Documentary analysis                |
|              | Professionals use evidences from PBs to make reports to their sponsors                                                                                                     | Number of reporting based on PBs or extracts from PBs<br>Ways of using PBs                | Semi-structured interview<br>Documentary analysis                |
|              | Professionals use evidences from PBs in the methodological supports for field professionals                                                                                | Number of methodological supports based on PBs or extracts from PBs<br>Ways of using PBs  | Semi-structured interview<br>Observation                         |
|              | Professionals advocate evidences from PBs in their productions (communications, reports, action plans, etc.)                                                               | Number of communications, reports, action plans mentioning PBs or extracts from PBs       | Semi-structured interview<br>Observation<br>Documentary analysis |
|              | Professionals use evidences from PBs as part of conventional tools agreed with their                                                                                       | Existence of mentioned PBs or extracts from PBs in documents<br>Ways of using PBs         | Documentary analysis<br>Semi-structured interview                |

**Table 1** Expected outcomes (*Continued*)

|                     |                                                                                                          |                                                                                          |                                                                  |
|---------------------|----------------------------------------------------------------------------------------------------------|------------------------------------------------------------------------------------------|------------------------------------------------------------------|
|                     | sponsors, included ARS and partners.                                                                     |                                                                                          |                                                                  |
| Field professionals | Field professionals use evidences from PBs to design their projects                                      | Number of projects mentioning PBs or extracts from PBs<br>Ways of using PBs              | Semi-structured interview<br>Documentary analysis                |
|                     | Field professionals use evidences from PBs to design their conventional tools with partners and sponsors | Existence of mentioned PBs or extracts from PBs in documents<br>Ways of using PBs        | Documentary analysis<br>Semi-structured interview                |
| CRSA                | CRSA committee use evidences from PBs to make statements                                                 | Number of verbatim per meetings<br>Type of PBs or extracts from PBs<br>Ways of using PBs | Observation<br>Documentary analysis<br>Semi-structured interview |
| CCPP                | CCPP committee use evidences from PBs to design their partnership aim, their common projects             | Number of verbatim per meetings<br>Type of PBs or extracts from PBs<br>Ways of using PBs | Observation<br>Documentary analysis<br>Semi-structured interview |

Based on the observed elements, we will classify the outcomes in three categories of use as recorded in the literature [27, 28].

- Instrumental use: knowledge users draw on the IBs to make decisions or to change their practice;
- Conceptual use which implies changes in understanding and thinking inspired by the IBs;
- Persuasive use (also called strategic or symbolic use) which refers to a use of knowledge as a means to justify decisions or actions.

We will process these data to characterise the mechanisms identified in the intervention theory and induced by the intervention. This will enable us to answer the following questions about several mechanisms related to knowledge, people and organisations: (1) were they present in the contexts studied? (2) Did they positively or negatively influence the outcomes from a user's perspective? (3) Which mechanism(s) was (were) actually active (which parameter influenced which other parameter and/or which outcome)? (4) Which outcome(s) was (were) produced?

Then, a secondary middle range theory will then be developed, leading to future guidelines.

#### Development of an adjusted middle range theory

Based on this analysis, we will compare the CMO configurations, which will be identify with the initial middle range theory, and we will figure out an adjusted middle range theory. This work will be conducted during a

**Table 2** Contexts and mechanisms expected

| Types of variable          | CMO | Types                                                              | Variables                                         | Questions                                                                                                                                                        | Data collection                                                                                                                                                                               |                                                                                                                                                                                                                                                                                                                                                               |                                                                  |
|----------------------------|-----|--------------------------------------------------------------------|---------------------------------------------------|------------------------------------------------------------------------------------------------------------------------------------------------------------------|-----------------------------------------------------------------------------------------------------------------------------------------------------------------------------------------------|---------------------------------------------------------------------------------------------------------------------------------------------------------------------------------------------------------------------------------------------------------------------------------------------------------------------------------------------------------------|------------------------------------------------------------------|
| Context in each region (C) |     | Relating to regional policy-making and policy action on prevention | Leadership                                        | Type of management<br>Type of management structuring                                                                                                             | Observation<br>Documentary analysis<br>Semi-structured interview                                                                                                                              |                                                                                                                                                                                                                                                                                                                                                               |                                                                  |
|                            |     |                                                                    | How public health is organised                    | Funders<br>Types of funding ways (competitive call for project, conventional agreement, etc.)<br>Assessment of actions<br>Main partnership between stakeholders. | Observation<br>Documentary analysis<br>Semi-structured interview                                                                                                                              |                                                                                                                                                                                                                                                                                                                                                               |                                                                  |
|                            |     |                                                                    | Support mechanisms for stakeholders/practitioners | Types of supporting process<br>Who support the practitioners<br>Who are supported<br>Who fund the supporting activities                                          | Observation<br>Documentary analysis<br>Semi-structured interview                                                                                                                              |                                                                                                                                                                                                                                                                                                                                                               |                                                                  |
|                            |     |                                                                    | Opportunities                                     | Opportunities to work with researchers, to use evidences from researchers in practices                                                                           | Observation<br>Documentary analysis<br>Semi-structured interview                                                                                                                              |                                                                                                                                                                                                                                                                                                                                                               |                                                                  |
|                            |     |                                                                    |                                                   | Collaborative                                                                                                                                                    | Experiences of collaborating work with researchers<br>Assessment of them                                                                                                                      | Observation<br>Documentary analysis<br>Semi-structured interview                                                                                                                                                                                                                                                                                              |                                                                  |
|                            |     |                                                                    |                                                   | Specific decision-making and operational process                                                                                                                 | Description of decision-making process<br>Description of designing, setting and assessment of interventions                                                                                   | Observation<br>Documentary analysis<br>Semi-structured interview                                                                                                                                                                                                                                                                                              |                                                                  |
|                            |     | Parameters influencing the use of the PBs                          | Mechanisms (M)                                    | Relating to the PBs                                                                                                                                              | Acceptability of PBs<br>Closeness between practices and PBs recommendations<br>Convenience of PBs with context and practices<br>Credibility perceived of PBs<br>Other mechanisms not expected | Observation<br>Documentary analysis<br>Semi-structured interview                                                                                                                                                                                                                                                                                              |                                                                  |
|                            |     |                                                                    |                                                   |                                                                                                                                                                  | Relating to stakeholders/professionals                                                                                                                                                        | Ability to integrate new practices in the context, in the habits (capabilities)<br>Interest from PBS using<br>Culture of change existing (previous experiences, awareness, agreement)<br>Motivation of using PBs<br>Levels of interaction between researchers and practitioners to discuss about evidence-informed practices<br>Other mechanisms not expected | Observation<br>Documentary analysis<br>Semi-structured interview |
|                            |     |                                                                    |                                                   |                                                                                                                                                                  | Relating to organisations                                                                                                                                                                     | Changes in ability to evolve (opportunities in functioning, hierarchical agreement, etc.)<br>Temporality (opportunity to take time to introduce new knowledge coming from PBs)<br>Other blocking or driving mechanisms not expected                                                                                                                           | Observation<br>Documentary analysis<br>Semi-structured interview |
|                            |     |                                                                    |                                                   |                                                                                                                                                                  | Others                                                                                                                                                                                        | Other mechanisms not envisaged initially                                                                                                                                                                                                                                                                                                                      | Observation<br>Documentary analysis                              |

**Table 2** Contexts and mechanisms expected (Continued)

|                   |                                 |                                                                                                                                                                                                                                                                                                                                         |                                                                                               |
|-------------------|---------------------------------|-----------------------------------------------------------------------------------------------------------------------------------------------------------------------------------------------------------------------------------------------------------------------------------------------------------------------------------------|-----------------------------------------------------------------------------------------------|
| Conduct of the KT | Intervention (I) set up locally | Type of KT activity set up locally<br>Duration of these activities (action plans)<br>Types of activity carried out<br>Stage of completion of the expected activities<br>Contributors involved in KT strategies<br>Partnerships involved in KT strategies<br>Financial resources in KT strategies<br>Material resources in KT strategies | Semi-structured interview<br>Observation<br>Documentary analysis<br>Semi-structured interview |
|-------------------|---------------------------------|-----------------------------------------------------------------------------------------------------------------------------------------------------------------------------------------------------------------------------------------------------------------------------------------------------------------------------------------|-----------------------------------------------------------------------------------------------|

second interdisciplinary workshop, based on a discussion about analysis from data collected, gathering all ARS staff responsible for prevention and public health, IREPS directors and project officers, plus agents from ANSP and INCA.

KT development guidelines in France will emerge from this meeting.

#### Communication and dissemination of results

Different types of actors will be involved throughout the study: prevention professionals, policy-makers and researchers. Thus, multiple methods will be used to communicate research results:

- Developing short and practical policy briefs about knowledge transfer to national policy-makers and practitioners
- Delivering presentations at local, national meetings in France and relevant international meetings for professionals and researchers
- Regular project review meetings and continuous engagement with key decision-makers and practitioners, in particular as part of the Public Health Initiative for the Interaction between Research, Intervention and Decision-*Initiative en Santé Publique pour l'Interaction entre la Recherche, l'Intervention et la Décision* (InSPIRe-ID), a knowledge transfer consortium, led by the French Ministry of Health.
- Delivering presentations at national and international conferences and publishing articles in peer-reviewed academic journals with emphasis on open access
- Developing a project research report for the funder, with a publishable executive summary

#### Discussion

This article describes a protocol using a realist design to understand how a KT scheme works, for whom and in what circumstances. In research, realist evaluation is valuable for evaluating interventions in their contexts; it addresses contextual factors in relation to the

mechanisms and outcomes of these interventions. Thus, partial patterns can be revealed to explain how interventions may foster enhanced KT.

However, even if there is weak support in France to develop KT at a local level, KT is highly recommended by health national authorities. Consequently, we need to address a potential social desirability bias, resulting both from the subject and the fact that the data are not self-reported [28]. This bias results from the tendency of survey respondents to answer questions in a manner that will be viewed favorably by others. Moreover, we will design the interventional scheme with the different stakeholders. Researchers are thus involved in the assessed process. This contextual parameter must be taken into account in the evaluation.

The aim of this study is to experiment and characterise the success factors of a KT scheme in health promotion and disease prevention settings. By success, we mean the scheme's ability to (1) enable public health stakeholders to address the challenges of KT and (2) bring about changes in public health policy and practice: integration of evidence-informed public health, collaborative practices etc. We will seek to explain the parameters and conditions of these strategies in order to determine their transferability into other contexts. This will provide a basis for the production of operational and contextualised guidelines in order to develop KT to inform regional policy-making on health promotion and disease prevention. Ultimately, this research aims at enhancing overall policy-making and quality of implementation in the sector. With this in mind, this project will be of great interest for public policy-makers who are currently moving towards evidence-informed health promotion and disease prevention in France.

#### Abbreviations

ANSP: Agence Nationale de Santé Publique (National Agency for Public Health); ARS: Agence Régionale de Santé (Regional Health Agency); CCPP: Commission de Coordination des Politiques Publiques (Public Policy Coordination Committee); CRSA: Conférence Régionale de la Santé et de l'Autonomie (Regional Conference on Health and Autonomy); FNES: Fédération Nationale d'Éducation et de promotion de la Santé (National Federation for Health Education and Promotion); I: Intervention; IB: Intervention brief; INCa: Institut National du Cancer (National Cancer



Institute); InSPIRE-ID: Initiative en Santé Publique Pour l'Interaction entre la Recherche, l'Intervention et la Décision (a public health initiative dealing with the interaction between research, intervention and decision-making); INSPQ: Institut National de santé publique du Québec (Quebec Public Health Expertise and Reference Centre); IREPS: Instance Régionale d'Éducation et de Promotion de la Santé (a non-profit organisation promoting health at a regional level); KT: Knowledge translation; PACA: Provence-Alpes-Côte-d'Azur (region in the south of France)

#### Acknowledgements

The authors are very grateful to all those who took part in the project especially the members of the regional support teams and the Fédération Nationale d'Éducation pour la Santé.

#### Funding

This research has received funding from a national recognized research agency; the IReSP. This funding has been obtained via a national competitive peer review grant application process, named "2016 General call for projects—Prevention" (No., CAMBON-AAP16-PREV-11).

#### Availability of data and materials

Not applicable

#### Authors' contributions

LC and AP drafted this article and all authors revised the manuscript. The project design was developed by LC and AP. LM, FA, JP, MP and CF were involved in implementing the project and in developing the evaluation design. VR and CD were involved in the design of the middle range theory. All authors read and approved the final manuscript.

#### Competing interests

The authors declare that they have no competing interests.

#### Consent for publication

Not applicable

#### Ethics approval and consent to participate

The project will be carried out with full respect of current relevant legislation (e.g. the Charter of Fundamental Rights of the EU) and international conventions (e.g. Helsinki Declaration). The methods development, data collection and analysis will take account of the following issues:

- Anonymity of study respondents will be preserved and ensured at all times as respondent(s) request. Unnecessary collection of personal data will be avoided, and respondents will have the right to review outputs and withdraw consent. All personal data will be coded, removed from the data for analysis and stored separately. Only designated research staff will have access to the keys linking the data with the personal information.
- Informed consent will be obtained from all study participants, and in the case of refusal, alternative means of data collection will be explored (e.g. alternative respondents).

In addition, this study has received approval from the national agency for data protection *Commission Nationale Informatique et Libertés* (NS no. 43, registered under number 2028640 v 0).

#### Publisher's Note

Springer Nature remains neutral with regard to jurisdictional claims in published maps and institutional affiliations.

#### Author details

<sup>1</sup>UMR 6051 (CRAPE-Arenes), EHESP, Paris, France. <sup>2</sup>EA 4360, APEMAC, Université de Lorraine, Nancy, France. <sup>3</sup>Department of Social and Preventive Medicine, University of Montreal School of Public Health (ESPMU), Montreal, Canada. <sup>4</sup>University of Montreal Public Health Research Institute (IRSPUM), Montreal, Canada. <sup>5</sup>Department of Psychology, University of Montreal, Montreal, Canada. <sup>6</sup>Fédération Nationale d'Éducation et de promotion de la Santé (FNES), Paris, France. <sup>7</sup>EHESP, Paris, France.

Received: 11 May 2017 Accepted: 15 June 2017

Published online: 29 June 2017

#### References

1. Alla F, Cambon L. Recherche interventionnelle en santé publique, transfert de connaissances et collaboration entre acteurs, décideurs et chercheurs. *Quest Santé Publique*. 2014;12;1–4.
2. Langer L, Tripney J, Gough D. The science of using science: researching the use of research evidence in decision-making. London : EPPI-Centre, Social Science Research Unit, UCL Institute of Education, University College London; 2016.
3. Gervais MJ, Chagnon F. Modélisation des déterminants et des retombées de l'application des connaissances issues de la recherche psychosociale. Québec: Fonds québécois de recherche sur la société et la culture; 2010. p. 85.
4. Gervais M, Gagnon F, Bergeron P. Les conditions de mise à profit des connaissances par les acteurs de santé publique lors de la formulation des politiques publiques : L'apport de la littérature sur le transfert des connaissances. Montréal : Chaire d'Étude CJM-IU-UQAM; 2013.
5. Castiglione S, Ritchie J. Passer à l'action : nous connaissons les pratiques que nous souhaitons changer. Que faire, maintenant? Guide de mise en oeuvre pour les professionnels de la santé [Internet]. Instituts de Recherche en Santé du Canada; 2012 [cited 2017 Feb 28]. Available from: <http://www.cih-irsc.gc.ca/f/45669.html>
6. Landry R, Amara N, Lamari M. Utilization of social science research knowledge in Canada. *Res Policy*. 2001;30:333–49.
7. Dagenais C, Ridde V, Laurendeau M-C, Souffez K. Knowledge translation research in population health: establishing a collaborative research agenda. *Health Res Policy Syst*. 2009;7:28.
8. Grol R. Successes and failures in the implementation of evidence-based guidelines for clinical practice. *Med Care*. 2001;39:146–54.
9. Grol R, Grimshaw J. From best evidence to best practice: effective implementation of change in patients' care. *Lancet*. 2003;362:1225–30.
10. LaRocca R, Yost J, Dobbins M, Ciliska D, Butt M. The effectiveness of knowledge translation strategies used in public health: a systematic review. *BMC Public Health*. 2012;12:751.
11. Gervais MJ, Gagnon F, Bergeron P. Les conditions de mise à profit des connaissances par les acteurs de santé publique lors de la formulation des politiques publiques : l'apport de la littérature sur le transfert des connaissances. Montréal: Chaire d'étude CJM- IU-UQAM sur l'application des connaissances dans le domaine des jeunes et des familles en difficulté; 2013.
12. Jabot F. L'évaluation des politiques publiques : cadres conceptuel et étude de son utilisation par les décideurs des institutions régionales de santé en France [Internet]. Université de Lorraine; 2014 [cited 2017 Feb 14]. Available from: <http://www.theses.fr/2014LORR0201>
13. Ridde V, Dagenais C, Boileau-Falardeau M. Une synthèse exploratoire du courtage en connaissance en santé publique. *Santé Publique*. 2013;25(2):137–45.
14. Barwick MA, Peters J, Boydell K. Getting to uptake: Do communities of practice support the implementation of evidence-based practice? *J Can Acad Child Adolesc Psychiatry*. 2009;18:16–29.
15. Wong G, Westhorp G, Manzano A, Greenhalgh J, Jagosh J, Greenhalgh T. RAMESES II reporting standards for realist evaluations. *BMC Med*. 2016;14(1):96.
16. Pawson R. Evidence-based policy: a realist perspective. 2006.
17. Pawson R, Tilley N. Realistic Evaluation. London: Sage Publications Ltd; 1997.
18. Yin RK. Case Study Research: Design and Methods. 5th ed. Los Angeles: SAGE Publications, Inc; 2013. p. 312.
19. Blaise P, Marchal B, Lefèvre P, Kegels G. Au-delà des méthodes expérimentales : l'approche réaliste en évaluation. In: Potvin L, Moquet M-J, Jones C, editors. Réduire les inégalités sociales de santé. Saint-Denis: INPES; 2010. p. 285–96.
20. Salter KL, Kothari A. Using realist evaluation to open the black box of knowledge translation: a state-of-the-art review. *Implement Sci IS*. 2014;9:115.
21. Ridde V, Robert E, Guichard A, Blaise P, van Olmen J. L'approche réaliste à l'épreuve du réel de l'évaluation des programmes. *Can J Program Eval*. 2012;26(3):37–59.
22. Tchameni Ngamo S, Souffez K, Lord C, Dagenais C. Do knowledge translation (KT) plans help to structure KT practices? *Health Res Policy Syst*. 2016;14:46.
23. Michie S, Van Stralen MM, West R. The behaviour change wheel: A new method for characterising and designing behaviour change interventions. *Implement Sci*. 2011;6:42.

- 1  
2  
3  
4  
5  
6  
7  
8  
9  
10  
11  
12  
13  
14  
15  
16  
17  
18  
19  
20  
21  
22  
23  
24  
25  
26  
27  
28  
29  
30  
31  
32  
33  
34  
35  
36  
37  
38  
39  
40  
41  
42  
43  
44  
45  
46  
47  
48  
49  
50  
51  
52  
53  
54  
55  
56  
57  
58  
59  
60
24. Wehn U, Montalvo C. Knowledge transfer dynamics and innovation: behaviour, interactions and aggregated outcomes. *J Clean Prod.* 2016. [cited 2017 May 10]; Available from: <http://linkinghub.elsevier.com/retrieve/pii/S0959652616315396>.
  25. Langer L, Tripney J, Gough D. *The science of using science: researching the use of research evidence in decision-making.* London: EPPI-Centre, Social Science Research Unit, UCL Institute of Education: University College London; 2016.
  26. Bardin L. *L'analyse de contenu.* 2nd ed. Paris: PUF; 2013.
  27. Straus SE, Tetroe J, Graham ID, Zwarenstein M, Bhattacharyya O, Shepperd S. Monitoring use of knowledge and evaluating outcomes. *CMAJ Can Med Assoc J.* 2010;182(2):E94–8.
  28. Nass C, Moon Y, Carney P. Are respondents polite to computers? Social desirability and direct responses to computers. *J Appl Soc Psychol.* 1999; 29(5):1093–110.

For peer review only

Submit your next manuscript to BioMed Central and we will help you at every step:

- We accept pre-submission inquiries
- Our selector tool helps you to find the most relevant journal
- We provide round the clock customer support
- Convenient online submission
- Thorough peer review
- Inclusion in PubMed and all major indexing services
- Maximum visibility for your research

Submit your manuscript at  
[www.biomedcentral.com/submit](http://www.biomedcentral.com/submit)

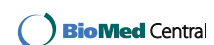

# BMJ Open

## Evaluation of a knowledge translation strategy to improve policy making and practices in health promotion and disease prevention setting in French regions: TC-REG, a realist study

|                                 |                                                                                                                                                                                                                                                                                                                                                                                                                                                                                                                                                                                                                                                                                                                                                                                                                                                                                   |
|---------------------------------|-----------------------------------------------------------------------------------------------------------------------------------------------------------------------------------------------------------------------------------------------------------------------------------------------------------------------------------------------------------------------------------------------------------------------------------------------------------------------------------------------------------------------------------------------------------------------------------------------------------------------------------------------------------------------------------------------------------------------------------------------------------------------------------------------------------------------------------------------------------------------------------|
| Journal:                        | <i>BMJ Open</i>                                                                                                                                                                                                                                                                                                                                                                                                                                                                                                                                                                                                                                                                                                                                                                                                                                                                   |
| Manuscript ID                   | bmjopen-2020-045936.R1                                                                                                                                                                                                                                                                                                                                                                                                                                                                                                                                                                                                                                                                                                                                                                                                                                                            |
| Article Type:                   | Original research                                                                                                                                                                                                                                                                                                                                                                                                                                                                                                                                                                                                                                                                                                                                                                                                                                                                 |
| Date Submitted by the Author:   | 20-Jul-2021                                                                                                                                                                                                                                                                                                                                                                                                                                                                                                                                                                                                                                                                                                                                                                                                                                                                       |
| Complete List of Authors:       | Martin-Fernandez, Judith; INSERM Bordeaux Population Health Research Center, UMR 1219, CIC1401-EC,, University of Bordeaux, ISPED,; CHU de Bordeaux<br>Aromatario, Olivier ; ISPED, University of Bordeaux; INSERM Bordeaux Population Health Research Center, UMR 1219, CIC1401-EC,, University of Bordeaux, ISPED,<br>Prigent, Ollivier; INSERM Bordeaux Population Health Research Center, UMR 1219, CIC1401-EC,, University of Bordeaux, ISPED,; ISPED, University of Bordeaux<br>Porcherie, Marion; Ecole des Hautes Etudes en Sante Publique, Sciences Humaines et Sociales UMR CNRS 6051<br>Ridde, Valéry ; CEPED, Institute for Research on Sustainable Development, IRD-Université de Paris, ERL INSERM SAGESUD<br>Cambon, Linda; ISPED, Chaire de prévention ; INSERM Bordeaux Population Health Research Center, UMR 1219, CIC1401-EC,, University of Bordeaux, ISPED, |
| <b>Primary Subject Heading</b>: | Public health                                                                                                                                                                                                                                                                                                                                                                                                                                                                                                                                                                                                                                                                                                                                                                                                                                                                     |
| Secondary Subject Heading:      | Evidence based practice                                                                                                                                                                                                                                                                                                                                                                                                                                                                                                                                                                                                                                                                                                                                                                                                                                                           |
| Keywords:                       | PUBLIC HEALTH, Organisation of health services < HEALTH SERVICES ADMINISTRATION & MANAGEMENT, Change management < HEALTH SERVICES ADMINISTRATION & MANAGEMENT, PREVENTIVE MEDICINE                                                                                                                                                                                                                                                                                                                                                                                                                                                                                                                                                                                                                                                                                                |
|                                 |                                                                                                                                                                                                                                                                                                                                                                                                                                                                                                                                                                                                                                                                                                                                                                                                                                                                                   |

SCHOLARONE™  
Manuscripts





I, the Submitting Author has the right to grant and does grant on behalf of all authors of the Work (as defined in the below author licence), an exclusive licence and/or a non-exclusive licence for contributions from authors who are: i) UK Crown employees; ii) where BMJ has agreed a CC-BY licence shall apply, and/or iii) in accordance with the terms applicable for US Federal Government officers or employees acting as part of their official duties; on a worldwide, perpetual, irrevocable, royalty-free basis to BMJ Publishing Group Ltd ("BMJ") its licensees and where the relevant Journal is co-owned by BMJ to the co-owners of the Journal, to publish the Work in this journal and any other BMJ products and to exploit all rights, as set out in our [licence](#).

The Submitting Author accepts and understands that any supply made under these terms is made by BMJ to the Submitting Author unless you are acting as an employee on behalf of your employer or a postgraduate student of an affiliated institution which is paying any applicable article publishing charge ("APC") for Open Access articles. Where the Submitting Author wishes to make the Work available on an Open Access basis (and intends to pay the relevant APC), the terms of reuse of such Open Access shall be governed by a Creative Commons licence – details of these licences and which [Creative Commons](#) licence will apply to this Work are set out in our licence referred to above.

Other than as permitted in any relevant BMJ Author's Self Archiving Policies, I confirm this Work has not been accepted for publication elsewhere, is not being considered for publication elsewhere and does not duplicate material already published. I confirm all authors consent to publication of this Work and authorise the granting of this licence.

1  
2  
3  
4  
5  
6  
7  
8  
9  
10  
11  
12  
13  
14  
15  
16  
17  
18  
19  
20  
21  
22  
23  
24  
25  
26  
27  
28  
29  
30  
31  
32  
33  
34  
35  
36  
37  
38  
39  
40  
41  
42  
43  
44  
45  
46  
47  
48  
49  
50  
51  
52  
53  
54  
55  
56  
57  
58  
59  
60

# Evaluation of a knowledge translation strategy to improve policy making and practices in health promotion and disease prevention setting in French regions: TC-REG, a realist study

<sup>1,2,3</sup> Judith Martin-Fernandez, <sup>1,2</sup> Olivier Aromatario, <sup>1,2</sup> Ollivier Prigent, <sup>4</sup>Marion Porcherie, <sup>5</sup>Valery Ridde, <sup>1,2,6</sup> Linda Cambon.

<sup>1</sup> INSERM Bordeaux Population Health Research Center, UMR 1219, CIC1401-EC, University of Bordeaux, ISPED, 33000, Bordeaux, France.

<sup>2</sup> University of Bordeaux, ISPED, F-33000 Bordeaux, France

<sup>3</sup> CHU, Bordeaux, France

<sup>4</sup>Arènes-Rennes 1 UMR CNRS 6051, EHESP, Rennes, France

<sup>5</sup>CEPED, Institute for Research on Sustainable Development, IRD-Université de Paris, ERL INSERM SAGESUD, Paris, France.

<sup>6</sup>Chaire de prévention ISPED/SPF, Université de Bordeaux, Bordeaux, France

“Corresponding author:

Judith Martin-Fernandez: [judith.martin-fernandez@u-bordeaux.fr](mailto:judith.martin-fernandez@u-bordeaux.fr)

## Abstract:

**Objective:** This paper presents the results of a realist evaluation of a knowledge translation (KT) intervention implemented in the field of health promotion and disease prevention at the local level in France.

**Design:** Realist evaluation study.

**Setting:** The target population comprised decision makers and field professionals working in prevention and public health services operating in regions of France (i.e., ARS, IREPS, and their partners).

**Participants:** This evaluation was based on data collected from 2 seminars, 82 interviews, 18 observations, and 4 focus groups over 18 months.

**Intervention:** the TC-REG intervention combined various activities: Supporting access to and adaptation of usable evidence, Strengthening professionals' skills in analyzing, adopting, and using the policy briefs, Facilitating the use of evidence in organizations and processes. The TC-REG intervention aimed to increase the use of evidence in cancer prevention, health promotion and disease prevention in four regions of France.

**Results:** The collected data was used to define favorable/unfavorable contexts for the use of scientific data and mechanisms to be activated to encourage the use of scientific knowledge. From these raw results eight final refined middle-range theories were defined. Organized around the mechanisms to be activated, these middle-range theories illustrate how to activate knowledge and under what conditions. These analyses provided a basis for the production of seven operational and contextualized recommendations to develop KT to inform regional policy-making regarding health promotion and disease prevention.

**Conclusion:** The results obtained from the analyses led us to formulate two perspectives of an operational nature for the benefit of those involved in prevention and health promotion.

**Ethics and dissemination:** This study has received approval from the national agency for data protection *Commission Nationale Informatique et Libertés* (NS no. 43, registered under number 2028640 v 0).

## Strengths and limitations of this study'

- The large amount of qualitative data allowed us to create a knowledge translation taxonomy and to develop eight middle-range theories illustrating how to activate mechanisms and under what conditions.
- This study provided a basis for the production of seven operational and contextualized recommendations to develop knowledge translation (KT) to inform regional policy-making regarding health promotion and disease prevention.
- The results obtained from the analyses described here led us to formulate two perspectives of an operational nature for the benefit of those involved in prevention and health promotion
- A limitation of this work remains its potential for generalization, as this work has been carried out in a particular field and country, the prevention field in France.

KEYWORDS: Knowledge transfer; Realist evaluation; France; Prevention; Public health, Cancer

## Funding statement

This research has received funding from the IRESP *via* a national competitive peer review grant application process “2016 General Call for projects- Prevention field” (No. CAMBON-17II015-00).

## Competing interests

The authors declare that they have no competing interests.

**Words count:** 6560

## Introduction

Evidence-based decision-making and practice are major issues in public health. For researchers, this means looking ahead to the dissemination of findings and integrating different types of knowledge and decision-making challenges [1]. It also implies a need for greater collaboration between the research community and decision-makers [2]. Even if decision-makers, stakeholders, and researchers mostly agree that it is necessary to move forward with evidence-informed practices and policy-making, some barriers persist related to people, organizations, contexts, and evidence's attributes [3–5]. Gervais et al. [3,6] suggested that KT research concerning decision-making processes offers multiple explanatory factors, which can be classified in three categories. The first category relates to the specific properties of the evidence itself: nature, availability, accessibility, quality and credibility, intelligibility, ability to meet needs, adaptability, and transferability [6]. The second category relates to the characteristics of decision-makers: beliefs or personal values, political leanings, sociodemographic characteristics, level of education, previous experiences, motivation, and ability to interpret data. These characteristics may influence how new knowledge is addressed during the decision-making process [7]. The third category relates to the characteristics of the organizations and local contexts in which knowledge producers and users perform their work [3]: openness to change; material, human, and financial resources available for KT; social and political context in the external environment; style of management; leadership; staffing; and stakeholder coalitions. Multiple barriers to the adoption of evidence in the field of public health underline the nonlinear process between knowledge production and knowledge use. These barriers prevent optimal production and use of evidence. To address this, it is necessary to assess how knowledge is produced and used; to enhance the understanding of decision-making processes and mechanisms; and to examine the abilities of public health services to integrate research findings into their decisions and operations. This assessment requires a systematic approach

1  
2  
3 that includes the adaptation of scientific knowledge; the abilities of users to capture, understand,  
4 and apply available evidence; and the presence of an organizational and supportive culture for  
5 use of this evidence. These are the major challenges of knowledge translation (KT)[8], defined  
6 as “the group of activities and interaction mechanisms that foster the dissemination, adoption  
7 and appropriation of the most up-to-date knowledge possible for use in professional practice  
8 and in healthcare management” [9].  
9

10 Over the past several decades, a growing body of literature has been published regarding KT  
11 [8,10,11]. Facilitators and barriers related to KT have been studied in several contexts [12–14];  
12 several KT frameworks that provide a mapping of KT processes have been described [15].  
13 Although these frameworks are helpful for understanding the key elements involved in KT,  
14 they lack consistency regarding implementation of KT schemes in local contexts because they  
15 provide broad concepts without concrete examples of KT activities to implement. The literature  
16 highlights the insufficient dissemination of scientific knowledge [16–20]; it also emphasizes  
17 that, to be effective, KT modalities must be contextualized to the environment in which  
18 knowledge dissemination is required. Thus, the effectiveness of KT strategies depends on the  
19 context in which they are implemented [8,21–24]. The contextualization of KT strategies is  
20 therefore necessary to remove barriers to knowledge use.  
21  
22  
23  
24  
25  
26  
27  
28  
29  
30  
31  
32  
33  
34  
35  
36  
37  
38  
39  
40  
41  
42

43 This paper presents the results of a realist evaluation study of KT strategies implemented in the  
44 field of health promotion and disease prevention at the local level in France. By disease  
45 prevention we mean specific, population-based and individual-based interventions for primary  
46 and secondary prevention, aiming to minimize the burden of diseases and associated risk factors  
47 [25].  
48  
49  
50  
51  
52  
53

54 The TC-REG (“Transfert de Connaissances en REGion”) intervention (referred to in this paper  
55 as the intervention) is a knowledge translation plan implemented differently in 4 French regions  
56 consisting of an accompanying support process for the use of evidence in cancer prevention.  
57  
58  
59  
60

1  
2  
3 The aim of the TC-REG study was to evaluate the impact of this support process to influence  
4 the decisions and preventive practices in four regions of France. This study documented the  
5 mechanisms, processes, the configurations (i.e., Contexts/Mechanisms/Outcomes [CMOs])  
6 [26] and the conditions of effectiveness established as a result of this support to ensure KT.  
7  
8  
9

10  
11  
12 RAMESES II reporting standards for realist evaluations were used [27].  
13  
14  
15

## 16 **Methods/design**

### 17 *Theoretical framework*

18  
19  
20 The realist approach [26] is increasingly used for appraising the interactions among an  
21 intervention, its mechanisms, and its contexts. The overall aim is to achieve a better  
22 understanding of an intervention's success factors and how these may be replicated in other  
23 contexts. In realist evaluation, developed by Pawson and Tilley [26], the effectiveness of the  
24 intervention depends on the underlying mechanisms that contribute within a given context.  
25 Realist evaluation involves identification of CMOs configurations. The aim comprises  
26 understanding how and why an intervention works. A middle-range theory (i.e., a theory aimed  
27 toward describing interactions among outcomes, mechanisms, and contexts and therefore  
28 CMOs configurations) is established to highlight the mutual influences of intervention and  
29 context [28,29]. This approach is linked to the black box paradigm [30] and differs from the  
30 experimental paradigm, which evaluates effectiveness without analysis of the mechanism by  
31 which an intervention is successful, as well as without the influence of context. Realist  
32 evaluation determines whether an intervention worked in a manner consistent with its  
33 underpinning theory. The generative causality works via three assumptions [31]: i) an  
34 intervention is not successful in isolate, and is not the source of a given outcome; ii) all  
35 interventions trigger a mechanism or a set of mechanisms that produce an outcome; and iii) all  
36 interventions are delivered within specific contexts.  
37  
38  
39  
40  
41  
42  
43  
44  
45  
46  
47  
48  
49  
50  
51  
52  
53  
54  
55  
56  
57  
58  
59  
60

1  
2  
3 Hence, realist evaluation involves identification of middle-range theories. Hypothesized and  
4 validated by empirical investigations, these CMOs configurations help to understand how an  
5 intervention causes change, considering both context and target group [28,29]. The recurrence  
6 of CMOs is observed in successive case studies [29]. To consider context, realist evaluators  
7 observe successive cases, which Lawson (quoted by Pawson in 2006 [31]) has described as  
8 “demi-regularities of CMOs” (i.e., regular, not necessarily permanent occurrences of an  
9 outcome when an intervention triggers one or more mechanisms in a given context) [29].  
10 Analysis of these recurrences in different contexts allows the isolation of key elements that can  
11 be replicated in a family of contexts. This yields middle-range theories that become increasingly  
12 robust with progression among cases. “These middle-range theories, in certain conditions,  
13 predict possible intervention outcomes in contexts different from the one in which the  
14 intervention was tested” [29,32].

### *Applied to our case*

15  
16  
17  
18  
19  
20  
21  
22  
23  
24  
25  
26  
27  
28  
29  
30  
31  
32  
33  
34  
35 As the realist principle is suitable for studying non-linear interactions in complex systems, we  
36 adopted this approach [33]. In our study, each region involved in the TC-REG intervention,  
37 with its own context, constituted a case. For each case, the intervention was studied to identify  
38 contributory mechanisms in a given context, along with the variation in outcomes. CMOs  
39 configurations were identified through analyses of successive cases. A cross-case analysis was  
40 performed to highlight recurrent CMOs configurations and thus identify key features for  
41 possible replication.

42  
43  
44  
45  
46  
47  
48  
49  
50  
51 Mechanisms were identified qualitatively, in accordance with the definition of Ridde et al.: “a  
52 mechanism is an element of reasoning and reaction of an agent with regard to an intervention  
53 productive of an outcome in a given context” [34,35], and in accordance with the definition of  
54  
55  
56  
57  
58  
59  
60



1  
2  
3 Cambon et al.: “What characterizes and punctuates the process of change and hence, the  
4 production of outcomes”[36].  
5  
6  
7

8 In a realist approach, interventional elements contribute to the context. Contextual elements  
9 have been included among all elements collected qualitatively that satisfy the following  
10 definition: elements located in time and space that may affect the intervention and the outcomes  
11 produced. Therefore, this study distinguished between Ci (for contextual factors linked to the  
12 intervention) and Ce (for external contextual factors that are not linked to the intervention).  
13  
14  
15  
16  
17  
18  
19

### 20 21 ***The TC-REG intervention*** 22

23  
24 The intervention is a knowledge translation plan implemented differently in four region aiming  
25 to improve the use of scientific knowledge. It was elaborated through a collaborative process  
26 aiming to collectively become acquainted with and master the concept of KT, and to identify  
27 effective strategies highlighted in the literature and their conditions of transferability. As  
28 presented in Figure 1, two kinds of literature review were carried out simultaneously: a review  
29 of the existing literature with the aim of extracting knowledge on successful KT activities and  
30 effective mechanisms in KT, and the drafting of Policy briefs (PBs) consisting of six summaries  
31 of systematic reviews presenting effective prevention practices concerning nutrition, alcohol,  
32 tobacco smoking, physical activity, emotional and sexual life, and psychosocial skills. We also  
33 conducted an exploratory qualitative study (14 non-directive interviews) in the four regions to  
34 collect data on the pre-existing scheme as well as activities related to KT and the potential local  
35 barriers. Next, a seminar allowed us to consensually define the initial middle-range theory  
36 (CMO) based on the existing literature, the results from the exploratory study, the presentation  
37 of the PBs and the project team insights. Four KT plans were designed during this seminar and  
38 implemented in each of the 4 regions over a 12-month period. Each KT plan aims to improve  
39 the use of scientific knowledge.  
40  
41  
42  
43  
44  
45  
46  
47  
48  
49  
50  
51  
52  
53  
54  
55  
56  
57  
58  
59  
60

1  
2  
3 *Figure 1: TC-REG Project Phase 1*  
4  
5  
6  
7  
8  
9

10  
11 In each of the 4 regions the following categories of activities were combined: i) Supporting  
12 access to and adaptation of scientific and usable evidence, especially policy briefs, ii)  
13 Strengthening professionals' skills in analyzing, adopting, and using the policy briefs in the  
14 course of their practices and decision-making processes (e.g., training, journal club, and  
15 tutoring); iii) Facilitating the use of evidence in organizations and processes (e.g., collaborative  
16 workshops, normative processes, and incentives). An illustration of the KT plan for one region  
17 is detailed in annex 1. The detailed activities implemented in regions and corresponding to these  
18 operational objectives have been transcribed into a standardized taxonomy published by Affret  
19 et al. [37].  
20  
21  
22  
23  
24  
25  
26  
27  
28  
29  
30  
31  
32  
33  
34  
35  
36  
37

### 38 ***Initial middle-range theory***

39 Drawing on the literature and experience of professionals locally involved in the intervention,  
40 the initial middle-range theory was established [26,31], then tested in each case (i.e., region)  
41 through collection of qualitative data [29].  
42  
43  
44  
45  
46  
47  
48  
49  
50  
51  
52  
53  
54  
55  
56  
57  
58  
59  
60

#### Box 1: The TC-REG Initial middle-range theory

### *Initial middle-range theory*

“The modalities of an effective knowledge transfer scheme combine levers that:

- promote access to information and an adaptation of it (Ci)\*,
- promote the development of capacities to understand and use them (Ci)\*,
- allow the modification of organizational processes (Ci)\* in order to facilitate their production and their appropriation in practice settings.

These modalities of KT produce an increasing use of scientific knowledge (O)\*\*\* by reinforcing:

- the perception of their usefulness (M)\*\*,
- the motivation to use them (M)\*\*,
- the ability to adapt them to the issues present in practical settings (M)\*\*”.

\*Ci=contextual factors linked to the intervention

\*\*M= Mechanism

\*\*\*O= Outcome

At this point, no external contextual factors (i.e. Ce for external contextual factors that are not linked to the intervention) were identified, because there was no consensus on this topic among participants. This process was described in the published study protocol [38].

### **Population**

This study was conducted in four regions of France<sup>1</sup> and within different types of organizations and their partners: regional health agencies (ARS<sup>2</sup>), which are responsible for policy-making and prevention policies; and non-profit organizations (IREPS<sup>3</sup>). IREPS develop health promotion and prevention programs; they also provide methodological supports to field professionals for the implementation of prevention interventions in different settings (e.g., workplaces, schools, care settings, recreation and community centers, and rural or urban areas). ARS and IREPS work collaboratively to implement prevention and health policies in local contexts.

<sup>1</sup> Paca, Brittany, Martinique, Normandy

<sup>2</sup> Agence Régionale de Santé: regional health agency

<sup>3</sup> Instance Régionale d'Education et de Promotion de la Santé pour tous: Regional organization for health promotion and education

1  
2  
3 This study focused on stakeholders who agreed to implement the intervention in the 4 regions.  
4

5 The sample of this study is composed of :  
6  
7

- 8 • ARS public health professionals: five agents per region (deputy directors in charge of  
9 prevention, heads of strategy departments, and project managers);  
10
- 11 • IREPS professionals: 10 people per region (directors, project managers, and  
12 communication managers);  
13
- 14 • Members of specialized prevention commissions within the Regional Conferences on  
15 Health and Autonomy and members of the Public Policy Coordination Commission,  
16 both dedicated to prevention in various regions of France (five people) and partners of  
17 IREPS and ARS.  
18  
19  
20  
21  
22

23  
24 These 65 persons will be named TC-REG project manager in this article.  
25

26 For all interviews, professionals were selected according to the following criteria: i)  
27 Participation in TC-REG study ; ii) Agreement to participate in the interviews; iii) Agreement  
28 with this use of the data extracted from the interviews ; iv) Diversity among institutes and  
29 professions (i.e., managerial and non-executive positions).  
30  
31  
32  
33  
34

### 35 36 ***Data collection*** 37

38  
39 This study alternated between theoretical and empirical stages. Data collection consisted of  
40 qualitative investigations through interviews and observations. The results were discussed and  
41 enriched during a seminar on 18 October 2019 with the TC-REG project manager of the four  
42 regions involved. More details regarding this study are available in the published study protocol  
43 [38].  
44  
45  
46  
47  
48  
49

50  
51 Based on the initial middle-range theory (developed during the seminar in May 2017) and to  
52 collect CMOs related to the realist analysis, three series of interviews and one series of  
53 observations were conducted.  
54  
55  
56  
57  
58  
59  
60

1  
2  
3 The first round of non-directive interviews aimed to collect and specify, with reference to the  
4 initial middle-range theory, the potential mechanisms to be activated and the external contextual  
5 elements (so-called Ce) missing in our initial middle-range theory. Thirty-six face to face  
6 interviews were conducted in October/November 2017. We asked the following question:  
7  
8 “What do you think about the use of data from science and what would you place in this  
9 category?” and “Has your thinking evolved? How? How do you explain these evolutions?”,  
10 which led to the identification of several mechanisms such as the perception of usefulness of  
11 the use of scientific knowledge, the perception of the ability to use them and the motivation to  
12 use them; and several contexts elements related to personal characteristics, organization.  
13  
14  
15  
16  
17  
18  
19  
20  
21  
22  
23

24 In the second round, the interviews were semi-directive and aimed to identify a list of KT  
25 activities (so-called Ci) actually carried out in the regions, thereby determining a taxonomy that  
26 would enable them to be compared among regions. Ten semi-directive face to face interviews  
27 with the TC-REG project managers in the regions and four focus groups were conducted  
28 between February 2018 and August 2018. This round of data collection allowed precise  
29 determination of KT activities carried out in the regions, in accordance with the KT plans  
30 defined in August 2017, as well as collection of Cis.  
31  
32  
33  
34  
35  
36  
37  
38  
39  
40

41 The third round of interviews aimed to test our initial middle-range theory and to confirm Ce-  
42 Ci-M-O configurations, but also to identify new emerging configurations. These configurations  
43 were elaborated from the previous interviews and observations. During this round of interviews,  
44 we asked participants, “Since the beginning of the TC-REG intervention, do you use data from  
45 science? How? How do you explain that?” Then we asked more precise questions aiming to  
46 evaluate the impact of the KT plans in terms of using scientific knowledge (the Outcome=’O”).  
47  
48 Initially, we planned to classify the outcomes into three categories of use (instrumental use;  
49 conceptual use; persuasive use [38]), but since it appeared that these categories were in fact  
50  
51  
52  
53  
54  
55  
56  
57  
58  
59  
60

mechanisms leading to the use of scientific knowledge, our sole outcome is the use of scientific knowledge.

This third round of interviews aimed to test our initial middle-range theory and identify CMO configurations, i.e., to answer this question: through which mechanism(s) does the increased use of evidence take place and what activities and contextual circumstances can influence it?

In total, thirty-six semi-directive telephone interviews were conducted between April and June 2019.

The observations aimed to identify local contextual elements (Ce) and mechanisms (M) activated by the use of evidence-based data (PBs or other). Eighteen observations were conducted during the TC-REG project (Table 1: Objective, data, and qualitative investigation methods).

Table 1: Objective, data, and qualitative investigation methods

| Round                                                             | Objective                                                               | Sample                                                                                                                                                                                         | Data collected                                                                                                                               |
|-------------------------------------------------------------------|-------------------------------------------------------------------------|------------------------------------------------------------------------------------------------------------------------------------------------------------------------------------------------|----------------------------------------------------------------------------------------------------------------------------------------------|
| <b>1st round of interviews</b><br>October/November 2017           | Specify: mechanisms and contextual elements                             | 36 interviews with TC-REG project managers in these regions:<br>- Brittany: 8<br>- Martinique: 12<br>- Normandy: 9<br>- PACA: 7                                                                | <b>O:</b> The current use of scientific data<br><b>M:</b> 13 Mechanisms<br><b>Ce:</b> 7 Contextual elements related to: People/ Organization |
| <b>Observations</b><br>Throughout TC-REG project                  | Identify local contextual elements and mechanisms                       | 18 Non participating observations:<br>- Brittany ( $n = 1$ )<br>- Martinique ( $n = 2$ )<br>- Normandy ( $n = 12$ )<br>- PACA ( $n = 3$ )                                                      |                                                                                                                                              |
| <b>2<sup>nd</sup> round of interviews</b><br>February/August 2018 | determine taxonomy of KT activities currently carried out among regions | 10 Semi-directive interviews with TC-REG project managers in these regions:<br>- Brittany $n = 2$<br>- Martinique $n = 2$<br>- Normandy $n = 3$<br>- PACA $n = 3$<br>4 focus groups (1/region) | <b>Ci:</b> Determine KT activities carried out among regions according to transfer plan defined in August 2017.                              |

|                                                              |                                                                                          |                                                                                                                                               |                                                                                                       |
|--------------------------------------------------------------|------------------------------------------------------------------------------------------|-----------------------------------------------------------------------------------------------------------------------------------------------|-------------------------------------------------------------------------------------------------------|
| <b>3<sup>rd</sup> round of interviews</b><br>April/June 2019 | Identify the evolution in the use of scientific data and <b>Ci-Ce-M-O</b> configurations | 36 Semi-directive interviews with TC-REG project managers in these regions:<br>- Brittany: 7<br>- Martinique: 10<br>- Normandy: 10<br>PACA: 9 | <b>O:</b> The use of scientific data and its evolution (Pbs or other)<br><br>Ci-Ce-M-O configurations |
|--------------------------------------------------------------|------------------------------------------------------------------------------------------|-----------------------------------------------------------------------------------------------------------------------------------------------|-------------------------------------------------------------------------------------------------------|

### *Data analysis*

The data collected were coded and analyzed with the NVivo® software. Because the three series of interviews and the single set of observations comprised different types of information, they helped to iteratively establish information regarding the CMO configurations at stake. Data were analyzed step by step, allowing an inductive-deductive approach. The data were analyzed by two researchers (LC and OA), then compared and reanalyzed to reach a consensus between the two.

Data were coded to identify different levels of information. A first level of coding and analysis was used to identify and separate:

- i) favorable/unfavorable contexts element to use scientific data, especially the data in PBs (Ce),
- ii) arguments evoked by the panel pro or cons the use of scientific data (foreshadowing the mechanisms to be activated, M).

Then, a second, more detailed level of coding allowed specification of the Ce and M to be activated in the use of scientific knowledge.

More precisely, the first round of interviews led to the identification of 7 external contextual elements (Ce): The existence of training prior to the use of scientific data; The financial valuation of KT; A favorable organizational context ; A favorable political context; A technical and logistical context that makes access to the data easier; Previous experiences with the use of evidence from science; Work time freed up for the use of scientific data in the professional

1  
2  
3 activity. 13 mechanisms were also identified: 3 linked to personal abilities, 2 regarding personal  
4 motivations and 8 types of perceived usefulness.  
5  
6

7  
8 The content analysis of the second wave of interviews identified a list of activities carried out  
9 in the 4 regions. This list was presented at the 2nd steering committee meeting on 13 February  
10 2019 to establish a consensus regarding the wording of the activities. In this way, 18 distinct  
11 KT actions were identified; these were grouped into 11 strategic categories, thus constituting a  
12 taxonomy. The elaboration of a standardized taxonomy helped us to use the same definition of  
13 the activities. More details have been described in Affret et al [37].  
14  
15

16  
17 Before the analysis of the 3<sup>rd</sup> round of interviews, the mechanisms and activities identified were  
18 grouped by type or theme (mechanisms were regrouped into 8 categories and KT activities in  
19 4 groups).  
20  
21

22  
23 The third round of reviews allowed the researchers to identify the Ce-Ci-MO configurations.  
24 For each mechanism (those identified following the second round of interviews or newly cited)  
25 mentioned by professionals as having evolved, the content analysis focused on the activities  
26 and contextual elements that had enabled its evolution. This round of interviews also served to  
27 identify the evolution of scientific knowledge use in these four regions (O).  
28  
29

30  
31 The analysis was based on 3 nodes of analysis: 1) which mechanisms are activated by the KT  
32 plan, 2) for each mechanism, which activity in the KT plan was influenced (based on the KT  
33 taxonomy evocated before) it, 3) by each activity, which element of the context influenced it  
34 (in the list drawn up after the 1<sup>st</sup> round of interviews or newly cited).  
35  
36

37  
38 This analysis allowed us to determine a list of different Ce-Ci-M-O, by region (the four) or by  
39 type of respondent (policymakers or field professionals). We then carried out a transversal  
40 analysis of the different Ce-Ci-M-O in order to define the configurational recurrences or demi-  
41 regularities (i.e., not perfect regularities but the repetitive Ce-Ci-M-O observed generating a  
42  
43  
44  
45  
46  
47  
48  
49  
50  
51  
52  
53  
54  
55  
56  
57  
58  
59  
60



1  
2  
3 perceptible uniformity [39]) according this rule: activities [Ci] in which the association's  
4 frequency with mechanisms [M] was higher than the average of the associations; contexts [Ce]  
5 in which the association's frequency with mechanisms [M] AND with activities [Ci] was higher  
6 than the average of the associations. This allowed us to produce a shared list of interregional  
7 (most generalizable) Ce-Ci-MOs.  
8  
9  
10  
11  
12  
13  
14

15 The results of the analysis of the series 2 and series 3 interviews were discussed during a  
16 seminar on 18 October 2019, which brought together two people per ARS and IREPS from  
17 each of the four regions. This discussion allowed validation of the final CeCiMO configurations  
18 (middle-range theories) defined by the analysis. Figure 2 illustrates the timeline of the TC-REG  
19 project.  
20  
21  
22  
23  
24  
25  
26

27 *Figure 2: TC-REG project timeline*  
28  
29  
30  
31  
32

### 33 ***Patient and Public Involvement***

34  
35 The TC-REG study does not include any patient or public involvement in terms of setting  
36 research priorities, defining research questions or outcomes, providing input into the study  
37 design, or disseminating the results. The research participants answered interviews.  
38  
39  
40  
41

## 42 **Results**

43  
44  
45 As outlined previously, the analysis followed a 3-node frame:  
46  
47  
48

### 49 ***1. Mechanisms activated by the KT plan***

50  
51  
52 Qualitative evidence allowed the identification of links between components of the middle-  
53 range theories. The following three mechanisms were most frequently reported to be strongly  
54 involved in the use of scientific knowledge among professionals:  
55  
56  
57  
58  
59

- 60 • Perception of strategic utility (i.e., to legitimize practice):

1  
2  
3  
4  
5 “That’s it, we really need scientific data, proven data to support what they are saying to be  
6 taken seriously.”  
7

8  
9 *Albert, Ireps*

- 10  
11  
12  
13  
14 • Perception of instrumental utility (i.e., to change or improve practice):  
15

16  
17 “It gives us reliable elements to be able to adapt, to build our actions, well... I see it like  
18 that”  
19

20  
21 *Véronique, Organization*

- 22  
23  
24 • Ability to master these data (i.e., ability to use data easily and independently):  
25

26  
27 “The data transmitted by TC-REG (the PBs) will be able to evolve as a support for work and  
28 validation of scientific data on the ground and to apply them concretely”  
29

30  
31 *Fannie, ARS*

32  
33 Five other mechanisms were identified but less often reported as important in the use of  
34 scientific data:  
35

- 36  
37  
38 • The ability to understand the scientific data  
39  
40 • The ability to identify and recognize the scientific knowledge  
41  
42 • The motivation to use it  
43  
44 • The perception of the conceptual utility of it (i.e., useful to create new frameworks for  
45 analyzing their practices)  
46  
47 • The perception of the processual utility of this knowledge in terms of partnerships, for  
48 example.  
49

50  
51 **2. Activities of the KT plan influencing the mechanisms**  
52

53  
54 The KT activities were grouped into 4 categories:  
55

- 56  
57 • Communication regarding scientific data,  
58  
59 • Adaptation to realities encountered in the field by the professionals,  
60

- Support activities for the use of these data
- Support activities enabling changes in professional practice

### 3. *Elements of the context influencing the activities and the mechanisms*

Contexts that had an influence on activities were:

- Political will and organizational contexts facilitating or promoting the use of scientific knowledge
- Previous experience regarding the use of scientific evidence in practice.
- Gain in experience using scientific data
- Knowing where and how to find these data (dissemination channels)
- Previous training in the use of scientific data

#### *Final middle-range theories*

From these raw results eight final refined middle-range theories were defined (see Figure 3: Final MRTs). These theories were framed, conceptualizing the recurrence of the CMO configurations or semi-regularities observed. Organized around the mechanisms to be activated, these middle-range theories illustrate how to activate these mechanisms and under what conditions they will be activated. These theories refine and enrich the initial middle-range theory.

1. Use of scientific knowledge (O) is facilitated if professionals **feel able to understand it (M)**. This perception is facilitated by activities that help to change practices (e.g., training, support, and seminars) (Ci), particularly if the organizational context facilitates these practices (Ce) (e.g. creating trained team dedicated to these activities) and, if there is a political will to encourage it (Ce), and if the professionals gain experience from it (Ce).
2. Use of scientific knowledge (O) is facilitated if professionals **feel able to autonomously become acquainted with or master (M)** it in their practice. This perception is facilitated by activities allowing changes in practices (e.g., training, support, and seminars) that promote the use of scientific data (Ci), particularly when the organization

1  
2  
3 facilitates this use (Ce), when there is an institutional policy promoting the transfer of  
4 knowledge (Ce), and when professionals gain experience from it (Ce). This perception  
5 is also increased by communication/dissemination activities based on scientific data  
6 (Ci), when they are adapted to the reality and needs of professionals (Ci). These  
7 activities are more effective if professionals are familiar with the dissemination channels  
8 (Ce).  
9

- 10  
11  
12  
13 3. Use of scientific knowledge (O) is facilitated if professionals **feel able to locate and**  
14 **identify** such knowledge (M). This perception is facilitated by communication activities  
15 regarding these data (Ci), especially if the professionals know where to find these  
16 activities (Ce). It is also facilitated by support activities that can lead to changes in  
17 behavior (e.g., training, support, and seminars) (Ci), especially if the organization  
18 facilitates their use (Ce), if the institution encourages it (Ce), and if the professionals  
19 have some experience in the specific topic (Ce).  
20  
21  
22  
23  
24
- 25 4. Use of scientific knowledge (O) is facilitated if professionals **are motivated to use it**  
26 **(M)**. This motivation can be induced by communication activities (Ci) and support for  
27 changing practices (Ci), especially if the professionals know the dissemination channels  
28 (Ce) and have already attempted to integrate these data into their practice (Ce).  
29  
30  
31  
32
- 33 5. Use of scientific knowledge (O) is facilitated if professionals perceive them as **useful**  
34 **to improve their practice (M)**. This perception is activated by communication  
35 activities (Ci), adaptation of evidence-based data to their reality and needs (Ci), and  
36 activities supporting changes in practices (e.g., training, support, and seminars) (Ci),  
37 particularly if the organization facilitates the use of these data (Ce), the institution  
38 encourages it, and if the professionals have acquired experience in this practice.  
39  
40  
41  
42
- 43 6. Use of scientific knowledge (O) is facilitated if professionals **perceive it useful to**  
44 **create new frameworks for analyzing their practices (M)**. This perception is  
45 activated by communication activities regarding these data (Ci) and by an institutional  
46 structure that promotes their use on a daily basis (e.g., dedicated service, transfer plan,  
47 and integration into team operations) (Ci). This consideration is more effective if  
48 professionals have experience in the use of scientific knowledge (Ce), especially if they  
49 have been trained (Ce), and if the organization and institutional political policy are  
50 favorable toward KT (Ce).  
51  
52
- 53 7. Use of scientific data (O) is facilitated if professionals perceive them as **useful to**  
54 **legitimize or advocate their professional activity (M)**. This perception is facilitated  
55 by communication activities regarding these data (Ci), particularly when there is a  
56  
57  
58  
59  
60

1  
2  
3 political will in favor of KT (Ce) and when professionals are aware of the dissemination  
4 channels (Ce). This perception is also promoted by activities supporting changes in  
5 practices (e.g., training, support, and seminars) (Ci) that are supported by political will  
6 and professionals' experience (Ce); these are added favorable organizational conditions  
7 (Ce).  
8  
9

- 10  
11  
12 8. Use of scientific data (O) is facilitated if professionals perceive them as **useful in**  
13 **creating new partnerships (M)**, particularly within the research community. This  
14 perception is made possible by activities that support changes in practices (e.g., training,  
15 support, and seminars) (Ci), as well as by structured activities that promote this use on  
16 a daily basis (e.g., dedicated service, transfer plan, and integration into team operations)  
17 (Ci). This perception is more effective when professionals can financially justify the use  
18 of scientific data (Ce), when the institutional political will is favorable toward KT (Ce),  
19 when organizations facilitate this transfer (Ce), and when the professionals have  
20 experience in the use of scientific knowledge (Ce).  
21  
22  
23  
24  
25  
26  
27  
28  
29

30 Taking up in this way each activity present in these refined middle-range theories it is possible  
31 to draw up practical recommendations for the field professionals for the development of KT.  
32 We have thus elaborated seven operational and contextualized recommendations to develop KT  
33 to inform regional policy-making regarding health promotion and disease prevention.  
34  
35  
36  
37  
38

#### 39 Recommendation 1 - Favorable professional environment for KT

40  
41  
42 Use of scientific evidence is facilitated if the institution in which professionals work shows a  
43 clear political will in this area and if the environment makes it easier to understand and to use  
44 making it more practical and more rewarding.  
45  
46  
47  
48

#### 49 Recommendation 2 - Learning experience

50  
51  
52 While the use of scientific evidence in practice requires a significant initial investment (e.g.,  
53 cognitive and temporal), the study shows that more use of scientific data by professionals leads  
54 to more routine implementation. This constitutes a learning experience.  
55  
56  
57  
58  
59  
60

### Recommendation 3 - Short-term utility and independent appropriation

The mechanisms most strongly involved in anchoring KT use are linked to the possibility of direct use of scientific evidence in the activities of professionals. Indeed, professionals are more inclined to use scientific data when they perceive these data as useful to legitimize, advocate, or concretely modify their practices, as well as when they feel able to mobilize these data independently. This perception is accentuated if these data are accessible, in accordance with their needs (adapted), and if they have been trained in the use of these data.

### Recommendation 4 –Promoting the perception of scientific data usefulness

Communication/dissemination of scientific data promotes perception of its usefulness, ability, and motivation to use scientific data, if the environmental working conditions allow for their use. Evidence-based dissemination activities are particularly crucial in:

- Motivation to use scientific evidence, as well as ability to identify and master it.
- Perception of the instrumental utility of scientific evidence in daily practice.
- Perception that use of scientific evidence will bring a new way of presenting their activity (conceptual utility).
- Perception that use of scientific evidence will legitimize their activities, supported by confidence in its added value (strategic utility).

### Recommendation 5 – An adapted knowledge

Data transformation and adaptation activities have an impact on the capability to utilize the data and the perception that they allow for concrete changes, if the professional environment is favorable to such changes. Data transformation and adaptation activities for stakeholders, such as inclusion of evidence-based data (via typical communication tools: adaptation and dissemination of evidence through video vignettes, explicit and oriented guides, scientific documents, creation of bibliographical selections [evidence-based actions], and

1  
2  
3 multidisciplinary and multi-professional co-construction of KT tools and processes), most  
4 notably influence:  
5  
6

- 7
- 8 • Ability to utilize scientific data in practice.
- 9
- 10 • Perception that use of scientific data will enable professionals to change their
- 11 practices (instrumental utility).
- 12
- 13
- 14
- 15

#### 16 Recommendation 6 – Structural activities as facilitator

17  
18 These activities facilitate the use of scientific data influence, the perceived usefulness of  
19 scientific data, particularly in framing practices and mobilizing new partnerships with research  
20 or other organizations. Structural activities to facilitate KT (e.g., institutional communication  
21 regarding a KT program or plan; use of the KT program to develop specific partnerships ;  
22 identification of a style guide for KT activities; development of a support service for KT  
23 development; evaluation of promising practices, modification, reinforcement, or activity  
24 orientation of an existing KT plan; establishment of internal coordination meetings [how to use  
25 evidence] or systematic reminders of the importance [interest and added value] of using  
26 scientific data in team and/or project meetings or in professional or financial documents)  
27 influence:  
28  
29  
30  
31  
32  
33  
34  
35  
36  
37  
38  
39  
40

- 41
- 42
- 43 • Perception that use of scientific data brings a new way of presenting activities
- 44 (conceptual usefulness).
- 45
- 46 • Perception that use of scientific data will allow the development of new
- 47 partnerships (process utility) with the research community.
- 48
- 49
- 50

51 Recommendation 7 – Activities to support KT influence the understanding and perceptions of  
52 the usefulness of these data  
53

54  
55  
56 When the organizational and political environment within the institution is favorable, activities  
57 supporting KT will influence the capacity to understand and use scientific data and the  
58  
59  
60

1  
2  
3 perception of the usefulness of these data at multiple levels (i.e., entering into new partnerships,  
4 as well as legitimizing and/or renewing one's practices).  
5  
6  
7

8 Activities to support KT (e.g., specific communication meetings on evidence-based science,  
9 awareness on the use of evidence-based data [meetings or seminars], and training to analyze  
10 and use scientific knowledge; analysis and exchange workshops; methodological support;  
11 existence of a proactive advocate for the deployment of KT [encouragement, mobilization,  
12 reminders, and support regarding the development of KT]; methodological support for  
13 deployment of KT; creation and dissemination of methodological tools based on scientific data  
14 [grids and repositories] to support autonomous use; development of a methodological guide to  
15 assist in the implementation of KT, and to facilitate the use of tools developed based on  
16 evidence [whether from PBs]) influence:  
17  
18  
19  
20  
21  
22  
23  
24  
25  
26  
27  
28

- 29 • Capacity of professionals to understand, become acquainted with, and identify  
30 evidence from science.  
31
- 32 • Their motivation to use evidence from science.  
33
- 34 • Their perception that use of scientific evidence will enable changes in practices  
35 (instrumental utility), legitimize activities, and convince others of its added value  
36 (strategic utility).  
37
- 38 • Their perception that use of scientific evidence will enable development of partnerships  
39 with the research community if this interaction activity is supported and rewarded  
40 financially.  
41  
42  
43  
44  
45  
46  
47

48 These recommendations and facilitators are made possible and catalyzed by professionals'  
49 experiences of evidence-informed practices and by the official (i.e., political, organizational, or  
50 institutional) position, which should be explicitly favorable toward and encourage use of such  
51 practices.  
52  
53  
54  
55  
56  
57

## 58 **Discussion**

59  
60



1  
2  
3 The aim of this study was to experiment and characterize the factors associated with the success  
4 of a KT plan in health promotion and disease prevention settings in the local context in France.  
5  
6 Success was defined as the plan's ability to i) enable public health stakeholders to address the  
7  
8 challenges of KT and ii) bring about changes in public health policy and practices (i.e.,  
9  
10 integration of evidence-informed public health and collaborative practices). We sought to  
11  
12 explain the parameters and conditions of these strategies to determine their transferability into  
13  
14 other contexts by expansion of the results obtained in the first seminar into eight more precise  
15  
16 final theories.  
17  
18  
19  
20  
21

22 Notably, by specifying the middle-range theories in the French context, the results were  
23  
24 consistent with numerous studies regarding KT [19,24,40]. Indeed, they confirmed the need to  
25  
26 (i) combine KT strategies [24,40–42], (ii) make actions sustainable [43], (iii) transform  
27  
28 institutions beyond simply raising the awareness of professionals [44], (iv) adapt the evidence  
29  
30 to ensure it could be transferred to each type of audience [41,45–47], and (v) support change  
31  
32 [6]. More specifically, our study underlines the particular weight of three major types of  
33  
34 activities: i) those which help to change practices and promote scientific data use (e.g., training,  
35  
36 support, and seminars), ii) those which adapt scientific data (adapted emails, policy-briefs,  
37  
38 advocacy, etc.), iii) and those providing support for changing practices by an institutional daily  
39  
40 promotion of institutional structure (e.g. existence of a proactive referent for KT roll-out,  
41  
42 development of a methodological guide to help KT implementation, development of  
43  
44 methodological guides to assist in the use of tools developed using evidence, introducing  
45  
46 specific exchange on evidence in current meetings, etc.). Moreover, they confirm four of most  
47  
48 influencing contextual parameters to support KT: i) the political will in institution [48], ii) the  
49  
50 professionals' experience in evidence use [49] ; iii) the organizational facilitators promoting  
51  
52 evidence use (linked to person (adopter), specific practices or supports) help) [42,48], and iv)  
53  
54 an immediate benefit in the use of evidence [2].  
55  
56  
57  
58  
59  
60

1  
2  
3 In addition, this study highlighted the key mechanisms to be activated to enable changes in  
4 practice in the KT strategies. They can be grouped into three dimensions: i) capacities: finding,  
5 understanding, and appropriating evidence; ii) attitudes: motivation and feeling that evidence  
6 is useful; and iii) the perception of a direct interest in the use of evidence: changing practices,  
7 legitimizing the activity, advocacy, and formation of new partnerships. With reference to the  
8 interventional system concept [36], which emphasizes that mechanisms are the key functions  
9 of interventions, the results of these interventions must be transferable into other contexts. Our  
10 results confirm that the success of knowledge transfer results from “combinations of  
11 knowledge, relationship, and organizational characteristics contribute to knowledge transfer  
12 success” which are “dependent on the type of ecosystem partnership involved”[47].  
13  
14  
15  
16  
17  
18  
19  
20  
21  
22  
23  
24  
25  
26

### 27 ***Strengths and limitations:***

28  
29  
30 Our study highlighted some crucial information from the analyses. The large amount of  
31 qualitative data allowed us to create a taxonomy [37] and to develop eight refined middle-range  
32 theories and seven recommendations that will be valuable for knowledge and decision-making  
33 challenges.  
34  
35  
36  
37  
38  
39

40 Due to the specificity of our study we made several adjustments to the initial protocol. Two  
41 rounds of interviews were initially planned. During the first seminar on May 2017, we were  
42 only able to develop a very generalist initial middle-range theory. Indeed, neither the  
43 exploratory survey nor the experience of the professionals mobilized in the seminar allowed us  
44 to define a more detailed level of KT activity, mechanisms, or external contextual elements of  
45 influence, which could be used to develop several theories. Furthermore, we did not find any  
46 taxonomy in the literature sufficiently operative to structure regional action plans. Because of  
47 these observations, we reviewed our investigation strategy in three rounds of interviews, rather  
48 than two. We developed a taxonomy of KT activities that allowed comparison of identical  
49  
50  
51  
52  
53  
54  
55  
56  
57  
58  
59  
60

1  
2  
3 activities among regions [37]. These developments strongly mobilized the research team, thus  
4  
5 mobilizing the project's resources. Thus, the last seminar could not be carried out.  
6  
7

8 The limit of this work remains its potential for generalization. The work has been carried out in  
9  
10 a particular field and country, the prevention field in France. It would be interesting to check  
11  
12 whether these middle range theories are verified in other fields and other countries where the  
13  
14 KT development might be more advanced. These investigations could lead us to refine our  
15  
16 middle range theories or open to other configurations. Indeed, we can hypothesize that other  
17  
18 difficulties would have to be overcome and therefore other mechanisms to be activated.  
19  
20

21  
22 Moreover, the follow-up was carried out over 18 months. No doubt that some activities will  
23  
24 eventually prove to be not very effective and others will surprise by their effectiveness because  
25  
26 they have a longer latency. In fact, both professional practices and their impact take a long time  
27  
28 to modify. Moreover this impact could be difficult to observe due to the complexity of what is  
29  
30 at stake. There is therefore a real interest in verifying the stability of these middle range theories  
31  
32 over time.  
33  
34  
35

36  
37 Finally, we have not analyzed the potential synergy between Ci and Ce either, even if the  
38  
39 observations show some leads. For example, we can observe that some external contextual  
40  
41 elements (Ce) such as "pre-trained professionals" echo activities (Ci) "training of professionals  
42  
43 in CT".  
44  
45

46  
47 Notwithstanding these limits, the work carried out nevertheless offers concrete paths for the  
48  
49 development of KT by having allowed the groups of activities to specify the conditions for their  
50  
51 success and opens the way for further development in terms of research.  
52  
53

### 54 55 ***Conclusion and perspectives*** 56 57 58 59 60

1  
2  
3 This study used a realist methodology to reveal the factors associated with the success of a KT  
4 plan, and elucidated the mechanisms by which such strategy can bring change in public health  
5 policy and practices. We sought to explain the parameters and conditions of these strategies to  
6 determine their potential transferability into other contexts through three types of mechanisms  
7 to be activated: i) the capacities (finding, understanding, and appropriating evidence) of field  
8 professionals; ii) the attitudes, (motivation and feeling that evidence is useful); and iii) the  
9 perception of a direct interest in the use of evidence (changing practices, legitimizing the  
10 activity, advocacy, and formation of new partnerships). We suggest they are the key functions  
11 of KT in prevention, which can be activated if a combination of activities and organizational  
12 characteristics are gathered.  
13  
14  
15  
16  
17  
18  
19  
20  
21  
22  
23  
24  
25  
26

## 27 **Compliance with Ethical Standards**

31 All procedures performed in studies involving human participants were in accordance with the  
32 ethical standards of the institutional and/or national research committee, it follows the relevant  
33 French legislation of the research category on interventional research protocol involving the  
34 human person. An informed consent was obtained from all individual participants included in  
35 the study.  
36  
37  
38  
39

40 This study has received approval from the national agency for data protection *Commission*  
41 *Nationale Informatique et Libertés* (NS no. 43, registered under number 2028640 v 0).  
42  
43  
44

45 The English in this document has been checked by at least two professional editors, both native  
46 speakers of English  
47  
48  
49  
50  
51  
52  
53  
54  
55  
56  
57  
58  
59  
60

## References:

- 1 Alla F, Cambon L. Recherche interventionnelle en santé publique, transfert de connaissances et collaboration entre acteurs, décideurs et chercheurs. *Quest Santé Publique*. 2014;:1–4.
- 2 Langer L, Tripney J, Gough D. The science of using science: researching the use of research evidence in decision-making. London: : EPPI-Centre, Social Science Research Unit, UCL Institute of Education, University College London 2016.
- 3 Gervais M-J, Gagnon F, Bergeron P. Les conditions de mise à profit des connaissances par les acteurs de santé publique lors de la formulation des politiques publiques : L'apport de la littérature sur le transfert des connaissances. Montréal : Chaire d'Etude CJM-IU-UQAM. 2013.
- 4 Orton L, Lloyd-Williams F, Taylor-Robinson D, *et al*. The Use of Research Evidence in Public Health Decision Making Processes: Systematic Review. *PLoS One* 2011;6. doi:10.1371/journal.pone.0021704
- 5 Grimshaw JM, Eccles MP, Lavis JN, *et al*. Knowledge translation of research findings. *Implement Sci* 2012;7:50. doi:10.1186/1748-5908-7-50
- 6 Gervais MJ, Chagnon F. *Modélisation des déterminants et des retombées de l'application des connaissances issues de la recherche psychosociale*. Québec: : Fonds québécois de recherche sur la société et la culture 2010.
- 7 Jabot F. L'évaluation des politiques publiques : cadres conceptuel et étude de son utilisation par les décideurs des institutions régionales de santé en France [Internet]. Université de Lorraine; 2014 [cited 2017 Feb 14]. Available from: <http://www.theses.fr/2014LORR0201>.  
<http://www.theses.fr/2014LORR0201>

1  
2  
3 8 Dagenais C, Ridde V, Laurendeau M-C, *et al.* Knowledge translation research in  
4 population health: establishing a collaborative research agenda. *Health Res Policy Syst*  
5 2009;**7**:28. doi:10.1186/1478-4505-7-28  
6  
7

8  
9  
10 9 Castiglione S, Ritchie J. Passer à l'action : nous connaissons les pratiques que nous  
11 souhaitons changer. Que faire, maintenant? Guide de mise en oeuvre pour les professionnels de  
12 la santé [Internet]. Instituts de Recherche en Santé du Canada; 2012 [cited 2017 Feb 28].  
13 Available from: [http://www.cihr-](http://www.cihr-irsc.gc.ca/f/45669.html)  
14 [irsc.gc.ca/f/45669.html](http://www.cihr-irsc.gc.ca/f/45669.html) [http://www.cihr-](http://www.cihr-irsc.gc.ca/f/45669.html)  
15 [irsc.gc.ca/f/45669.html](http://www.cihr-irsc.gc.ca/f/45669.html)  
16  
17  
18  
19  
20  
21

22  
23 10 Fafard P, J Hoffman S. Rethinking knowledge translation for public health policy.  
24 *Evidence & Policy: A Journal of Research, Debate and Practice* Published Online First: 1  
25 January 2018. doi:10.1332/174426418X15212871808802  
26  
27  
28

29  
30 11 Bornbaum CC, Kornas K, Peirson L, *et al.* Exploring the function and effectiveness of  
31 knowledge brokers as facilitators of knowledge translation in health-related settings: a  
32 systematic review and thematic analysis. *Implement Sci* 2015;**10**:162. doi:10.1186/s13012-015-  
33 0351-9  
34  
35  
36  
37  
38

39  
40 12 El-Jardali F, Lavis J, Moat K, *et al.* Capturing lessons learned from evidence-to-policy  
41 initiatives through structured reflection. *Health Research Policy and Systems* 2014;**12**:2.  
42 doi:10.1186/1478-4505-12-2  
43  
44  
45  
46

47  
48 13 Siron S, Dagenais C, Ridde V. What research tells us about knowledge transfer  
49 strategies to improve public health in low-income countries: a scoping review. *Int J Public*  
50 *Health* 2015;**60**:849–63. doi:10.1007/s00038-015-0716-5  
51  
52  
53  
54

55  
56 14 Dobbins M, Greco L, Yost J, *et al.* A description of a tailored knowledge translation  
57 intervention delivered by knowledge brokers within public health departments in Canada.  
58 *Health Research Policy and Systems* 2019;**17**:63. doi:10.1186/s12961-019-0460-z  
59  
60

- 1  
2  
3 15 Milat AJ, Li B. Narrative review of frameworks for translating research evidence into  
4 policy and practice. *Public Health Res Pract* 2017;**27**. doi:10.17061/phrp2711704  
5  
6  
7  
8  
9 16 Green LW, Ottoson JM, García C, *et al*. Diffusion Theory and Knowledge  
10 Dissemination, Utilization, and Integration in Public Health. *Annual Review of Public Health*  
11 2009;**30**:151–74. doi:10.1146/annurev.publhealth.031308.100049  
12  
13  
14  
15  
16 17 Balas EA, Boren SA. Managing clinical knowledge for health care improvement.  
17 *Yearbook of medical informatics* 2000;**9**:65–70.  
18  
19  
20  
21 18 Tabak RG, Reis RS, Wilson P, *et al*. Dissemination of Health-Related Research among  
22 Scientists in Three Countries: Access to Resources and Current Practices. *BioMed Research*  
23 *International*. 2015;**2015**:e179156. doi:https://doi.org/10.1155/2015/179156  
24  
25  
26  
27  
28  
29 19 Brownson RC, Jacobs JA, Tabak RG, *et al*. Designing for Dissemination Among Public  
30 Health Researchers: Findings From a National Survey in the United States. *Am J Public Health*  
31 2013;**103**:1693–9. doi:10.2105/AJPH.2012.301165  
32  
33  
34  
35  
36 20 Brownson RC, Eyler AA, Harris JK, *et al*. Getting the Word Out: New Approaches for  
37 Disseminating Public Health Science. *Journal of Public Health Management and Practice*  
38 2018;**24**:102–11. doi:10.1097/PHH.0000000000000673  
39  
40  
41  
42  
43  
44 21 Landry R, Amara N, Lamari M. Utilization of social science research knowledge in  
45 Canada. *Res Policy* 2001;**30**. doi:10.1016/S0048-7333(00)00081-0  
46  
47  
48  
49 22 Grol R. Successes and failures in the implementation of evidence-based guidelines for  
50 clinical practice. *Med Care* 2001;**39**. doi:10.1097/00005650-200108002-00003  
51  
52  
53  
54 23 Grol R, Grimshaw J. From best evidence to best practice: effective implementation of  
55 change in patients' care. *Lancet* 2003;**362**. doi:10.1016/S0140-6736(03)14546-1  
56  
57  
58  
59 24 LaRocca R, Yost J, Dobbins M, *et al*. The effectiveness of knowledge translation  
60

1  
2  
3 strategies used in public health: a systematic review. *BMC Public Health* 2012;**12**.  
4  
5 doi:10.1186/1471-2458-12-751  
6  
7

8 25 WHO EMRO | Health promotion and disease prevention through population-based  
9 interventions, including action to address social determinants and health inequity | Public health  
10 functions | À propos de l’OMS. [http://www.emro.who.int/fr/about-who/public-health-](http://www.emro.who.int/fr/about-who/public-health-functions/health-promotion-disease-prevention.html)  
11 [functions/health-promotion-disease-prevention.html](http://www.emro.who.int/fr/about-who/public-health-functions/health-promotion-disease-prevention.html) (accessed 20 May 2021).  
12  
13  
14  
15

16  
17  
18 26 Pawson R, Tilley N. *Realistic Evaluation*. SAGE Publications 1997.  
19

20  
21 27 Wong G, Westhorp G, Manzano A, *et al*. RAMESES II reporting standards for realist  
22 evaluations. *BMC Medicine* 2016;**14**:96. doi:10.1186/s12916-016-0643-1  
23  
24  
25

26  
27 28 Pawson R, Greenhalgh T, Harvey G, *et al*. Realist review--a new method of systematic  
28 review designed for complex policy interventions. *J Health Serv Res Policy* 2005;**10 Suppl**  
29 **1**:21–34. doi:10.1258/1355819054308530  
30  
31  
32

33  
34 29 Blaise P, Marchal B, Lefèvre P, *et al*. Au-delà des méthodes expérimentales: l’approche  
35 réaliste en évaluation. Published Online First: 2010.<http://dspace.itg.be/handle/10390/6932>  
36  
37  
38

39  
40 30 Salter KL, Kothari A. Using realist evaluation to open the black box of knowledge  
41 translation: a state-of-the-art review. *Implement Sci* 2014;**9**:115. doi:10.1186/s13012-014-  
42 0115-y  
43  
44  
45

46  
47 31 Pawson R. *Evidence Based Policy: A Realist Perspective*. SAGE Publications Ltd. 2006.  
48

49  
50 32 Using implementation science theories and frameworks in global health | BMJ Global  
51 Health. <https://gh.bmj.com/content/5/4/e002269> (accessed 21 Sep 2020).  
52  
53  
54

55 33 Robert E, Ridde V. *Dealing With Complexity and Heterogeneity in a Collaborative*  
56 *Realist Multiple Case Study in Low- and Middle-Income Countries*. 1 Oliver’s Yard, 55 City  
57 Road, London EC1Y 1SP United Kingdom: : SAGE Publications Ltd 2020.  
58  
59  
60



1  
2  
3 doi:10.4135/9781529732306  
4  
5

6 34 Ridde V, Robert E, Guichard A, *et al.* L'approche réaliste à l'épreuve du réel de  
7 l'évaluation des programmes. *The Canadian Journal of Program Evaluation* 2011;**26**:37.  
8  
9

10 35 Lacouture A, Breton E, Guichard A, *et al.* The concept of mechanism from a realist  
11 approach: a scoping review to facilitate its operationalization in public health program  
12 evaluation. *Implement Sci* 2015;**10**:153. doi:10.1186/s13012-015-0345-7  
13  
14  
15  
16

17 36 Cambon L, Terral P, Alla F. From intervention to interventional system: towards greater  
18 theorization in population health intervention research. *BMC Public Health* 2019;**19**:339.  
19  
20  
21  
22  
23  
24  
25  
26  
27  
28  
29  
30  
31  
32  
33  
34  
35  
36  
37  
38  
39  
40  
41  
42  
43  
44  
45  
46  
47  
48  
49  
50  
51  
52  
53  
54  
55  
56  
57  
58  
59  
60  
doi:10.1186/s12889-019-6663-y

37 Affret A, Prigent O, Porcherie M, *et al.* Development of a knowledge translation  
taxonomy in the field of health prevention: a participative study between researchers, decision-  
makers and field professionals. *Health Res Policy Syst* 2020;**18**. doi:10.1186/s12961-020-  
00602-z

38 Cambon L, Petit A, Ridde V, *et al.* Evaluation of a knowledge transfer scheme to  
improve policy making and practices in health promotion and disease prevention setting in  
French regions: a realist study protocol. *Implementation Science* 2017;**12**:83.  
doi:10.1186/s13012-017-0612-x

39 Vaessen J, Leeuw FL. *Mind the Gap: Perspectives on Policy Evaluation and the Social  
Sciences*. Transaction Publishers 2011.

40 Services TF on CP. *The Guide to Community Preventive Services: What Works to  
Promote Health?* Oxford University Press 2005.

41 Armstrong R, Waters E, Crockett B, *et al.* The nature of evidence resources and  
knowledge translation for health promotion practitioners. *Health Promot Int* 2007;**22**:254–60.

1  
2  
3 doi:10.1093/heapro/dam017  
4  
5

6 42 Barwick MA, Peters J, Boydell K. Getting to uptake: Do communities of practice  
7 support the implementation of evidence-based practice? *J Can Acad Child Adolesc Psychiatry*  
8 2009;**18**.  
9  
10  
11

12  
13 43 Tricco AC, Ashoor HM, Cardoso R, *et al*. Sustainability of knowledge translation  
14 interventions in healthcare decision-making: a scoping review. *Implementation Science*  
15 2016;**11**:55. doi:10.1186/s13012-016-0421-7  
16  
17  
18

19  
20  
21 44 Tseng DS. Organisational changes are more effective than education and reminders for  
22 raising adult immunisation and cancer screening rates. *Evidence-based Healthcare*  
23 2002;**6**:186–7. doi:10.1054/ebhc.2002.0555  
24  
25  
26

27  
28  
29 45 Hawkins RP, Kreuter M, Resnicow K, *et al*. Understanding tailoring in communicating  
30 about health. *Health Educ Res* 2008;**23**:454–66. doi:10.1093/her/cyn004  
31  
32

33  
34 46 Kreuter MW, Wray RJ. Tailored and targeted health communication: strategies for  
35 enhancing information relevance. *American journal of health behavior* 2003;**27**:S227–32.  
36  
37  
38

39 47 Dobbins M, Hanna SE, Ciliska D, *et al*. A randomized controlled trial evaluating the  
40 impact of knowledge translation and exchange strategies. *Implementation Science* 2009;**4**:61.  
41  
42  
43  
44  
45  
46

47 48 El-Jardali F, Lavis JN, Ataya N, *et al*. Use of health systems and policy research  
48 evidence in the health policymaking in eastern Mediterranean countries: views and practices of  
49 researchers. *Implement Sci* 2012;**7**:2. doi:10.1186/1748-5908-7-2  
50  
51  
52

53  
54 49 Squires JE, Estabrooks CA, Gustavsson P, *et al*. Individual determinants of research  
55 utilization by nurses: a systematic review update. *Implement Sci* 2011;**6**:1. doi:10.1186/1748-  
56  
57  
58  
59  
60

1  
2  
3 50 Bacon E, Williams MD, Davies GH. Recipes for success: Conditions for knowledge  
4 transfer across open innovation ecosystems. *International Journal of Information Management*  
5  
6  
7 2019;**49**:377–87. doi:10.1016/j.ijinfomgt.2019.07.012  
8  
9  
10  
11  
12  
13  
14  
15  
16  
17  
18  
19  
20  
21  
22  
23  
24  
25  
26  
27  
28  
29  
30  
31  
32  
33  
34  
35  
36  
37  
38  
39  
40  
41  
42  
43  
44  
45  
46  
47  
48  
49  
50  
51  
52  
53  
54  
55  
56  
57  
58  
59  
60

For peer review only

## Data statement

Not applicable

## Authors' contribution

LC supervised the study. JMF, OA and LC drafted this article and all authors revised the manuscript. The project design was developed by LC and OA. OP, OA collected the data. OA and LC analyzed the data under the supervision of LC. JMF contributed to part of this analysis. All authors read and approved the final manuscript.

## Acknowledgements

The authors are very grateful to all those who took part in the project, especially the professionals from the Bretagne, Martinique, PACA, Normandie ARS and IREPS, and the Federation nationale d'éducation pour la santé (FNES) for this partnership as well as Aurelie Affret who contributed to a part of the data collection.

## List of abbreviations

ANSP: National Public Health Agency

ARS: regional health agency

Ce: Contextual factor not linked to the intervention

Ci: Contextual factor linked to the intervention

CMO: Context – Mechanism – Outcomes

INCa: National Cancer Institute

IREPS: Regional Authority for Education and Health Promotion

TC-REG: Knowledge transfer in regions

Annex 1 Illustration of the KT plan for one region

An illustration of the contextualised knowledge translation (KT) scheme to be implemented in a region: KT activities to be implemented and expected outcomes according to several publics of professionals regionally involved in prevention and health promotion (IREPS professionals, ARS professionals, stakeholders, CRSA professionals).

| Activities to implement with IREPS professionals and expected outcomes                                                                                                       |                          |
|------------------------------------------------------------------------------------------------------------------------------------------------------------------------------|--------------------------|
| <i>Activities</i>                                                                                                                                                            | <i>Expected Outcomes</i> |
| Deliberative working group in order to develop a policy-brief for CRSA professionals and committee presidents                                                                | 1, 5                     |
| Deliberative working group in order to develop a policy-brief for field professionals working in prevention and health promotion                                             | 1, 5                     |
| Training in the use of PBS and other evidence data use- Level 2 – (NB: Level 1 being for basic knowledge) for field professionals working in prevention and health promotion | 1, 2, 3, 4, 5            |
| Diffusion of communication tools (newsletters, inserts, etc.) highlighting research results                                                                                  | 1, 2, 3, 4, 5            |
| Reflexive working groups/journal clubs about policy-briefs conception and appropriation: critical analysis, analysis of transferability and practical examples               | 1, 3, 4, 5               |
| Organisation of a regular meeting between stakeholders and researchers, to discuss about research production and field needs, in order to be aware of issues of both parts   | 3, 4, 5                  |

**Expected outcomes:**

- 1: Field professionals working in prevention and health promotion highlight PBS data use in their productions (presentations, reports, schemes, etc.)
- 2: Field professionals working in prevention and health promotion state evidence use (including PBS data use) in the conventions they have with funders and collaborators.
- 3: Field professionals working in prevention and health promotion use PBS data when developing their field projects.
- 4: Field professionals working in prevention and health promotion use PBS data when writing the action reports they send to funders.
- 5: IREPS teams adopt a shared culture on evidence use.

| Activities to implement with ARS professionals and expected outcomes                                                                                                       |                          |
|----------------------------------------------------------------------------------------------------------------------------------------------------------------------------|--------------------------|
| <i>Activities</i>                                                                                                                                                          | <i>Expected Outcomes</i> |
| Formation for PBS and other evidence data use- Level 2 – (NB: Level 1 being for basic knowledge)                                                                           | 1, 2, 3                  |
| Reflexive working groups/journal clubs about policy-briefs conception and appropriation: critical analysis, analysis of transferability and practical examples             | 1, 2, 3                  |
| Organisation of a regular meeting between stakeholders and researchers, to discuss about research production and field needs, in order to be aware of issues of both parts | 1, 2                     |
| Diffusion of policy-briefs in the ARS                                                                                                                                      | 1, 2, 3, 4               |
| Redaction by the IREPS of notes based on PBS data and/or other evidence data or theoretical models in the call for proposals and conventions: political memo               | 2, 3, 4                  |
| To make official the collaboration between the ARS and the university research group “human health” (convention, charter, ...)                                             | 2, 3, 4                  |
| Diffusion of communication tools (newsletters, inserts, etc.) that highlight research results                                                                              | 4                        |
| Presentation of the process in the ARS: meetings with the director general, the executive committee, the management committee, etc.                                        | 4                        |
| Political memo for the director general                                                                                                                                    | 4                        |

**Expected outcomes :**

- 1: ARS professionals enhance PBS data in the documents, tools, etc. they produce (e.g. presentations, actions assessment, activities scheme, etc.)
- 2: Evidence (including PBS) requirement appears in the regional calls for projects
- 3: ARS professionals indicate evidence (including PBS) requirement in the conventional agreement they have with stakeholders
- 4: ARS teams adopt a shared culture on evidence use.

1  
2  
3  
4  
5  
6  
7  
8  
9  
10  
11  
12  
13  
14  
15  
16  
17  
18  
19  
20  
21  
22  
23  
24  
25  
26  
27  
28  
29  
30  
31  
32  
33  
34  
35  
36  
37  
38  
39  
40  
41  
42  
43  
44  
45  
46

| Activities to implement with stakeholders and expected outcomes                                                                                                        |                          | Activities to implement with CRSA professionals and expected outcomes                                                 |                          |
|------------------------------------------------------------------------------------------------------------------------------------------------------------------------|--------------------------|-----------------------------------------------------------------------------------------------------------------------|--------------------------|
| <i>Activities</i>                                                                                                                                                      | <i>Expected Outcomes</i> | <i>Activities</i>                                                                                                     | <i>Expected Outcomes</i> |
| Formation for stakeholders on evidence use and its adding value (Level 1)                                                                                              | 1, 2, 3                  | Installation of awareness areas for evidence use among board, committee’s presidents and prevention committee members | 1, 2                     |
| Formation for stakeholders on evidence use in relation with identified needs previously collected (for example according to a given population, theme, etc.) (Level 2) | 1, 2, 3                  |                                                                                                                       |                          |
| Methodological support for evidence use                                                                                                                                | 1, 2                     |                                                                                                                       |                          |
| Diffusion of communication tools (newsletters, inserts, etc.) that highlight research results and PBS                                                                  | 1, 2                     |                                                                                                                       |                          |
| Deliberative working group in order to develop a policy-brief for field professionals working in prevention and health promotion                                       | 1, 2, 3                  | Diffusion of policy briefs whose topics are in relation with the agenda of the prevention committee of the CRSA       | 1, 2                     |
| Reflexive working groups/journal clubs about policy-briefs conception and appropriation: critical analysis, analysis of transferability and practical examples         | 1, 2, 3                  |                                                                                                                       |                          |

**Expected outcomes :**  
 1: CRSA members adopt a shared culture on evidence use.  
 2: CRSA members include PBS data in the notices they deliver

**Expected outcomes :**  
 1: Stakeholders use PBS data when applying to calls for projects as well as in the actions funded on pluri-annual conventions they develop  
 2: Stakeholders use PBS data when developing their projects  
 3: Proximity advisors are able to help stakeholders with evidence use

KT: Knowledge transfer; IREPS: Instance Régionale d’Education et de Promotion de la Santé, Regional Authority of education and health promotion; ARS: Agence Régionale de santé, Regional health agency; CRSA: Conférence Régionale de la Santé et de l’autonomie - an advisory organism involved in regional health politics set up; PBS: Stratégies d’Intervention en Prévention, knowledge documents named “intervention strategies in prevention”.

1  
2  
3  
4  
5  
6  
7  
8  
9  
10  
11  
12  
13  
14  
15  
16  
17  
18  
19  
20  
21  
22  
23  
24  
25  
26  
27  
28  
29  
30  
31  
32  
33  
34  
35  
36  
37  
38  
39  
40  
41  
42  
43  
44  
45  
46  
47  
48  
49  
50  
51  
52  
53  
54  
55  
56  
57  
58  
59  
60

For peer review only



1  
2  
3  
4  
5  
6  
7  
8  
9  
10  
11  
12  
13  
14  
15  
16  
17  
18  
19  
20  
21  
22  
23  
24  
25  
26  
27  
28  
29  
30  
31  
32  
33  
34  
35  
36  
37  
38  
39  
40  
41  
42  
43  
44  
45  
46  
47  
48  
49  
50  
51  
52  
53  
54  
55  
56  
57  
58  
59  
60

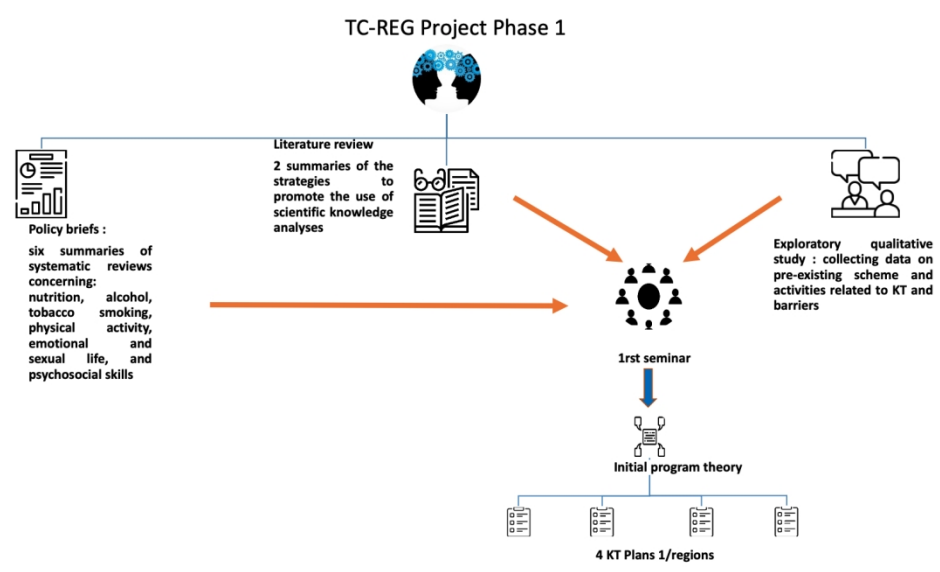

TC-REG Project Phase 1

602x357mm (72 x 72 DPI)

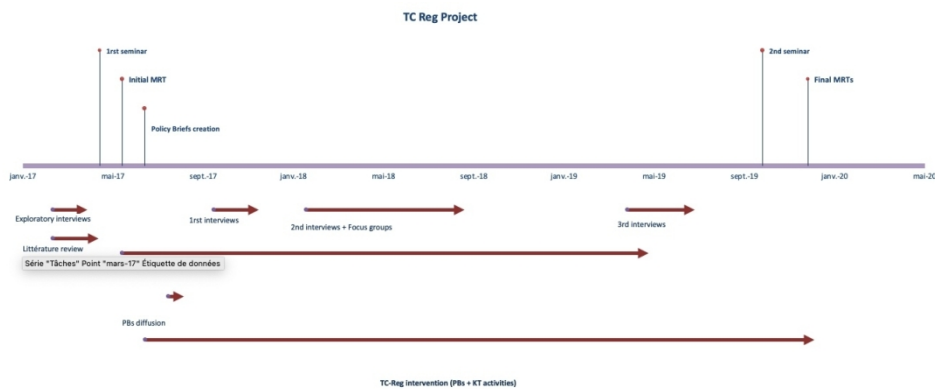

TC-REG project timeline

504x208mm (72 x 72 DPI)



| TITLE                      |                                                                                                                                                                                                                                                                                                                                                                                                                                                                                                                                                                                                                                                                                                                                                                                              | Reported in document Y/N/Unclear | Page(s) in document |
|----------------------------|----------------------------------------------------------------------------------------------------------------------------------------------------------------------------------------------------------------------------------------------------------------------------------------------------------------------------------------------------------------------------------------------------------------------------------------------------------------------------------------------------------------------------------------------------------------------------------------------------------------------------------------------------------------------------------------------------------------------------------------------------------------------------------------------|----------------------------------|---------------------|
| 1                          | In the title, identify the document as a realist evaluation                                                                                                                                                                                                                                                                                                                                                                                                                                                                                                                                                                                                                                                                                                                                  | Y                                | 1                   |
| <b>SUMMARY OR ABSTRACT</b> |                                                                                                                                                                                                                                                                                                                                                                                                                                                                                                                                                                                                                                                                                                                                                                                              |                                  |                     |
| 2                          | Journal articles will usually require an abstract, while reports and other forms of publication will usually benefit from a short summary. The abstract or summary should include brief details on: the policy, programme or initiative under evaluation; programme setting; purpose of the evaluation; evaluation question(s) and/or objective(s); evaluation strategy; data collection, documentation and analysis methods; key findings and conclusions Where journals require it and the nature of the study is appropriate, brief details of respondents to the evaluation and recruitment and sampling processes may also be included Sufficient detail should be provided to identify that a realist approach was used and that realist programme theory was developed and/or refined | Y                                | 2                   |
| <b>INTRODUCTION</b>        |                                                                                                                                                                                                                                                                                                                                                                                                                                                                                                                                                                                                                                                                                                                                                                                              |                                  |                     |
| 3                          | Rationale for evaluation                                                                                                                                                                                                                                                                                                                                                                                                                                                                                                                                                                                                                                                                                                                                                                     | Y                                | 4                   |
| 4                          | Programme theory                                                                                                                                                                                                                                                                                                                                                                                                                                                                                                                                                                                                                                                                                                                                                                             | Y                                | 4&9                 |
| 5                          | Evaluation questions, objectives and focus                                                                                                                                                                                                                                                                                                                                                                                                                                                                                                                                                                                                                                                                                                                                                   | Y                                | 5                   |
| 6                          | Ethical approval                                                                                                                                                                                                                                                                                                                                                                                                                                                                                                                                                                                                                                                                                                                                                                             | Y                                | 2 and 28            |
| <b>METHODS</b>             |                                                                                                                                                                                                                                                                                                                                                                                                                                                                                                                                                                                                                                                                                                                                                                                              |                                  |                     |
| 7                          | Rationale for using realist evaluation                                                                                                                                                                                                                                                                                                                                                                                                                                                                                                                                                                                                                                                                                                                                                       | Y                                | 8                   |
| 8                          | Environment surrounding the evaluation                                                                                                                                                                                                                                                                                                                                                                                                                                                                                                                                                                                                                                                                                                                                                       | Y                                | 6                   |
| 9                          | Describe the programme policy, initiative or product evaluated                                                                                                                                                                                                                                                                                                                                                                                                                                                                                                                                                                                                                                                                                                                               | Y                                | 9                   |
| 10                         | Describe and justify the evaluation design                                                                                                                                                                                                                                                                                                                                                                                                                                                                                                                                                                                                                                                                                                                                                   | Y                                | 7 & 12              |
| 11                         | Data collection methods                                                                                                                                                                                                                                                                                                                                                                                                                                                                                                                                                                                                                                                                                                                                                                      | Y                                | 11&12               |
| 12                         | Recruitment process and sampling strategy                                                                                                                                                                                                                                                                                                                                                                                                                                                                                                                                                                                                                                                                                                                                                    | Y                                | 8                   |
| 13                         | Data analysis                                                                                                                                                                                                                                                                                                                                                                                                                                                                                                                                                                                                                                                                                                                                                                                | Y                                | 19&20               |
| <b>RESULTS</b>             |                                                                                                                                                                                                                                                                                                                                                                                                                                                                                                                                                                                                                                                                                                                                                                                              |                                  |                     |
| 14                         | Details of participants                                                                                                                                                                                                                                                                                                                                                                                                                                                                                                                                                                                                                                                                                                                                                                      | Y                                | 9&12-18             |
| 15                         | Main findings                                                                                                                                                                                                                                                                                                                                                                                                                                                                                                                                                                                                                                                                                                                                                                                | Y                                | 21-24               |
| <b>DISCUSSION</b>          |                                                                                                                                                                                                                                                                                                                                                                                                                                                                                                                                                                                                                                                                                                                                                                                              |                                  |                     |
| 16                         | Summary of findings                                                                                                                                                                                                                                                                                                                                                                                                                                                                                                                                                                                                                                                                                                                                                                          | Y                                | 28                  |
| 17                         | Strengths, limitations and future directions                                                                                                                                                                                                                                                                                                                                                                                                                                                                                                                                                                                                                                                                                                                                                 | Y                                | 30                  |
| 18                         | Comparison with existing literature                                                                                                                                                                                                                                                                                                                                                                                                                                                                                                                                                                                                                                                                                                                                                          | Y                                | 23-25               |
| 19                         | Conclusion and recommendations                                                                                                                                                                                                                                                                                                                                                                                                                                                                                                                                                                                                                                                                                                                                                               | Y                                | 24-27&31            |
| 20                         | Funding and conflict of interest                                                                                                                                                                                                                                                                                                                                                                                                                                                                                                                                                                                                                                                                                                                                                             | Y                                | 3                   |

## STUDY PROTOCOL

## Open Access



# Evaluation of a knowledge transfer scheme to improve policy making and practices in health promotion and disease prevention setting in French regions: a realist study protocol

Linda Cambon<sup>1,2,7\*</sup> , Audrey Petit<sup>1</sup>, Valery Ridde<sup>3,4</sup>, Christian Dagenais<sup>5</sup>, Marion Porcherie<sup>1</sup>, Jeanine Pommier<sup>1</sup>, Christine Ferron<sup>6</sup>, Laetitia Minary<sup>2</sup> and François Alla<sup>2</sup>

## Abstract

**Background:** Evidence-based decision-making and practice are pivotal in public health. However, barriers do persist and they relate to evidence properties, organisations and contexts. To address these major knowledge transfer (KT) issues, we need to rethink how knowledge is produced and used, to enhance our understanding of decision-making processes, logics and mechanisms and to examine the ability of public health services to integrate research findings into their decisions and operations. This article presents a realist evaluation protocol to assess a KT scheme in prevention policy and practice at local level in France.

**Methods/design:** This study is a comparative multiple case study, using a realist approach, to assess a KT scheme in regional health agencies (ARS) and regional non-profit organisations for health education and promotion (IREPS), by analysing the configurations contexts/mechanisms/outcomes of it. The KT scheme assessed is designed for the use of six reviews of systematic reviews concerning the following themes: nutrition, alcohol, tobacco smoking, physical activity, emotional and sexual life and psychosocial skills. It combines the following activities: supporting the access to and the adaptation of scientific and usable evidences; strengthening professionals' skills to analyse, adopt and use the evidences in the course of their practices and their decision-making process; facilitating the use of evidence in the organisations and processes. RAMESE II reporting standards for realist evaluations was used.

**Discussion:** The aims of this study are to experiment and characterise the factors related to the scheme's ability to enable public health stakeholders to address the challenges of KT and to integrate scientific knowledge into policy and practice. We will use the realist approach in order to document the parameters of successful KT strategies in the specific contexts of preventive health services in France, while seeking to determine the transferability of such strategies.

**Keywords:** Knowledge transfer, Realist evaluation, Complex intervention, Prevention, Public health

\* Correspondence: Linda.cambon@ehesp.fr

<sup>1</sup>UMR 6051 (CRAPE-Arenes), EHESP, Paris, France

<sup>2</sup>EA 4360, APEMAC, Université de Lorraine, Nancy, France

Full list of author information is available at the end of the article



© The Author(s). 2017 **Open Access** This article is distributed under the terms of the Creative Commons Attribution 4.0 International License (<http://creativecommons.org/licenses/by/4.0/>), which permits unrestricted use, distribution, and reproduction in any medium, provided you give appropriate credit to the original author(s) and the source, provide a link to the Creative Commons license, and indicate if changes were made. The Creative Commons Public Domain Dedication waiver (<http://creativecommons.org/publicdomain/zero/1.0/>) applies to the data made available in this article, unless otherwise stated.

## Background

Evidence-based decision-making and practice are major issues in public health. For researchers, this means looking ahead to the dissemination of findings and integrating different types of knowledge and decision-making challenges [1]. It also implies greater collaboration between the research community and decision-makers [2]. Public health research issues have to be approached alongside societal and health issues too. It follows that evidence-based policy-making and planning in public health offer a way to improve the efficiency, credibility, and sustainability of health systems [1]. Furthermore, this can lead to a better social acceptance of the chosen decisions and interventions [3].

Despite the general agreement about the interest of evidence informed practices and policy-making (EIDM), barriers do persist in both the production and use of evidence. These barriers relate to people, organisations, contexts and properties of evidences [4]. To address this, it is necessary to rethink how knowledge is produced and used, to enhance our understanding of decision-making processes, logics and mechanisms and to examine the ability of public health services to integrate research findings into their decisions and operations. This requires a systemic approach, which includes the adaptation of scientific knowledge, the ability of users to capture, understand and apply the available evidence, as well as an accurate organisation and a supportive culture for using evidence. These are the major challenges of KT, defined by the National Public Health Institute of Quebec (INSPQ) as “the group of activities and interaction mechanisms that foster the dissemination, adoption and appropriation of the most up-to-date knowledge possible for use in professional practice and in healthcare management” [5].

### What stands in the way of the use of scientific evidence in public health?

In France, there is no formal and structural KT scheme. There are a few initiatives led by the National Public Health Agency (ANSP) and the National Cancer Institute (INCA), which for instance produce literature reviews. But policy-makers and prevention professionals do not use them. It confirms that a passive diffusion of knowledge is not effective, and the effectiveness of KT strategies depends on the context in which they are implemented [6–10]. The contextualization of the KT strategies is necessary to remove barriers to knowledge use. According to Gervais *et al.* [3, 11], KT research on decision-making processes offers a number of explanatory factors which may be classified in three categories. The first relates to the specific properties of the evidence itself: nature, availability, accessibility, quality and credibility (data and sources), intelligibility, ability to meet

needs, adaptability and transferability [3]. The second category relates to the personal characteristics of decision-makers: beliefs or personal values, political leanings, socio-demographics, level of education, previous experiences, motivation and ability to interpret data, etc. All of them may influence how new knowledge is addressed in the decision-making process.[12]. The third category refers to the characteristics of the organisations and local contexts in which knowledge producers and users work [4]: openness to change, material, human and financial resources available for KT, social and political context in the external environment, style of management, leadership, staffing, stakeholder coalitions, etc. Consequently, the multiple barriers to the adoption of evidence in the field of public health underline the non-linear process between knowledge production and knowledge use. If these barriers are to be overcome, we need to address all the parameters that affect the decision-making process. This is a focal point for KT research.

### The mechanisms of an effective knowledge transfer

Various strategies are available to overcome barriers to the use of KT. A recent work conducted by Langer *et al.* identified six mechanisms involved in effective KT:

- “Awareness” (M1) is defined as building awareness for, and positive attitudes toward, evidence-informed decision-making (EIDM). This mechanism emphasises the importance of decision-makers’ valuing the concept of EIDM.
- “Agree” (M2) is defined as the building mutual understanding and agreement on policy-relevant questions and the kind of evidence needed to answer them. This mechanism emphasises the importance of building mutual understanding and agreement on policy questions and what constitutes fit-for-purpose evidence.
- “Communication and access” is (M3) defined as providing communication of, and access to, evidence. This mechanism emphasises the importance of decision-makers receiving effective communication of evidence and convenient access to it.
- “Interact” (M4) is defined as the interaction between decision-makers and researchers. This mechanism emphasises the importance of decision-makers interacting with researchers in order to build trusted relationships based on mutual trust, collaborate, and gain exposure to a different type of social influence.
- “Skills” (M5) is defined as supporting decision-makers to develop skills in finding and making sense of evidence. This mechanism emphasises the importance of decision-makers’ having the necessary skills to identify, appraise, synthesise evidence, and integrate it with other information and political needs.



- “Structure and process” (M6) is defined as influencing decision-making structures and processes. This mechanism emphasises the importance of decision-makers’ psychological, social and environmental structures and processes (e.g. personal models, professional norms, habits, organisational and institutional rules) in providing means and barriers to action.

The authors underline that these strategies are effective if combined and contextualized in their implementation setting, confirming previous work of Ridde *et al.* [13] and Barwick [14]. Consequently, we hypothesize that in France, as elsewhere, simple diffusion and “one size fits all” strategies are not effective.

In this paper, we present the protocol of a realist evaluation study of knowledge transfer strategies implemented in the field of health prevention at a local level in France. We have used RAMESE II reporting standards for realist evaluations [15].

### Study objectives and location

The objective of the study is to identify the configurations contexts/mechanisms/outcomes of an effective KT scheme in local prevention sector. This study will be conducted in four French regions and within two types of organisation and their partners: regional health agencies (ARS), which are responsible for policy-making and prevention policies; and non-profit organisations (IREPS). IREPS develop health promotion and prevention programs and provide methodological supports to field professionals for the implementation of prevention interventions in different settings (work places, schools, care settings, recreation and community centres, rural or urban areas, etc.). ARS and IREPS work together to implement prevention and health policies in local contexts.

### Methods/design

We have reported this manuscript in line with the RAMESES II reporting standards for realist evaluation.

### Study design and conceptual framework

This study is a comparative multiple case study of a KT scheme in the field of health prevention using a realist approach [16, 17]. It concerns French public health services: ARS and IREPS. The case study design is the more suitable research strategy to investigate a phenomenon within its context and analyse this phenomenon’s interactions with several other elements relevant for our area of study [18].

The realist approach [17] is increasingly used for appraising the interactions between an intervention, its mechanisms and its contexts. The overall aim is to achieve a better understanding of an intervention’s

success factors and how these may be replicated in other contexts. This type of evaluation examines what works, under what conditions and for whom, based on a middle-range theory (or configurational theory) which describes the interactions between outcomes, mechanisms and contexts [17, 19]. Thus, realist evaluation integrates the paradigm of black box evaluation [20]. While the experimental paradigm evaluates effectiveness without appraising an intervention’s mechanisms of impact, realist evaluation answers the following question: did the intervention work according to the theory underpinning it? This type of evaluation seeks to understand the intervention by focusing on its mechanisms and the influence of context. The mechanism is defined in this case as the “part of a participant’s response to an intervention, generally hidden and sensitive to variations in context, and which produces effects” [21]. In realist evaluation, causality is generative, meaning that what generates the effect relates specifically to the interactions between context and cause (here, the intervention methods) [19]. However, as we will study the patterns between these interactions in different contexts, we hypothesise that it is possible to isolate key elements that may apply across a set of contexts. These findings will thus generate intermediate theories that will be sharpened little by little as each case will be investigated.

To conduct a realist evaluation, we alternate theoretical and empirical stages (Cf. Fig. 1: The realist sequences). According to Langer’s work [2] and many authors [7, 10, 13, 14, 22], we hypothesize that an effective KT scheme has to combine an access to and an adaption of knowledge, the development of professionals’ skills to analyse, adopt and transfer knowledge into their contexts, the improvement of organisations and processes in order to facilitate the integration of knowledge. We also conducted an exploratory qualitative study in the four regions to collect data on the pre-existing scheme and activities related to KT and the potential local barriers. The questions were the following: what kind of KT activities are possible (types, timeline, duration, management)? Who may be involved? What structural/organisational mechanisms would be affected? What contextual factors, outside the control of those involved, would need to be addressed? Data will be collected by means of semi-structured interviews with IREPS directors and ARS public health directors (8 people). Based on the behaviour change wheel theory [23] and an exploration of the behavioural theories used in KT strategies [24], we hypothesize that the change of which will occur in knowledge use may be notably due to the motivation to use knowledge, the perception of its usefulness and practicality and the ability to adapt it in to fit different settings.

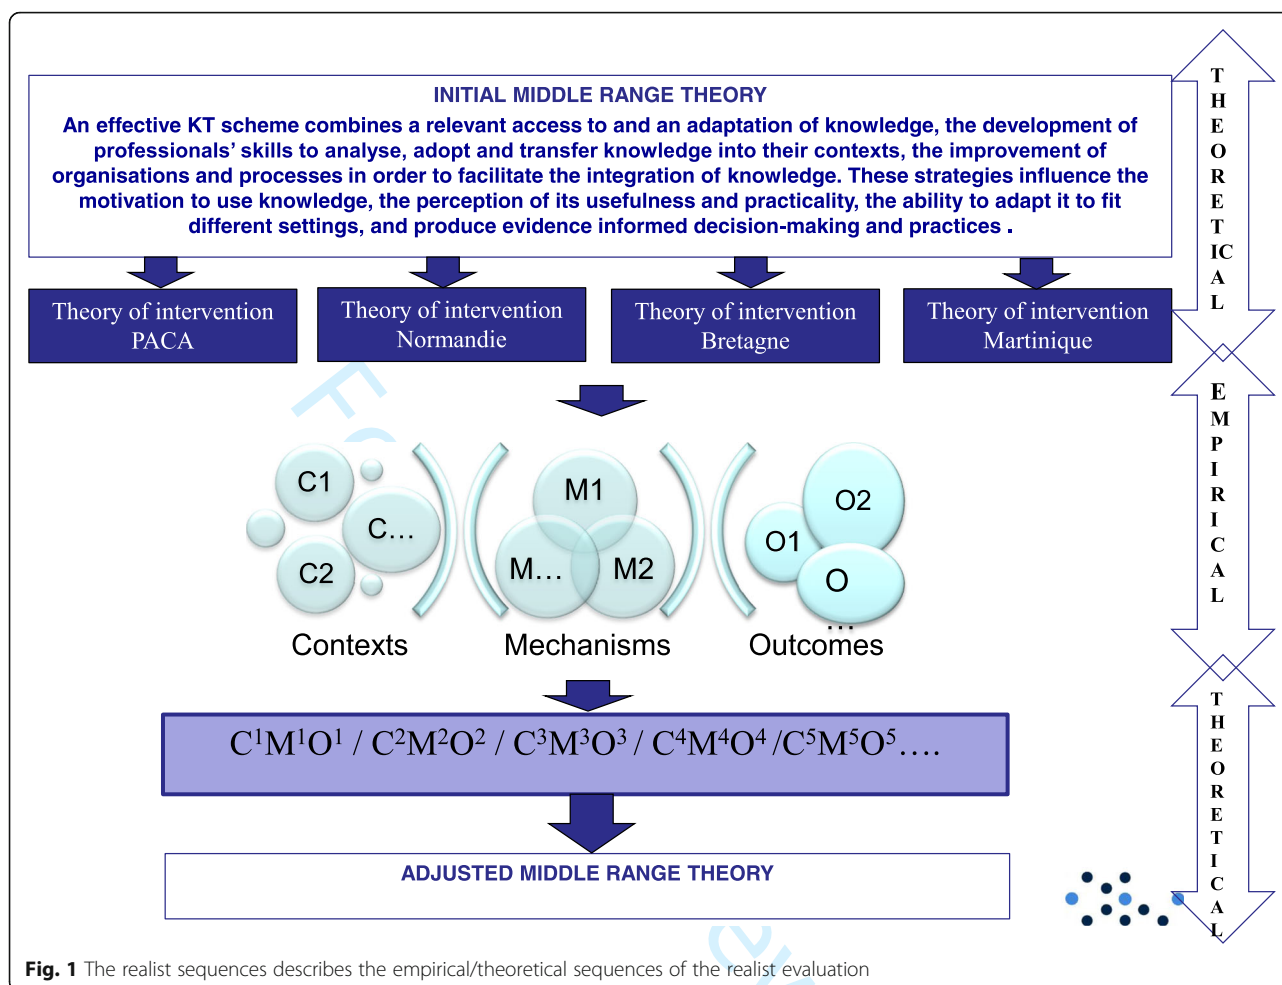

**Fig. 1** The realist sequences describes the empirical/theoretical sequences of the realist evaluation

According to all the above scientific literature, and to support our realist evaluation, we built an initial middle range theory, defined as following: “An effective KT scheme combines a relevant access to and an adaptation of knowledge, the development of professionals’ skills to analyse, adopt and transfer knowledge into their contexts, the improvement of organisations and processes in order to facilitate the integration of knowledge. These strategies influence the motivation to use knowledge, the perception of its usefulness and practicality, the ability to adapt it to fit different settings, and produce evidence informed decision-making and practices”.

This initial middle range theory leads to the design of four theories of intervention one for each region describing the interventions, the expected outcomes, the contexts’ parameters and the expected mechanisms. This work will be conducted in a preliminary 2-day workshop, gathering ARS and IREPS professionals. These theories will be applied in the 4 regions, for 12 months, and data will be collected in order to characterize the contexts, mechanisms and

outcomes and to determine the effective CMO configurations.

Finally, a cross-sectional analysis of the case studies will be conducted allowing us to identify potential regular CMO patterns, which would constitute an adjusted middle-range theory. The different stages are presented in Fig. 1 (Cf Fig. 1: The realist sequences).

**Intervention strategies**

The intervention is a KT scheme designed for the use of policy briefs (PBs), which will be written on the basis of six reviews of systematic reviews (completed by international guidelines); an international scientific committee have carried out these reviews. They concern the following themes: nutrition, alcohol, tobacco smoking, physical activity, emotional and sexual life and psychosocial skills. These themes are primary in France. They present effective prevention practices.

Based on the report entitled “The science of using science: researching the use of research evidence in decision-making” [25], the scheme combines the following activities:



- Supporting the access to and the adaptation of scientific and usable evidences especially the policy briefs.
- Strengthening professionals' skills to analyse, adopt and use the policy briefs in the course of their practices and their decision-making process (training, journal club, tutoring, etc.).
- Facilitating the use of evidence in the organisations and processes (collaborative workshops, normative processes, incentives, nudge, etc.).

According to the initial middle range theory and the 4 theories of change, professionals will make an action plan to apply them in their local settings. These KT activities will be set up over a 12-month period.

### Population

The targeted population is composed of prevention and public health services operating in French regions, namely, the ARS and IREPS and their partners. The study will focus on three groups of stakeholders:

- ARS public health professionals: five agents per region (deputy directors in charge of prevention, heads of strategy departments and project managers);
- IREPS professionals: ten people per region (directors, project managers and communication managers).
- Members of specialised prevention commissions within the Regional Conferences on Health and Autonomy (CRSA) and members of the Public Policy Coordination Commission (CCPP) both devoted to prevention in French regions (five people) and partners of IREPS and ARS.

We already have the agreement for the data collection given by the four ARS involved in the project since it began.

### Data collection

Data will be collected to document the support scheme's mechanisms and contexts parameters involved in effectiveness. They will be collected before the implementation of the KT scheme at the end and throughout the implementation. They will be collected on the 3 categories of people described before; 20 people per each region (80 at all).

Collected data will characterise the context, the mechanisms relating to the organisation and to the individuals involved, the PBs and the set-up for KT.

A description of data collected and how and they will be collected are presented in Tables 1 and 2, but these variables will be adjusted according to the four theories

of intervention and the action plans (Cf. Table 1 : Expected outcomes and Table 2 : Contexts and mechanisms expected).

Data will be collected by means of:

- Semi-structured interviews conducted with the above-mentioned population (20 people per region)
- The observation of health promotion meetings and collective events resulting from the scheme's implementation: project selection committees, selection processes, trainings, seminars, presentations etc. The aim of these observations is to study the types of interactions between the professionals who deal with KT strategies (for instance, leadership, uptake, bottom up or top down approaches).
- A documentary analysis (calls for project, action plans, projects applications, reports of meeting, etc.)

The observation and documentary analysis grids and the interview guideline will be designed based on the four intervention theories and tested on a sample of five stakeholders not involved in the process, but belonging to the IREPS network.

The collection will last 12 months.

### Data analysis

Data will be processed through a content analysis [26] defined as "A set of systematic and objective procedures for analysing communication processes in order to obtain indicators (quantitative or not) inferring knowledge related to the conditions (inferred variables) under which meaningful information is both sent and received". This analysis will code, classify and grade content in order to identify patterns, trends and specific features. We will use a software program called *Nvivo* to assist us in conducting and integrating a thematic analysis of the interviews and an analysis of the observation reports. The qualitative analysis will lead to:

- Document the uptake of evidence and the practice changes triggered by the intervention. This will be carried out on a case-per-case basis in monographic format, in order to identify the mechanisms at play, the degree of intervention, the contextual contingencies and the changes arising in the three types of knowledge use (instrumental, conceptual, persuasive).
- Identify the most regular CMO configurations by a cross-analysis of the different cases and a combination of the different data collected according to their linkage with the "context" meanings, "mechanism" meanings and "outcomes" meanings (cf Tables 1 and 2).

**Table 1** Expected outcomes

| Stakeholders | Outcomes                                                                                                                                                                   | Indicators                                                                                | Data collection                                                  |
|--------------|----------------------------------------------------------------------------------------------------------------------------------------------------------------------------|-------------------------------------------------------------------------------------------|------------------------------------------------------------------|
| ARS          | Agents use policy briefs (PBs) in discussions at committee level                                                                                                           | Number of verbatims per meetings<br>Type of PBs or extracts from PBs<br>Ways of using PBs | Semi-structured interview<br>Observation                         |
|              | Agents use evidences from PBs as criteria of project assessment                                                                                                            | Existing in assessment grids                                                              | Documentary analysis<br>Semi-structured interview                |
|              | Agents use evidences from PBs as part of conventional tools agreed between the ARS and its implementers (e.g. integration into specialised library and reference services) | Existence of mentioned PBs or extracts from PBs in documents<br>Ways of using PBs         | Documentary analysis<br>Semi-structured interview                |
|              | Agents advocate evidences from PBs in their productions (communications, reports, action plans, etc.)                                                                      | Number of communications, reports, action plans mentioning PBs or extracts from PBs       | Semi-structured interview<br>Observation<br>Documentary analysis |
|              | Professionals use evidences from PBs to design their projects                                                                                                              | Number of projects mentioning PBs or extracts from PBs<br>Ways of using PBs               | Semi-structured interview<br>Documentary analysis                |
| IREPS        | Professionals use evidences from PBs to evaluate their projects                                                                                                            | Number of evaluation based on PBs or extracts from PBs<br>Ways of using PBs               | Semi-structured interview<br>Documentary analysis                |
|              | Professionals use evidences from PBs to make reports to their sponsors                                                                                                     | Number of reporting based on PBs or extracts from PBs<br>Ways of using PBs                | Semi-structured interview<br>Documentary analysis                |
|              | Professionals use evidences from PBs in the methodological supports for field professionals                                                                                | Number of methodological supports based on PBs or extracts from PBs<br>Ways of using PBs  | Semi-structured interview<br>Observation                         |
|              | Professionals advocate evidences from PBs in their productions (communications, reports, action plans, etc.)                                                               | Number of communications, reports, action plans mentioning PBs or extracts from PBs       | Semi-structured interview<br>Observation<br>Documentary analysis |
|              | Professionals use evidences from PBs as part of conventional tools agreed with their                                                                                       | Existence of mentioned PBs or extracts from PBs in documents<br>Ways of using PBs         | Documentary analysis<br>Semi-structured interview                |

**Table 1** Expected outcomes (Continued)

|                     |                                                                                                          |                                                                                          |                                                                  |
|---------------------|----------------------------------------------------------------------------------------------------------|------------------------------------------------------------------------------------------|------------------------------------------------------------------|
|                     | sponsors, included ARS and partners.                                                                     |                                                                                          |                                                                  |
| Field professionals | Field professionals use evidences from PBs to design their projects                                      | Number of projects mentioning PBs or extracts from PBs<br>Ways of using PBs              | Semi-structured interview<br>Documentary analysis                |
|                     | Field professionals use evidences from PBs to design their conventional tools with partners and sponsors | Existence of mentioned PBs or extracts from PBs in documents<br>Ways of using PBs        | Documentary analysis<br>Semi-structured interview                |
| CRSA                | CRSA committee use evidences from PBs to make statements                                                 | Number of verbatim per meetings<br>Type of PBs or extracts from PBs<br>Ways of using PBs | Observation<br>Documentary analysis<br>Semi-structured interview |
| CCPP                | CCPP committee use evidences from PBs to design their partnership aim, their common projects             | Number of verbatim per meetings<br>Type of PBs or extracts from PBs<br>Ways of using PBs | Observation<br>Documentary analysis<br>Semi-structured interview |

Based on the observed elements, we will classify the outcomes in three categories of use as recorded in the literature [27, 28].

- Instrumental use: knowledge users draw on the IBs to make decisions or to change their practice;
- Conceptual use which implies changes in understanding and thinking inspired by the IBs;
- Persuasive use (also called strategic or symbolic use) which refers to a use of knowledge as a means to justify decisions or actions.

We will process these data to characterise the mechanisms identified in the intervention theory and induced by the intervention. This will enable us to answer the following questions about several mechanisms related to knowledge, people and organisations: (1) were they present in the contexts studied? (2) Did they positively or negatively influence the outcomes from a user's perspective? (3) Which mechanism(s) was (were) actually active (which parameter influenced which other parameter and/or which outcome)? (4) Which outcome(s) was (were) produced?

Then, a secondary middle range theory will then be developed, leading to future guidelines.

**Development of an adjusted middle range theory**

Based on this analysis, we will compare the CMO configurations, which will be identify with the initial middle range theory, and we will figure out an adjusted middle range theory. This work will be conducted during a

**Table 2** Contexts and mechanisms expected

| Types of variable          | CMO                                      | Types                                                              | Variables                                         | Questions                                                                                                                                                        | Data collection                                                                                                                                                                                                                     |                                                                                                                                                                       |                                                                  |                                                                                                                                                                                                                                                                            |                                                                  |
|----------------------------|------------------------------------------|--------------------------------------------------------------------|---------------------------------------------------|------------------------------------------------------------------------------------------------------------------------------------------------------------------|-------------------------------------------------------------------------------------------------------------------------------------------------------------------------------------------------------------------------------------|-----------------------------------------------------------------------------------------------------------------------------------------------------------------------|------------------------------------------------------------------|----------------------------------------------------------------------------------------------------------------------------------------------------------------------------------------------------------------------------------------------------------------------------|------------------------------------------------------------------|
| Context in each region (C) |                                          | Relating to regional policy-making and policy action on prevention | Leadership                                        | Type of management<br>Type of management structuring                                                                                                             | Observation<br>Documentary analysis<br>Semi-structured interview                                                                                                                                                                    |                                                                                                                                                                       |                                                                  |                                                                                                                                                                                                                                                                            |                                                                  |
|                            |                                          |                                                                    | How public health is organised                    | Funders<br>Types of funding ways (competitive call for project, conventional agreement, etc.)<br>Assessment of actions<br>Main partnership between stakeholders. | Observation<br>Documentary analysis<br>Semi-structured interview                                                                                                                                                                    |                                                                                                                                                                       |                                                                  |                                                                                                                                                                                                                                                                            |                                                                  |
|                            |                                          |                                                                    | Support mechanisms for stakeholders/practitioners | Types of supporting process<br>Who support the practitioners<br>Who are supported<br>Who fund the supporting activities                                          | Observation<br>Documentary analysis<br>Semi-structured interview                                                                                                                                                                    |                                                                                                                                                                       |                                                                  |                                                                                                                                                                                                                                                                            |                                                                  |
|                            |                                          |                                                                    | Opportunities                                     | Opportunities to work with researchers, to use evidences from researchers in practices                                                                           | Observation<br>Documentary analysis<br>Semi-structured interview                                                                                                                                                                    |                                                                                                                                                                       |                                                                  |                                                                                                                                                                                                                                                                            |                                                                  |
|                            |                                          |                                                                    |                                                   | Collaborative                                                                                                                                                    | Experiences of collaborating work with researchers<br>Assessment of them                                                                                                                                                            | Observation<br>Documentary analysis<br>Semi-structured interview                                                                                                      |                                                                  |                                                                                                                                                                                                                                                                            |                                                                  |
|                            |                                          |                                                                    |                                                   | Specific decision-making and operational process                                                                                                                 | Description of decision-making process<br>Description of designing, setting and assessment of interventions                                                                                                                         | Observation<br>Documentary analysis<br>Semi-structured interview                                                                                                      |                                                                  |                                                                                                                                                                                                                                                                            |                                                                  |
|                            |                                          | Parameters influencing the use of the PBs                          | Mechanisms (M)                                    | Relating to the PBs                                                                                                                                              | Acceptability of PBs                                                                                                                                                                                                                | Closeness between practices and PBs recommendations<br>Convenience of PBs with context and practices<br>Credibility perceived of PBs<br>Other mechanisms not expected | Observation<br>Documentary analysis<br>Semi-structured interview |                                                                                                                                                                                                                                                                            |                                                                  |
|                            |                                          |                                                                    |                                                   |                                                                                                                                                                  | Relating to stakeholders/professionals                                                                                                                                                                                              |                                                                                                                                                                       |                                                                  | Ability to integrate new practices in the context, in the habits (capabilities)                                                                                                                                                                                            | Observation<br>Documentary analysis<br>Semi-structured interview |
|                            |                                          |                                                                    |                                                   |                                                                                                                                                                  |                                                                                                                                                                                                                                     |                                                                                                                                                                       |                                                                  | Interest from PBS using<br>Culture of change existing (previous experiences, awareness, agreement)<br>Motivation of using PBs<br>Levels of interaction between researchers and practitioners to discuss about evidence-informed practices<br>Other mechanisms not expected |                                                                  |
|                            |                                          |                                                                    |                                                   | Relating to organisations                                                                                                                                        | Changes in ability to evolve (opportunities in functioning, hierarchical agreement, etc.)<br>Temporality (opportunity to take time to introduce new knowledge coming from PBs)<br>Other blocking or driving mechanisms not expected | Observation<br>Documentary analysis<br>Semi-structured interview                                                                                                      |                                                                  |                                                                                                                                                                                                                                                                            |                                                                  |
| Others                     | Other mechanisms not envisaged initially |                                                                    |                                                   | Observation<br>Documentary analysis                                                                                                                              |                                                                                                                                                                                                                                     |                                                                                                                                                                       |                                                                  |                                                                                                                                                                                                                                                                            |                                                                  |

**Table 2** Contexts and mechanisms expected (*Continued*)

|                   |                                 |                                                                                                                                                                                                                                                                                                                                         |                                                                                               |
|-------------------|---------------------------------|-----------------------------------------------------------------------------------------------------------------------------------------------------------------------------------------------------------------------------------------------------------------------------------------------------------------------------------------|-----------------------------------------------------------------------------------------------|
| Conduct of the KT | Intervention (I) set up locally | Type of KT activity set up locally<br>Duration of these activities (action plans)<br>Types of activity carried out<br>Stage of completion of the expected activities<br>Contributors involved in KT strategies<br>Partnerships involved in KT strategies<br>Financial resources in KT strategies<br>Material resources in KT strategies | Semi-structured interview<br>Observation<br>Documentary analysis<br>Semi-structured interview |
|-------------------|---------------------------------|-----------------------------------------------------------------------------------------------------------------------------------------------------------------------------------------------------------------------------------------------------------------------------------------------------------------------------------------|-----------------------------------------------------------------------------------------------|

second interdisciplinary workshop, based on a discussion about analysis from data collected, gathering all ARS staff responsible for prevention and public health, IREPS directors and project officers, plus agents from ANSP and INCA.

KT development guidelines in France will emerge from this meeting.

#### Communication and dissemination of results

Different types of actors will be involved throughout the study: prevention professionals, policy-makers and researchers. Thus, multiple methods will be used to communicate research results:

- Developing short and practical policy briefs about knowledge transfer to national policy-makers and practitioners
- Delivering presentations at local, national meetings in France and relevant international meetings for professionals and researchers
- Regular project review meetings and continuous engagement with key decision-makers and practitioners, in particular as part of the Public Health Initiative for the Interaction between Research, Intervention and Decision-*Initiative en Santé Publique pour l'Interaction entre la Recherche, l'Intervention et la Décision* (InSPIRe-ID), a knowledge transfer consortium, led by the French Ministry of Health.
- Delivering presentations at national and international conferences and publishing articles in peer-reviewed academic journals with emphasis on open access
- Developing a project research report for the funder, with a publishable executive summary

#### Discussion

This article describes a protocol using a realist design to understand how a KT scheme works, for whom and in what circumstances. In research, realist evaluation is valuable for evaluating interventions in their contexts; it addresses contextual factors in relation to the

mechanisms and outcomes of these interventions. Thus, partial patterns can be revealed to explain how interventions may foster enhanced KT.

However, even if there is weak support in France to develop KT at a local level, KT is highly recommended by health national authorities. Consequently, we need to address a potential social desirability bias, resulting both from the subject and the fact that the data are not self-reported [28]. This bias results from the tendency of survey respondents to answer questions in a manner that will be viewed favorably by others. Moreover, we will design the interventional scheme with the different stakeholders. Researchers are thus involved in the assessed process. This contextual parameter must be taken into account in the evaluation.

The aim of this study is to experiment and characterise the success factors of a KT scheme in health promotion and disease prevention settings. By success, we mean the scheme's ability to (1) enable public health stakeholders to address the challenges of KT and (2) bring about changes in public health policy and practice: integration of evidence-informed public health, collaborative practices etc. We will seek to explain the parameters and conditions of these strategies in order to determine their transferability into other contexts. This will provide a basis for the production of operational and contextualised guidelines in order to develop KT to inform regional policy-making on health promotion and disease prevention. Ultimately, this research aims at enhancing overall policy-making and quality of implementation in the sector. With this in mind, this project will be of great interest for public policy-makers who are currently moving towards evidence-informed health promotion and disease prevention in France.

#### Abbreviations

ANSP: Agence Nationale de Santé Publique (National Agency for Public Health); ARS: Agence Régionale de Santé (Regional Health Agency); CCPP: Commission de Coordination des Politiques Publiques (Public Policy Coordination Committee); CRSA: Conférence Régionale de la Santé et de l'Autonomie (Regional Conference on Health and Autonomy); FNES: Fédération Nationale d'Éducation et de promotion de la Santé (National Federation for Health Education and Promotion); I: Intervention; IB: Intervention brief; INCa: Institut National du Cancer (National Cancer



Institute); InSPIRE-ID: Initiative en Santé Publique Pour l'Interaction entre la Recherche, l'Intervention et la Décision (a public health initiative dealing with the interaction between research, intervention and decision-making); INSPQ: Institut National de santé publique du Québec (Quebec Public Health Expertise and Reference Centre); IREPS: Instance Régionale d'Éducation et de Promotion de la Santé (a non-profit organisation promoting health at a regional level); KT: Knowledge translation; PACA: Provence-Alpes-Côte-d'Azur (region in the south of France)

#### Acknowledgements

The authors are very grateful to all those who took part in the project especially the members of the regional support teams and the Fédération Nationale d'Éducation pour la Santé.

#### Funding

This research has received funding from a national recognized research agency; the IReSP. This funding has been obtained via a national competitive peer review grant application process, named "2016 General call for projects—Prevention" (No., CAMBON-AAP16-PREV-11).

#### Availability of data and materials

Not applicable

#### Authors' contributions

LC and AP drafted this article and all authors revised the manuscript. The project design was developed by LC and AP. LM, FA, JP, MP and CF were involved in implementing the project and in developing the evaluation design. VR and CD were involved in the design of the middle range theory. All authors read and approved the final manuscript.

#### Competing interests

The authors declare that they have no competing interests.

#### Consent for publication

Not applicable

#### Ethics approval and consent to participate

The project will be carried out with full respect of current relevant legislation (e.g. the Charter of Fundamental Rights of the EU) and international conventions (e.g. Helsinki Declaration). The methods development, data collection and analysis will take account of the following issues:

- Anonymity of study respondents will be preserved and ensured at all times as respondent(s) request. Unnecessary collection of personal data will be avoided, and respondents will have the right to review outputs and withdraw consent. All personal data will be coded, removed from the data for analysis and stored separately. Only designated research staff will have access to the keys linking the data with the personal information.
- Informed consent will be obtained from all study participants, and in the case of refusal, alternative means of data collection will be explored (e.g. alternative respondents).

In addition, this study has received approval from the national agency for data protection *Commission Nationale Informatique et Libertés* (NS no. 43, registered under number 2028640 v 0).

#### Publisher's Note

Springer Nature remains neutral with regard to jurisdictional claims in published maps and institutional affiliations.

#### Author details

<sup>1</sup>UMR 6051 (CRAPE-Arenes), EHESP, Paris, France. <sup>2</sup>EA 4360, APEMAC, Université de Lorraine, Nancy, France. <sup>3</sup>Department of Social and Preventive Medicine, University of Montreal School of Public Health (ESPM), Montreal, Canada. <sup>4</sup>University of Montreal Public Health Research Institute (IRSPUM), Montreal, Canada. <sup>5</sup>Department of Psychology, University of Montreal, Montreal, Canada. <sup>6</sup>Fédération Nationale d'Éducation et de promotion de la Santé (FNES), Paris, France. <sup>7</sup>EHESP, Paris, France.

Received: 11 May 2017 Accepted: 15 June 2017

Published online: 29 June 2017

#### References

1. Alla F, Cambon L. Recherche interventionnelle en santé publique, transfert de connaissances et collaboration entre acteurs, décideurs et chercheurs. *Quest Santé Publique*. 2014;12:1–4.
2. Langer L, Tripney J, Gough D. The science of using science: researching the use of research evidence in decision-making. London : EPPI-Centre, Social Science Research Unit, UCL Institute of Education, University College London; 2016.
3. Gervais MJ, Chagnon F. Modélisation des déterminants et des retombées de l'application des connaissances issues de la recherche psychosociale. Québec: Fonds québécois de recherche sur la société et la culture; 2010. p. 85.
4. Gervais M, Gagnon F, Bergeron P. Les conditions de mise à profit des connaissances par les acteurs de santé publique lors de la formulation des politiques publiques : L'apport de la littérature sur le transfert des connaissances. Montréal : Chaire d'Étude CJM-IU-UQAM; 2013.
5. Castiglione S, Ritchie J. Passer à l'action : nous connaissons les pratiques que nous souhaitons changer. Que faire, maintenant? Guide de mise en oeuvre pour les professionnels de la santé [Internet]. Instituts de Recherche en Santé du Canada; 2012 [cited 2017 Feb 28]. Available from: <http://www.cih-irsc.gc.ca/f/45669.html>
6. Landry R, Amara N, Lamari M. Utilization of social science research knowledge in Canada. *Res Policy*. 2001;30:333–49.
7. Dagenais C, Ridde V, Laurendeau M-C, Souffez K. Knowledge translation research in population health: establishing a collaborative research agenda. *Health Res Policy Syst*. 2009;7:28.
8. Grol R. Successes and failures in the implementation of evidence-based guidelines for clinical practice. *Med Care*. 2001;39:146–54.
9. Grol R, Grimshaw J. From best evidence to best practice: effective implementation of change in patients' care. *Lancet*. 2003;362:1225–30.
10. LaRocca R, Yost J, Dobbins M, Ciliska D, Butt M. The effectiveness of knowledge translation strategies used in public health: a systematic review. *BMC Public Health*. 2012;12:751.
11. Gervais MJ, Gagnon F, Bergeron P. Les conditions de mise à profit des connaissances par les acteurs de santé publique lors de la formulation des politiques publiques : l'apport de la littérature sur le transfert des connaissances. Montréal: Chaire d'étude CJM- IU-UQAM sur l'application des connaissances dans le domaine des jeunes et des familles en difficulté; 2013.
12. Jabot F. L'évaluation des politiques publiques : cadres conceptuel et étude de son utilisation par les décideurs des institutions régionales de santé en France [Internet]. Université de Lorraine; 2014 [cited 2017 Feb 14]. Available from: <http://www.theses.fr/2014LORR0201>
13. Ridde V, Dagenais C, Boileau-Falardeau M. Une synthèse exploratoire du courtage en connaissance en santé publique. *Santé Publique*. 2013;25(2):137–45.
14. Barwick MA, Peters J, Boydell K. Getting to uptake: Do communities of practice support the implementation of evidence-based practice? *J Can Acad Child Adolesc Psychiatry*. 2009;18:16–29.
15. Wong G, Westhorp G, Manzano A, Greenhalgh J, Jagosh J, Greenhalgh T. RAMESES II reporting standards for realist evaluations. *BMC Med*. 2016;14(1):96.
16. Pawson R. Evidence-based policy: a realist perspective. 2006.
17. Pawson R, Tilley N. Realistic Evaluation. London: Sage Publications Ltd; 1997.
18. Yin RK. Case Study Research: Design and Methods. 5th ed. Los Angeles: SAGE Publications, Inc; 2013. p. 312.
19. Blaise P, Marchal B, Lefèvre P, Kegels G. Au-delà des méthodes expérimentales : l'approche réaliste en évaluation. In: Potvin L, Moquet M-J, Jones C, editors. Réduire les inégalités sociales de santé. Saint-Denis: INPES; 2010. p. 285–96.
20. Salter KL, Kothari A. Using realist evaluation to open the black box of knowledge translation: a state-of-the-art review. *Implement Sci IS*. 2014;9:115.
21. Ridde V, Robert E, Guichard A, Blaise P, van Olmen J. L'approche réaliste à l'épreuve du réel de l'évaluation des programmes. *Can J Program Eval*. 2012;26(3):37–59.
22. Tchameni Ngamo S, Souffez K, Lord C, Dagenais C. Do knowledge translation (KT) plans help to structure KT practices? *Health Res Policy Syst*. 2016;14:46.
23. Michie S, Van Stralen MM, West R. The behaviour change wheel: A new method for characterising and designing behaviour change interventions. *Implement Sci*. 2011;6:42.

- 1  
2  
3  
4  
5  
6  
7  
8  
9  
10  
11  
12  
13  
14  
15  
16  
17  
18  
19  
20  
21  
22  
23  
24  
25  
26  
27  
28  
29  
30  
31  
32  
33  
34  
35  
36  
37  
38  
39  
40  
41  
42  
43  
44  
45  
46  
47  
48  
49  
50  
51  
52  
53  
54  
55  
56  
57  
58  
59  
60
24. Wehn U, Montalvo C. Knowledge transfer dynamics and innovation: behaviour, interactions and aggregated outcomes. *J Clean Prod.* 2016. [cited 2017 May 10]; Available from: <http://linkinghub.elsevier.com/retrieve/pii/S0959652616315396>.
  25. Langer L, Tripney J, Gough D. *The science of using science: researching the use of research evidence in decision-making.* London: EPPI-Centre, Social Science Research Unit, UCL Institute of Education: University College London; 2016.
  26. Bardin L. *L'analyse de contenu.* 2nd ed. Paris: PUF; 2013.
  27. Straus SE, Tetroe J, Graham ID, Zwarenstein M, Bhattacharyya O, Shepperd S. Monitoring use of knowledge and evaluating outcomes. *CMAJ Can Med Assoc J.* 2010;182(2):E94–8.
  28. Nass C, Moon Y, Carney P. Are respondents polite to computers? Social desirability and direct responses to computers. *J Appl Soc Psychol.* 1999; 29(5):1093–110.

For peer review only

Submit your next manuscript to BioMed Central and we will help you at every step:

- We accept pre-submission inquiries
- Our selector tool helps you to find the most relevant journal
- We provide round the clock customer support
- Convenient online submission
- Thorough peer review
- Inclusion in PubMed and all major indexing services
- Maximum visibility for your research

Submit your manuscript at  
[www.biomedcentral.com/submit](http://www.biomedcentral.com/submit)

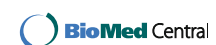

# BMJ Open

## Evaluation of a knowledge translation strategy to improve policy making and practices in health promotion and disease prevention setting in French regions: TC-REG, a realist study

|                                 |                                                                                                                                                                                                                                                                                                                                                                                                                                                                                                                                                                                                                                                                                                                                                                                                                                                                                   |
|---------------------------------|-----------------------------------------------------------------------------------------------------------------------------------------------------------------------------------------------------------------------------------------------------------------------------------------------------------------------------------------------------------------------------------------------------------------------------------------------------------------------------------------------------------------------------------------------------------------------------------------------------------------------------------------------------------------------------------------------------------------------------------------------------------------------------------------------------------------------------------------------------------------------------------|
| Journal:                        | <i>BMJ Open</i>                                                                                                                                                                                                                                                                                                                                                                                                                                                                                                                                                                                                                                                                                                                                                                                                                                                                   |
| Manuscript ID                   | bmjopen-2020-045936.R2                                                                                                                                                                                                                                                                                                                                                                                                                                                                                                                                                                                                                                                                                                                                                                                                                                                            |
| Article Type:                   | Original research                                                                                                                                                                                                                                                                                                                                                                                                                                                                                                                                                                                                                                                                                                                                                                                                                                                                 |
| Date Submitted by the Author:   | 26-Aug-2021                                                                                                                                                                                                                                                                                                                                                                                                                                                                                                                                                                                                                                                                                                                                                                                                                                                                       |
| Complete List of Authors:       | Martin-Fernandez, Judith; INSERM Bordeaux Population Health Research Center, UMR 1219, CIC1401-EC,, University of Bordeaux, ISPED,; CHU de Bordeaux<br>Aromatario, Olivier ; ISPED, University of Bordeaux; INSERM Bordeaux Population Health Research Center, UMR 1219, CIC1401-EC,, University of Bordeaux, ISPED,<br>Prigent, Ollivier; INSERM Bordeaux Population Health Research Center, UMR 1219, CIC1401-EC,, University of Bordeaux, ISPED,; ISPED, University of Bordeaux<br>Porcherie, Marion; Ecole des Hautes Etudes en Sante Publique, Sciences Humaines et Sociales UMR CNRS 6051<br>Ridde, Valéry ; CEPED, Institute for Research on Sustainable Development, IRD-Université de Paris, ERL INSERM SAGESUD<br>Cambon, Linda; ISPED, Chaire de prévention ; INSERM Bordeaux Population Health Research Center, UMR 1219, CIC1401-EC,, University of Bordeaux, ISPED, |
| <b>Primary Subject Heading</b>: | Public health                                                                                                                                                                                                                                                                                                                                                                                                                                                                                                                                                                                                                                                                                                                                                                                                                                                                     |
| Secondary Subject Heading:      | Evidence based practice                                                                                                                                                                                                                                                                                                                                                                                                                                                                                                                                                                                                                                                                                                                                                                                                                                                           |
| Keywords:                       | PUBLIC HEALTH, Organisation of health services < HEALTH SERVICES ADMINISTRATION & MANAGEMENT, Change management < HEALTH SERVICES ADMINISTRATION & MANAGEMENT, PREVENTIVE MEDICINE                                                                                                                                                                                                                                                                                                                                                                                                                                                                                                                                                                                                                                                                                                |
|                                 |                                                                                                                                                                                                                                                                                                                                                                                                                                                                                                                                                                                                                                                                                                                                                                                                                                                                                   |

SCHOLARONE™  
Manuscripts



I, the Submitting Author has the right to grant and does grant on behalf of all authors of the Work (as defined in the below author licence), an exclusive licence and/or a non-exclusive licence for contributions from authors who are: i) UK Crown employees; ii) where BMJ has agreed a CC-BY licence shall apply, and/or iii) in accordance with the terms applicable for US Federal Government officers or employees acting as part of their official duties; on a worldwide, perpetual, irrevocable, royalty-free basis to BMJ Publishing Group Ltd ("BMJ") its licensees and where the relevant Journal is co-owned by BMJ to the co-owners of the Journal, to publish the Work in this journal and any other BMJ products and to exploit all rights, as set out in our [licence](#).

The Submitting Author accepts and understands that any supply made under these terms is made by BMJ to the Submitting Author unless you are acting as an employee on behalf of your employer or a postgraduate student of an affiliated institution which is paying any applicable article publishing charge ("APC") for Open Access articles. Where the Submitting Author wishes to make the Work available on an Open Access basis (and intends to pay the relevant APC), the terms of reuse of such Open Access shall be governed by a Creative Commons licence – details of these licences and which [Creative Commons](#) licence will apply to this Work are set out in our licence referred to above.

Other than as permitted in any relevant BMJ Author's Self Archiving Policies, I confirm this Work has not been accepted for publication elsewhere, is not being considered for publication elsewhere and does not duplicate material already published. I confirm all authors consent to publication of this Work and authorise the granting of this licence.



1  
2  
3  
4  
5  
6  
7  
8  
9  
10  
11  
12  
13  
14  
15  
16  
17  
18  
19  
20  
21  
22  
23  
24  
25  
26  
27  
28  
29  
30  
31  
32  
33  
34  
35  
36  
37  
38  
39  
40  
41  
42  
43  
44  
45  
46  
47  
48  
49  
50  
51  
52  
53  
54  
55  
56  
57  
58  
59  
60

# Evaluation of a knowledge translation strategy to improve policy making and practices in health promotion and disease prevention setting in French regions: TC-REG, a realist study

<sup>1,2,3</sup> Judith Martin-Fernandez, <sup>1,2</sup> Olivier Aromatario, <sup>1,2</sup> Ollivier Prigent, <sup>4</sup>Marion Porcherie, <sup>5</sup>Valery Ridde, <sup>1,2,6</sup> Linda Cambon.

<sup>1</sup> INSERM Bordeaux Population Health Research Center, UMR 1219, CIC1401-EC, University of Bordeaux, ISPED, 33000, Bordeaux, France.

<sup>2</sup> University of Bordeaux, ISPED, F-33000 Bordeaux, France

<sup>3</sup> CHU, Bordeaux, France

<sup>4</sup>Arènes-Rennes 1 UMR CNRS 6051, EHESP, Rennes, France

<sup>5</sup>CEPED, Institute for Research on Sustainable Development, IRD-Université de Paris, ERL INSERM SAGESUD, Paris, France.

<sup>6</sup>Chaire de prévention ISPED/SPF, Université de Bordeaux, Bordeaux, France

“Corresponding author:

Judith Martin-Fernandez: [judith.martin-fernandez@u-bordeaux.fr](mailto:judith.martin-fernandez@u-bordeaux.fr)

## Abstract:

**Objective:** This paper presents the results of a realist evaluation of a knowledge translation (KT) intervention implemented in the field of health promotion and disease prevention at the local level in France.

**Design:** Realist evaluation study.

**Setting:** The target population comprised decision makers and field professionals working in prevention and public health services operating in regions of France (i.e., ARS, IREPS, and their partners).

**Participants:** This evaluation was based on data collected from 2 seminars, 82 interviews, 18 observations, and 4 focus groups over 18 months.

**Intervention:** the TC-REG intervention aimed to increase the use of evidence in cancer prevention, health promotion and disease prevention across four geographic regions in France. The intervention combined various activities: Supporting access to and adaptation of usable evidence, Strengthening professionals' skills in analyzing, adopting, and using policy briefs, and Facilitating the use of evidence in organizations and processes.

**Results:** The collected data was used to define favorable/unfavorable contexts for the use of scientific data and mechanisms to be activated to encourage the use of scientific knowledge. From these raw results eight final refined middle-range theories were defined. Organized around the mechanisms to be activated, these middle-range theories illustrate how to activate knowledge and under what conditions. These analyses provided a basis for the production of seven operational and contextualized recommendations to develop KT to inform regional policy-making regarding health promotion and disease prevention.

**Conclusion:** The results obtained from the analyses led us to formulate two perspectives of an operational nature for the benefit of those involved in prevention and health promotion.

## Strengths and limitations of this study'

- The large amount of qualitative data allowed us to create a knowledge translation (KT) taxonomy and to develop eight middle-range theories illustrating how to activate mechanisms and under what conditions.
- This study provided a basis for the production of seven operational and contextualized recommendations to develop KT to inform regional policy-making regarding health promotion and disease prevention.
- The results obtained from the analyses described here led us to formulate two perspectives of an operational nature for the benefit of those involved in prevention and health promotion
- A limitation of this work remains its potential for generalization, as this work has been carried out in a particular field and country, the prevention field in France.

KEYWORDS: Knowledge transfer; Realist evaluation; France; Prevention; Public health, Cancer

## Funding statement

This research has received funding from the IRESP *via* a national competitive peer review grant application process “2016 General Call for projects- Prevention field” (No. CAMBON-17II015-00).

## Competing interests

The authors declare that they have no competing interests.

**Words count:** 6 455

## Introduction

Evidence-based decision-making and practice are major issues in public health. For researchers, this means looking ahead to the dissemination of findings and integrating different types of knowledge and decision-making challenges [1]. It also implies a need for greater collaboration between the research community and decision-makers [2]. Even if decision-makers, stakeholders, and researchers mostly agree that it is necessary to move forward with evidence-informed practices and policy-making, some barriers persist related to people, organizations, contexts, and evidence's attributes [3–5]. Gervais et al. [3,6] suggested that KT research concerning decision-making processes offers multiple explanatory factors, which can be classified in three categories. The first category relates to the specific properties of the evidence itself: nature, availability, accessibility, quality and credibility, intelligibility, ability to meet needs, adaptability, and transferability [6]. The second category relates to the characteristics of decision-makers: beliefs or personal values, political leanings, sociodemographic characteristics, level of education, previous experiences, motivation, and ability to interpret data. These characteristics may influence how new knowledge is addressed during the decision-making process [7]. The third category relates to the characteristics of the organizations and local contexts in which knowledge producers and users perform their work [3]: openness to change; material, human, and financial resources available for KT; social and political context in the external environment; style of management; leadership; staffing; and stakeholder coalitions. Multiple barriers to the adoption of evidence in the field of public health underline the nonlinear process between knowledge production and knowledge use. These barriers prevent optimal production and use of evidence. To address this, it is necessary to assess how knowledge is produced and used; to enhance the understanding of decision-making processes and mechanisms; and to examine the abilities of public health services to integrate research findings into their decisions and operations. This assessment requires a systematic approach

1  
2  
3 that includes the adaptation of scientific knowledge; the abilities of users to capture, understand,  
4 and apply available evidence; and the presence of an organizational and supportive culture for  
5 use of this evidence. These are the major challenges of knowledge translation (KT)[8], defined  
6 as “the group of activities and interaction mechanisms that foster the dissemination, adoption  
7 and appropriation of the most up-to-date knowledge possible for use in professional practice  
8 and in healthcare management” [9].  
9

10 Over the past several decades, a growing body of literature has been published regarding KT  
11 [8,10,11]. Facilitators and barriers related to KT have been studied in several contexts [12–14];  
12 several KT frameworks that provide a mapping of KT processes have been described [15].  
13 Although these frameworks are helpful for understanding the key elements involved in KT,  
14 they lack consistency regarding implementation of KT schemes in local contexts because they  
15 provide broad concepts without concrete examples of KT activities to implement. The literature  
16 highlights the insufficient dissemination of scientific knowledge [16–20]; it also emphasizes  
17 that, to be effective, KT modalities must be contextualized to the environment in which  
18 knowledge dissemination is required. Thus, the effectiveness of KT strategies depends on the  
19 context in which they are implemented [8,21–24]. The contextualization of KT strategies is  
20 therefore necessary to remove barriers to knowledge use.  
21  
22  
23  
24  
25  
26  
27  
28  
29  
30  
31  
32  
33  
34  
35  
36  
37  
38  
39  
40  
41  
42

43 This paper presents the results of a realist evaluation study of KT strategies implemented in the  
44 field of health promotion and disease prevention at the local level in France. By disease  
45 prevention we mean specific, population-based and individual-based interventions for primary  
46 and secondary prevention, aiming to minimize the burden of diseases and associated risk factors  
47 [25].  
48  
49  
50  
51  
52  
53

54 The TC-REG (“Transfert de Connaissances en REGion”) intervention (referred to in this paper  
55 as the intervention) is a knowledge translation plan implemented in 4 French regions consisting  
56 of an accompanying support process for the use of evidence in cancer prevention. The  
57  
58  
59  
60

1  
2  
3 intervention combined various activities: Supporting access to and adaptation of usable  
4 evidence, Strengthening professionals' skills in analyzing in analyzing, adopting, and using  
5 policy briefs, and Facilitating the use of evidence in organizations and processes. The aim of  
6 the TC-REG study was to evaluate the reported impact of this support process to influence the  
7 decisions and preventive practices in four regions of France. This study documented the  
8 mechanisms, processes, the configurations (i.e., Contexts/Mechanisms/Outcomes [CMOs])  
9 [26] and the conditions of reported effectiveness established as a result of this support to ensure  
10 KT.  
11  
12  
13  
14  
15  
16  
17  
18  
19  
20  
21

22 RAMESES II reporting standards for realist evaluations were used [27].  
23  
24  
25

## 26 **Methods/design**

### 27 *Theoretical framework*

28  
29  
30  
31  
32 The realist approach [26] is increasingly used for appraising the interactions among an  
33 intervention, its mechanisms, and its contexts. The overall aim is to achieve a better  
34 understanding of an intervention's success factors and how these may be replicated in other  
35 contexts. In realist evaluation, developed by Pawson and Tilley [26], the effectiveness of the  
36 intervention depends on the underlying mechanisms that contribute within a given context.  
37 Realist evaluation involves identification of CMOs configurations. The aim comprises  
38 understanding how and why an intervention works. A middle-range theory (i.e., a theory aimed  
39 toward describing interactions among outcomes, mechanisms, and contexts and therefore  
40 CMOs configurations) is established to highlight the mutual influences of intervention and  
41 context [28,29]. This approach is linked to the black box paradigm [30] and differs from the  
42 experimental paradigm, which evaluates effectiveness without analysis of the mechanism by  
43 which an intervention is successful, as well as without the influence of context. Realist  
44 evaluation determines whether an intervention worked in a manner consistent with its  
45  
46  
47  
48  
49  
50  
51  
52  
53  
54  
55  
56  
57  
58  
59  
60

1  
2  
3 underpinning theory. The generative causality works via three assumptions [31]: i) an  
4 intervention is not successful in isolate, and is not the source of a given outcome; ii) all  
5 interventions trigger a mechanism or a set of mechanisms that produce an outcome; and iii) all  
6 interventions are delivered within specific contexts.  
7  
8  
9

10  
11  
12 Hence, realist evaluation involves identification of middle-range theories. Hypothesized and  
13 validated by empirical investigations, these CMOs configurations help to understand how an  
14 intervention causes change, considering both context and target group [28,29]. The recurrence  
15 of CMOs is observed in successive case studies [29]. To consider context, realist evaluators  
16 observe successive cases, which Lawson (quoted by Pawson in 2006 [31]) has described as  
17 “demi-regularities of CMOs” (i.e., regular, not necessarily permanent occurrences of an  
18 outcome when an intervention triggers one or more mechanisms in a given context) [29].  
19 Analysis of these recurrences in different contexts allows the isolation of key elements that can  
20 be replicated in a family of contexts. This yields middle-range theories that become increasingly  
21 robust with progression among cases. “These middle-range theories, in certain conditions,  
22 predict possible intervention outcomes in contexts different from the one in which the  
23 intervention was tested” [29,32].  
24  
25  
26  
27  
28  
29  
30  
31  
32  
33  
34  
35  
36  
37  
38  
39  
40

#### 41 *Applied to our case*

42  
43  
44 As the realist principle is suitable for studying non-linear interactions in complex systems, we  
45 adopted this approach [33]. In our study, each region involved in the TC-REG intervention,  
46 with its own context, constituted a case. For each case, the intervention was studied to identify  
47 contributory mechanisms in a given context, along with the variation in outcomes. CMOs  
48 configurations were identified through analyses of successive cases. A cross-case analysis was  
49 performed to highlight recurrent CMOs configurations and thus identify key features for  
50 possible replication.  
51  
52  
53  
54  
55  
56  
57  
58  
59  
60

1  
2  
3 Mechanisms were identified qualitatively, in accordance with the definition of Ridde et al.: “a  
4 mechanism is an element of reasoning and reaction of an agent with regard to an intervention  
5 productive of an outcome in a given context” [34,35], and in accordance with the definition of  
6  
7  
8 Cambon et al.: “What characterizes and punctuates the process of change and hence, the  
9  
10  
11  
12 production of outcomes”[36].  
13

14  
15 In a realist approach, interventional elements contribute to the context. Contextual elements  
16  
17  
18 have been included among all elements collected qualitatively that satisfy the following  
19  
20  
21  
22 definition: elements located in time and space that may affect the intervention and the outcomes  
23  
24  
25 produced. Therefore, this study distinguished between Ci (for contextual factors linked to the  
26  
27  
28 intervention) and Ce (for external contextual factors that are not linked to the intervention).  
29

### 30 ***The TC-REG intervention***

31 The TC-REG intervention aiming to improve the use of scientific knowledge among decision-  
32  
33  
34 makers across four geographic regions in France. It combined various activities: Supporting  
35  
36  
37 access to and adaptation of usable evidence, Strengthening professionals’ skills in analyzing in  
38  
39  
40 analyzing, adopting, and using policy briefs, and Facilitating the use of evidence in  
41  
42  
43 organizations and processes.

44 The intervention was elaborated through a collaborative process creating tailor made  
45  
46  
47 knowledge translation plan implemented differently in four regions It aimed to collectively  
48  
49  
50 become acquainted with and master the concept of KT, and to identify effective strategies  
51  
52  
53 highlighted in the literature and their conditions of transferability. As presented in Figure 1, two  
54  
55  
56 kinds of literature review were carried out simultaneously: a review of the existing literature  
57  
58  
59 with the aim of extracting knowledge on successful KT activities and effective mechanisms in  
60  
61  
62 KT, and the drafting of Policy briefs (PBs) consisting of six summaries of systematic reviews  
63  
64  
65 presenting effective prevention practices concerning nutrition, alcohol, tobacco smoking,  
66  
67  
68 physical activity, emotional and sexual life, and psychosocial skills. We also conducted an  
69  
70



1  
2  
3 exploratory qualitative study (14 non-directive interviews) in the four regions to collect data on  
4 the pre-existing scheme as well as activities related to KT and the potential local barriers. Next,  
5 a seminar allowed us to consensually define the initial middle-range theory (CMO) based on  
6 the existing literature, the results from the exploratory study, the presentation of the PBs and  
7 the project team insights (Cf. box 1). Four different KT plans were designed during this seminar  
8 and implemented in each of the 4 regions over a 12-month period. Each KT plan aims to  
9 improve the use of scientific knowledge. This intervention ended in December 2019.

10  
11  
12  
13  
14  
15  
16  
17  
18  
19  
20 *Figure 1: TC-REG Project Phase 1*

21  
22  
23  
24  
25  
26  
27 In each of the 4 regions the following categories of activities were combined: i) Supporting  
28 access to and adaptation of scientific and usable evidence, especially policy briefs, ii)  
29 Strengthening professionals' skills in analyzing, adopting, and using the policy briefs in the  
30 course of their practices and decision-making processes (e.g., training, journal club, and  
31 tutoring); iii) Facilitating the use of evidence in organizations and processes (e.g., collaborative  
32 workshops, normative processes, and incentives). An illustration of the KT plan for one region  
33 is detailed in annex 1. The detailed activities implemented in regions and corresponding to these  
34 operational objectives have been transcribed into a standardized taxonomy published by Affret  
35 et al. [37].  
36  
37  
38  
39  
40  
41  
42  
43  
44  
45  
46  
47  
48  
49  
50  
51

### 52 ***Initial middle-range theory***

53  
54  
55 Drawing on the literature and experience of professionals locally involved in the intervention,  
56 the initial middle-range theory was established [26,31], then tested in each case (i.e., region)  
57 through collection of qualitative data [29].  
58  
59  
60

### Box 1: The TC-REG Initial middle-range theory

#### *Initial middle-range theory*

“The modalities of an effective knowledge transfer scheme combine levers that:

- promote access to information and an adaptation of it (Ci)\*,
- promote the development of capacities to understand and use them (Ci)\*,
- allow the modification of organizational processes (Ci)\* in order to facilitate their production and their appropriation in practice settings.

These modalities of KT produce an increasing use of scientific knowledge (O)\*\*\* by reinforcing:

- the perception of their usefulness (M)\*\*,
- the motivation to use them (M)\*\*,
- the ability to adapt them to the issues present in practical settings (M)\*\*”.

\*Ci=contextual factors linked to the intervention

\*\*M= Mechanism

\*\*\*O= Outcome

At this point, no external contextual factors (i.e. Ce for external contextual factors that are not linked to the intervention) were identified, because there was no consensus on this topic among participants. This process was described in the published study protocol [38].

#### **Population**

This study was conducted in four regions of France<sup>1</sup> and within different types of organizations and their partners: regional health agencies (ARS<sup>2</sup>), which are responsible for policy-making and prevention policies; and non-profit organizations (IREPS<sup>3</sup>). IREPS develop health promotion and prevention programs; they also provide methodological supports to field professionals for the implementation of prevention interventions in different settings (e.g., workplaces, schools, care settings, recreation and community centers, and rural or urban areas). ARS and IREPS work collaboratively to implement prevention and health policies in local contexts.

<sup>1</sup> Paca, Brittany, Martinique, Normandy

<sup>2</sup> Agence Régionale de Santé: regional health agency

<sup>3</sup> Instance Régionale d'Education et de Promotion de la Santé pour tous: Regional organization for health promotion and education

1  
2  
3 This study focused on stakeholders who agreed to implement the intervention in the 4 regions.  
4

5 The sample of this study is composed of :  
6  
7

- 8 • ARS public health professionals: five agents per region (deputy directors in charge of  
9 prevention, heads of strategy departments, and project managers);
- 10 • IREPS professionals: 10 people per region (directors, project managers, and  
11 communication managers);
- 12 • Members of specialized prevention commissions within the Regional Conferences on  
13 Health and Autonomy and members of the Public Policy Coordination Commission,  
14 both dedicated to prevention in various regions of France (five people) and partners of  
15 IREPS and ARS.  
16  
17  
18  
19  
20  
21  
22  
23

24 These 65 persons will be named TC-REG project manager in this article.  
25

26 For all interviews, professionals were selected according to the following criteria: i)  
27 Participation in TC-REG study ; ii) Agreement to participate in the interviews; iii) Agreement  
28 with this use of the data extracted from the interviews ; iv) Diversity among institutes and  
29 professions (i.e., managerial and non-executive positions).  
30  
31  
32  
33  
34  
35

### 36 ***Data collection***

37 This study alternated between theoretical and empirical stages. Data collection consisted of  
38 qualitative investigations through interviews and observations. The results were discussed and  
39 enriched during a seminar on 18 October 2019 with the TC-REG project manager of the four  
40 regions involved. More details regarding this study are available in the published study protocol  
41 [38].  
42  
43  
44  
45  
46  
47  
48  
49

50  
51 Based on the initial middle-range theory (developed during the seminar in May 2017, cf. box  
52 1) and to collect CMOs related to the realist analysis, three series of interviews and one series  
53 of observations were conducted.  
54  
55  
56  
57  
58  
59  
60

1  
2  
3 The first round of non-directive interviews aimed to collect and specify, with reference to the  
4 initial middle-range theory, the potential mechanisms to be activated and the external contextual  
5 elements (so-called Ce) missing in our initial middle-range theory. Thirty-six face to face  
6 interviews were conducted in October/November 2017. We asked the following question:  
7  
8 “What do you think about the use of data from science and what would you place in this  
9 category?” and “Has your thinking evolved? How? How do you explain these evolutions?”,  
10 which led to the identification of several mechanisms such as the perception of usefulness of  
11 the use of scientific knowledge, the perception of the ability to use them and the motivation to  
12 use them; and several contexts elements related to personal characteristics, organization.  
13  
14  
15  
16  
17  
18  
19  
20  
21  
22  
23

24 In the second round, the interviews were semi-directive and aimed to identify a list of KT  
25 activities (so-called Ci) actually carried out in the regions, thereby determining a taxonomy that  
26 would enable them to be compared among regions. Ten semi-directive face to face interviews  
27 with the TC-REG project managers in the regions and four focus groups were conducted  
28 between February 2018 and August 2018. This round of data collection allowed precise  
29 determination of KT activities carried out in the regions, in accordance with the KT plans  
30 defined in August 2017, as well as collection of Cis.  
31  
32  
33  
34  
35  
36  
37  
38  
39  
40

41 The third round of interviews aimed to test our initial middle-range theory and to confirm Ce-  
42 Ci-M-O configurations, but also to identify new emerging configurations. These configurations  
43 were elaborated from the previous interviews and observations. During this round of interviews,  
44 we asked participants, “Since the beginning of the TC-REG intervention, do you use data from  
45 science? How? How do you explain that?” Then we asked more precise questions aiming to  
46 evaluate the reported impact of the KT plans in terms of using scientific knowledge (the  
47 Outcome=’O’). Initially, we planned to classify the outcomes into three categories of use  
48 (instrumental use; conceptual use; persuasive use [38]), but since it appeared that these  
49  
50  
51  
52  
53  
54  
55  
56  
57  
58  
59  
60

categories were in fact mechanisms leading to the use of scientific knowledge, our sole outcome is the reported use of scientific knowledge.

This third round of interviews aimed to test our initial middle-range theory and identify CMO configurations, i.e., to answer this question: through which mechanism(s) does the increased use of evidence take place and what activities and contextual circumstances can influence it?

In total, thirty-six semi-directive telephone interviews were conducted between April and June 2019.

The observations aimed to identify local contextual elements (Ce) and mechanisms (M) activated by the use of evidence-based data (PBs or other). Eighteen observations were conducted during the TC-REG project (Table 1: Objective, data, and qualitative investigation methods).

Table 1: Objective, data, and qualitative investigation methods

| Round                                                             | Objective                                                               | Sample                                                                                                                                                                                         | Data collected                                                                                                                               |
|-------------------------------------------------------------------|-------------------------------------------------------------------------|------------------------------------------------------------------------------------------------------------------------------------------------------------------------------------------------|----------------------------------------------------------------------------------------------------------------------------------------------|
| <b>1st round of interviews</b><br>October/November 2017           | Specify: mechanisms and contextual elements                             | 36 interviews with TC-REG project managers in these regions:<br>- Brittany: 8<br>- Martinique: 12<br>- Normandy: 9<br>- PACA: 7                                                                | <b>O:</b> The current use of scientific data<br><b>M:</b> 13 Mechanisms<br><b>Ce:</b> 7 Contextual elements related to: People/ Organization |
| <b>Observations</b><br>Throughout TC-REG project                  | Identify local contextual elements and mechanisms                       | 18 Non participating observations:<br>- Brittany ( $n = 1$ )<br>- Martinique ( $n = 2$ )<br>- Normandy ( $n = 12$ )<br>- PACA ( $n = 3$ )                                                      |                                                                                                                                              |
| <b>2<sup>nd</sup> round of interviews</b><br>February/August 2018 | determine taxonomy of KT activities currently carried out among regions | 10 Semi-directive interviews with TC-REG project managers in these regions:<br>- Brittany $n = 2$<br>- Martinique $n = 2$<br>- Normandy $n = 3$<br>- PACA $n = 3$<br>4 focus groups (1/region) | <b>Ci:</b> Determine KT activities carried out among regions according to transfer plan defined in August 2017.                              |

|                                                                                                                                                    |                                                                                                 |                                                                                                                                                                                                                       |                                                                                                              |
|----------------------------------------------------------------------------------------------------------------------------------------------------|-------------------------------------------------------------------------------------------------|-----------------------------------------------------------------------------------------------------------------------------------------------------------------------------------------------------------------------|--------------------------------------------------------------------------------------------------------------|
| <p>1<br/>2<br/>3<br/>4<br/>5<br/>6<br/>7<br/>8<br/>9<br/>10<br/>11<br/>12</p> <p><b>3<sup>rd</sup> round of interviews</b><br/>April/June 2019</p> | <p>Identify the evolution in the use of scientific data and <b>Ci-Ce-M-O</b> configurations</p> | <p>36 Semi-directive interviews with TC-REG project managers in these regions:</p> <ul style="list-style-type: none"> <li>- Brittany: 7</li> <li>- Martinique: 10</li> <li>- Normandy: 10</li> <li>PACA: 9</li> </ul> | <p><b>O:</b> The use of scientific data and its evolution (Pbs or other)</p> <p>Ci-Ce-M-O configurations</p> |
|----------------------------------------------------------------------------------------------------------------------------------------------------|-------------------------------------------------------------------------------------------------|-----------------------------------------------------------------------------------------------------------------------------------------------------------------------------------------------------------------------|--------------------------------------------------------------------------------------------------------------|

### 13 *Data analysis*

14  
15  
16 The data collected were coded and analyzed with the NVivo® software. Because the three  
17 series of interviews and the single set of observations comprised different types of information,  
18 they helped to iteratively establish information regarding the CMO configurations at stake. Data  
19 were analyzed step by step, allowing an inductive-deductive approach. The data were analyzed  
20 by two researchers (LC and OA), then compared and reanalyzed to reach a consensus between  
21 the two.  
22  
23  
24  
25  
26  
27  
28  
29

30 Data were coded to identify different levels of information. A first level of coding and analysis  
31 was used to identify and separate:  
32  
33  
34

- 35 i) favorable/unfavorable contexts element to use scientific data, especially the data in PBs (Ce),  
36  
37 ii) arguments evoked by the panel pro or cons the use of scientific data (foreshadowing the  
38 mechanisms to be activated, M).  
39  
40  
41  
42

43 Then, a second, more detailed level of coding allowed specification of the Ce and M to be  
44 activated in the use of scientific knowledge.  
45  
46  
47

48 More precisely, the first round of interviews led to the identification of 7 external contextual  
49 elements (Ce): The existence of training prior to the use of scientific data; The financial  
50 valuation of KT; A favorable organizational context ; A favorable political context; A technical  
51 and logistical context that makes access to the data easier; Previous experiences with the use of  
52 evidence from science; Work time freed up for the use of scientific data in the professional  
53  
54  
55  
56  
57  
58  
59  
60

1  
2  
3 activity. 13 mechanisms were also identified: 3 linked to personal abilities, 2 regarding personal  
4 motivations and 8 types of perceived usefulness.  
5  
6

7  
8 The content analysis of the second wave of interviews identified a list of activities carried out  
9 in the 4 regions. This list was presented at the 2nd steering committee meeting on 13 February  
10 2019 to establish a consensus regarding the wording of the activities. In this way, 18 distinct  
11 KT actions were identified; these were grouped into 11 strategic categories, thus constituting a  
12 taxonomy. The elaboration of a standardized taxonomy helped us to use the same definition of  
13 the activities. More details have been described in Affret et al [37].  
14  
15

16  
17 Before the analysis of the 3<sup>rd</sup> round of interviews, the mechanisms and activities identified were  
18 grouped by type or theme (mechanisms were regrouped into 8 categories and KT activities in  
19 4 groups).  
20  
21

22  
23 The third round of reviews allowed the researchers to identify the Ce-Ci-MO configurations.  
24 For each mechanism (those identified following the second round of interviews or newly cited)  
25 mentioned by professionals as having evolved, the content analysis focused on the activities  
26 and contextual elements that had enabled its evolution. This round of interviews also served to  
27 identify the evolution of scientific knowledge use in these four regions (O).  
28  
29

30  
31 The analysis was based on 3 nodes of analysis: 1) which mechanisms are activated by the KT  
32 plan, 2) for each mechanism, which activity in the KT plan was influenced (based on the KT  
33 taxonomy evocated before) it, 3) by each activity, which element of the context influenced it  
34 (in the list drawn up after the 1<sup>st</sup> round of interviews or newly cited).  
35  
36

37  
38 This analysis allowed us to determine a list of different Ce-Ci-M-O, by region (the four) or by  
39 type of respondent (policymakers or field professionals). We then carried out a transversal  
40 analysis of the different Ce-Ci-M-O in order to define the configurational recurrences or demi-  
41 regularities (i.e., not perfect regularities but the repetitive Ce-Ci-M-O observed generating a  
42  
43  
44  
45  
46  
47  
48  
49  
50  
51  
52  
53  
54  
55  
56  
57  
58  
59  
60

1  
2  
3 perceptible uniformity [39]) according this rule: activities [Ci] in which the association's  
4 frequency with mechanisms [M] was higher than the average of the associations; contexts [Ce]  
5 in which the association's frequency with mechanisms [M] AND with activities [Ci] was higher  
6 than the average of the associations. This allowed us to produce a shared list of interregional  
7 (most generalizable) Ce-Ci-MOs.  
8  
9  
10  
11  
12  
13  
14

15 The results of the analysis of the series 2 and series 3 interviews were discussed during a  
16 seminar on 18 October 2019, which brought together two people per ARS and IREPS from  
17 each of the four regions. This discussion allowed validation of the final CeCiMO configurations  
18 (middle-range theories) defined by the analysis. Figure 2 illustrates the timeline of the TC-REG  
19 project.  
20  
21  
22  
23  
24  
25  
26

27 *Figure 2: TC-REG project timeline*  
28  
29  
30  
31

### 32 ***Patient and Public Involvement***

33  
34  
35 The TC-REG study does not include any patient or public involvement in terms of setting  
36 research priorities, defining research questions or outcomes, providing input into the study  
37 design, or disseminating the results. The research participants answered interviews.  
38  
39  
40  
41

## 42 **Results**

43  
44  
45 As outlined previously, the analysis followed a 3-node frame:  
46  
47  
48

### 49 ***1. Mechanisms activated by the KT plan***

50  
51  
52 Qualitative evidence allowed the identification of links between components of the middle-  
53 range theories. The following three mechanisms were most frequently reported to be strongly  
54 involved in the use of scientific knowledge among professionals:  
55  
56  
57  
58  
59

- 60 • Perception of strategic utility (i.e., to legitimize practice):



1  
2  
3  
4  
5 “That’s it, we really need scientific data, proven data to support what they are saying to be  
6 taken seriously.”<sup>4</sup>  
7

8  
9 *Albert, Ireps*

- 10  
11  
12  
13  
14 • Perception of instrumental utility (i.e., to change or improve practice):  
15

16  
17 “It gives us reliable elements to be able to adapt, to build our actions, well... I see it like  
18 that”  
19

20  
21 *Véronique, Organization*

- 22  
23  
24 • Ability to master these data (i.e., ability to use data easily and independently):  
25

26  
27 “The data transmitted by TC-REG (the PBs) will be able to evolve as a support for work and  
28 validation of scientific data on the ground and to apply them concretely”  
29

30  
31 *Fannie, ARS*

32  
33 Five other mechanisms were identified but less often reported as important in the use of  
34 scientific data:  
35

- 36  
37  
38 • The ability to understand the scientific data  
39  
40 • The ability to identify and recognize the scientific knowledge  
41  
42 • The motivation to use it  
43  
44 • The perception of the conceptual utility of it (i.e., useful to create new frameworks for  
45 analyzing their practices)  
46  
47 • The perception of the processual utility of this knowledge in terms of partnerships, for  
48 example.  
49

50  
51 **2. Activities of the KT plan influencing the mechanisms**  
52

53  
54 The KT activities were grouped into 4 categories:  
55

56  
57  
58  
59 

---

 <sup>4</sup> These verbatim were first transcribed in French, then translated by two native translators and then checked again  
60 by native French speaker researchers.

- Communication regarding scientific data,
- Adaptation to realities encountered in the field by the professionals,
- Support activities for the use of these data
- Support activities enabling changes in professional practice

### *3. Elements of the context influencing the activities and the mechanisms*

Contexts that had an influence on activities were:

- Political will and organizational contexts facilitating or promoting the use of scientific knowledge
- Previous experience regarding the use of scientific evidence in practice.
- Gain in experience using scientific data
- Knowing where and how to find these data (dissemination channels)
- Previous training in the use of scientific data

#### *Final middle-range theories*

From these raw results eight final refined middle-range theories were defined (see Figure 3: Final MRTs). These theories were framed, conceptualizing the recurrence of the CMO configurations or semi-regularities observed. Organized around the mechanisms to be activated, these middle-range theories illustrate how to activate these mechanisms and under what conditions they will be activated. These theories refine and enrich the initial middle-range theory.

1. Use of scientific knowledge (O) is facilitated if professionals **feel able to understand it (M)**. This perception is facilitated by activities that help to change practices (e.g., training, support, and seminars) (Ci), particularly if the organizational context facilitates these practices (Ce) (e.g. creating trained team dedicated to these activities) and, if there is a political will to encourage it (Ce), and if the professionals gain experience from it (Ce).
2. Use of scientific knowledge (O) is facilitated if professionals **feel able to autonomously become acquainted with or master (M)** it in their practice. This perception is

1  
2  
3 facilitated by activities allowing changes in practices (e.g., training, support, and  
4 seminars) that promote the use of scientific data (Ci), particularly when the organization  
5 facilitates this use (Ce), when there is an institutional policy promoting the transfer of  
6 knowledge (Ce), and when professionals gain experience from it (Ce). This perception  
7 is also increased by communication/dissemination activities based on scientific data  
8 (Ci), when they are adapted to the reality and needs of professionals (Ci). These  
9 activities are more effective if professionals are familiar with the dissemination channels  
10 (Ce).

- 11  
12  
13  
14  
15  
16  
17 3. Use of scientific knowledge (O) is facilitated if professionals **feel able to locate and**  
18 **identify** such knowledge (M). This perception is facilitated by communication activities  
19 regarding these data (Ci), especially if the professionals know where to find these  
20 activities (Ce). It is also facilitated by support activities that can lead to changes in  
21 behavior (e.g., training, support, and seminars) (Ci), especially if the organization  
22 facilitates their use (Ce), if the institution encourages it (Ce), and if the professionals  
23 have some experience in the specific topic (Ce).
- 24  
25  
26  
27  
28  
29 4. Use of scientific knowledge (O) is facilitated if professionals **are motivated to use it**  
30 **(M)**. This motivation can be induced by communication activities (Ci) and support for  
31 changing practices (Ci), especially if the professionals know the dissemination channels  
32 (Ce) and have already attempted to integrate these data into their practice (Ce).
- 33  
34  
35  
36  
37  
38  
39 5. Use of scientific knowledge (O) is facilitated if professionals perceive them as **useful**  
40 **to improve their practice (M)**. This perception is activated by communication  
41 activities (Ci), adaptation of evidence-based data to their reality and needs (Ci), and  
42 activities supporting changes in practices (e.g., training, support, and seminars) (Ci),  
43 particularly if the organization facilitates the use of these data (Ce), the institution  
44 encourages it, and if the professionals have acquired experience in this practice.
- 45  
46  
47  
48  
49  
50  
51  
52  
53  
54  
55  
56  
57  
58  
59  
60 6. Use of scientific knowledge (O) is facilitated if professionals **perceive it useful to**  
**create new frameworks for analyzing their practices (M)**. This perception is  
activated by communication activities regarding these data (Ci) and by an institutional  
structure that promotes their use on a daily basis (e.g., dedicated service, transfer plan,  
and integration into team operations) (Ci). This consideration is more effective if  
professionals have experience in the use of scientific knowledge (Ce), especially if they  
have been trained (Ce), and if the organization and institutional political policy are  
favorable toward KT (Ce).

- 1  
2  
3  
4  
5  
6  
7  
8  
9  
10  
11  
12  
13  
14  
15  
16  
17  
18  
19  
20  
21  
22  
23  
24  
25  
26  
27  
28  
29  
30  
31
7. Use of scientific data (O) is facilitated if professionals perceive them as **useful to legitimize or advocate their professional activity (M)**. This perception is facilitated by communication activities regarding these data (Ci), particularly when there is a political will in favor of KT (Ce) and when professionals are aware of the dissemination channels (Ce). This perception is also promoted by activities supporting changes in practices (e.g., training, support, and seminars) (Ci) that are supported by political will and professionals' experience (Ce); these are added favorable organizational conditions (Ce).
  8. Use of scientific data (O) is facilitated if professionals perceive them as **useful in creating new partnerships (M)**, particularly within the research community. This perception is made possible by activities that support changes in practices (e.g., training, support, and seminars) (Ci), as well as by structured activities that promote this use on a daily basis (e.g., dedicated service, transfer plan, and integration into team operations) (Ci). This perception is more effective when professionals can financially justify the use of scientific data (Ce), when the institutional political will is favorable toward KT (Ce), when organizations facilitate this transfer (Ce), and when the professionals have experience in the use of scientific knowledge (Ce).

32  
33  
34  
35  
36  
37  
38  
39  
40  
41  
42  
43  
44  
45  
46  
47  
48  
49  
50  
51  
52  
53  
54  
55  
56  
57  
58  
59  
60

*Figure 3 : Final MRTs*

Taking up in this way each activity present in these refined middle-range theories it is possible to draw up practical recommendations for the field professionals for the development of KT. We have thus elaborated seven operational and contextualized recommendations to develop KT to inform regional policy-making regarding health promotion and disease prevention.

#### Recommendation 1 - Favorable professional environment for KT

Use of scientific evidence is facilitated if the institution in which professionals work shows a clear political will in this area and if the environment makes it easier to understand and to use making it more practical and more rewarding.

#### Recommendation 2 - Learning experience

1  
2  
3 While the use of scientific evidence in practice requires a significant initial investment (e.g.,  
4 cognitive and temporal), the study shows that more use of scientific data by professionals leads  
5 to more routine implementation. This constitutes a learning experience.  
6  
7  
8  
9

### 10 Recommendation 3 - Short-term utility and independent appropriation

11  
12  
13 The mechanisms most strongly involved in anchoring KT use are linked to the possibility of  
14 direct use of scientific evidence in the activities of professionals. Indeed, professionals are more  
15 inclined to use scientific data when they perceive these data as useful to legitimize, advocate,  
16 or concretely modify their practices, as well as when they feel able to mobilize these data  
17 independently. This perception is accentuated if these data are accessible, in accordance with  
18 their needs (adapted), and if they have been trained in the use of these data.  
19  
20  
21  
22  
23  
24  
25  
26  
27

### 28 Recommendation 4 –Promoting the perception of scientific data usefulness

29  
30  
31 Communication/dissemination of scientific data promotes perception of its usefulness, ability,  
32 and motivation to use scientific data, if the environmental working conditions allow for their  
33 use. Evidence-based dissemination activities are particularly crucial in:  
34  
35  
36  
37

- 38 • Motivation to use scientific evidence, as well as ability to identify and master it.
- 39 • Perception of the instrumental utility of scientific evidence in daily practice.
- 40 • Perception that use of scientific evidence will bring a new way of presenting
- 41 their activity (conceptual utility).
- 42 • Perception that use of scientific evidence will legitimize their activities,
- 43 supported by confidence in its added value (strategic utility).
- 44
- 45
- 46
- 47
- 48
- 49
- 50

### 51 Recommendation 5 – An adapted knowledge

52  
53  
54 Data transformation and adaptation activities have a reported impact on the capability to utilize  
55 the data and the perception that they allow for concrete changes, if the professional environment  
56 is favorable to such changes. Data transformation and adaptation activities for stakeholders,  
57  
58  
59  
60

1  
2  
3 such as inclusion of evidence-based data (via typical communication tools: adaptation and  
4 dissemination of evidence through video vignettes, explicit and oriented guides, scientific  
5 documents, creation of bibliographical selections [evidence-based actions], and  
6 multidisciplinary and multi-professional co-construction of KT tools and processes), most  
7 notably influence:  
8  
9  
10  
11  
12  
13

- 14 • Ability to utilize scientific data in practice.
- 15 • Perception that use of scientific data will enable professionals to change their  
16 practices (instrumental utility).  
17  
18  
19  
20  
21  
22

### 23 Recommendation 6 – Structural activities as facilitator

24  
25 These activities facilitate the use of scientific data influence, the perceived usefulness of  
26 scientific data, particularly in framing practices and mobilizing new partnerships with research  
27 or other organizations. Structural activities to facilitate KT (e.g., institutional communication  
28 regarding a KT program or plan; use of the KT program to develop specific partnerships ;  
29 identification of a style guide for KT activities; development of a support service for KT  
30 development; evaluation of promising practices, modification, reinforcement, or activity  
31 orientation of an existing KT plan; establishment of internal coordination meetings [how to use  
32 evidence] or systematic reminders of the importance [interest and added value] of using  
33 scientific data in team and/or project meetings or in professional or financial documents)  
34 influence:  
35  
36  
37  
38  
39  
40  
41  
42  
43  
44  
45  
46  
47  
48  
49

- 50 • Perception that use of scientific data brings a new way of presenting activities  
51 (conceptual usefulness).  
52
- 53 • Perception that use of scientific data will allow the development of new  
54 partnerships (process utility) with the research community.  
55  
56  
57  
58  
59  
60

1  
2  
3 Recommendation 7 – Activities to support KT influence the understanding and perceptions of  
4 the usefulness of these data  
5  
6  
7

8 When the organizational and political environment within the institution is favorable, activities  
9 supporting KT will influence the capacity to understand and use scientific data and the  
10 perception of the usefulness of these data at multiple levels (i.e., entering into new partnerships,  
11 as well as legitimizing and/or renewing one's practices).  
12  
13  
14  
15  
16

17 Activities to support KT (e.g., specific communication meetings on evidence-based science,  
18 awareness on the use of evidence-based data [meetings or seminars], and training to analyze  
19 and use scientific knowledge; analysis and exchange workshops; methodological support;  
20 existence of a proactive advocate for the deployment of KT [encouragement, mobilization,  
21 reminders, and support regarding the development of KT]; methodological support for  
22 deployment of KT; creation and dissemination of methodological tools based on scientific data  
23 [grids and repositories] to support autonomous use; development of a methodological guide to  
24 assist in the implementation of KT, and to facilitate the use of tools developed based on  
25 evidence [whether from PBs]) influence:  
26  
27  
28  
29  
30  
31  
32  
33  
34  
35  
36  
37  
38

- 39 • Capacity of professionals to understand, become acquainted with, and identify  
40 evidence from science.  
41
- 42 • Their motivation to use evidence from science.  
43
- 44 • Their perception that use of scientific evidence will enable changes in practices  
45 (instrumental utility), legitimize activities, and convince others of its added value  
46 (strategic utility).  
47
- 48 • Their perception that use of scientific evidence will enable development of partnerships  
49 with the research community if this interaction activity is supported and rewarded  
50 financially.  
51  
52  
53  
54  
55  
56  
57

58 These recommendations and facilitators are made possible and catalyzed by professionals'  
59 experiences of evidence-informed practices and by the official (i.e., political, organizational, or  
60

1  
2  
3 institutional) position, which should be explicitly favorable toward and encourage use of such  
4  
5 practices.  
6  
7

## 8 9 **Discussion**

10  
11  
12 The aim of this study was to experiment and characterize the factors associated with the success  
13 of a KT plan in health promotion and disease prevention settings in the local context in France.  
14  
15 Success was defined as the plan's ability to i) enable public health stakeholders to address the  
16 challenges of KT and ii) bring about changes in public health policy and practices (i.e.,  
17 integration of evidence-informed public health and collaborative practices). We sought to  
18 explain the parameters and conditions of these strategies to determine their transferability into  
19 other contexts by expansion of the results obtained in the first seminar into eight more precise  
20 final theories.  
21  
22  
23  
24  
25  
26  
27  
28  
29  
30  
31

32 Notably, by specifying the middle-range theories in the French context, the results were  
33 consistent with numerous studies regarding KT [19,24,40]. Indeed, they confirmed the need to  
34 (i) combine KT strategies [24,40–42], (ii) make actions sustainable [43], (iii) transform  
35 institutions beyond simply raising the awareness of professionals [44], (iv) adapt the evidence  
36 to ensure it could be transferred to each type of audience [41,45–47], and (v) support change  
37 [6]. More specifically, our study underlines the particular weight of three major types of  
38 activities: i) those which help to change practices and promote scientific data use (e.g., training,  
39 support, and seminars), ii) those which adapt scientific data (adapted emails, policy-briefs,  
40 advocacy, etc.), iii) and those providing support for changing practices by an institutional daily  
41 promotion of institutional structure (e.g. existence of a proactive referent for KT roll-out,  
42 development of a methodological guide to help KT implementation, development of  
43 methodological guides to assist in the use of tools developed using evidence, introducing  
44 specific exchange on evidence in current meetings, etc.). Moreover, they confirm four of most  
45  
46  
47  
48  
49  
50  
51  
52  
53  
54  
55  
56  
57  
58  
59  
60



1  
2  
3 influencing contextual parameters to support KT: i) the political will in institution [48], ii) the  
4 professionals' experience in evidence use [49] ; iii) the organizational facilitators promoting  
5 evidence use (linked to person (adopter), specific practices or supports) help) [42,48], and iv)  
6 an immediate benefit in the use of evidence [2].  
7  
8  
9  
10  
11

12  
13 In addition, this study highlighted the key mechanisms to be activated to enable changes in  
14 practice in the KT strategies. They can be grouped into three dimensions: i) capacities: finding,  
15 understanding, and appropriating evidence; ii) attitudes: motivation and feeling that evidence  
16 is useful; and iii) the perception of a direct interest in the use of evidence: changing practices,  
17 legitimizing the activity, advocacy, and formation of new partnerships. With reference to the  
18 interventional system concept [36], which emphasizes that mechanisms are the key functions  
19 of interventions, the results of these interventions must be transferable into other contexts. Our  
20 results confirm that the success of KT results from “combinations of knowledge, relationship,  
21 and organizational characteristics contribute to KT success” which are “dependent on the type  
22 of ecosystem partnership involved”[50].  
23  
24  
25  
26  
27  
28  
29  
30  
31  
32  
33  
34  
35  
36

### 37 ***Strengths and limitations:***

38  
39  
40 Our study highlighted some crucial information from the analyses. The large amount of  
41 qualitative data allowed us to create a taxonomy [37] and to develop eight refined middle-range  
42 theories and seven recommendations that will be valuable for knowledge and decision-making  
43 challenges.  
44  
45  
46  
47  
48  
49

50 Due to the specificity of our study we made several adjustments to the initial protocol. Two  
51 rounds of interviews were initially planned. During the first seminar on May 2017, we were  
52 only able to develop a very generalist initial middle-range theory. Indeed, neither the  
53 exploratory survey nor the experience of the professionals mobilized in the seminar allowed us  
54 to define a more detailed level of KT activity, mechanisms, or external contextual elements of  
55  
56  
57  
58  
59  
60

1  
2  
3 influence, which could be used to develop several theories. Furthermore, we did not find any  
4 taxonomy in the literature sufficiently operative to structure regional action plans. Because of  
5 these observations, we reviewed our investigation strategy in three rounds of interviews, rather  
6 than two. We developed a taxonomy of KT activities that allowed comparison of identical  
7 activities among regions [37]. These developments strongly mobilized the research team, thus  
8 mobilizing the project's resources. Thus, the last seminar could not be carried out.  
9

10  
11  
12 The limit of this work remains its potential for generalization. The work has been carried out in  
13 a particular field and country, the prevention field in France. It would be interesting to check  
14 whether these middle range theories are verified in other fields and other countries where the  
15 KT development might be more advanced. These investigations could lead us to refine our  
16 middle range theories or open to other configurations. Indeed, we can hypothesize that other  
17 difficulties would have to be overcome and therefore other mechanisms to be activated.  
18

19  
20  
21 Moreover, the follow-up was carried out over 18 months. No doubt that some activities will  
22 eventually prove to be not very effective and others will surprise by their effectiveness because  
23 they have a longer latency. In fact, both professional practices and their impact take a long time  
24 to modify. Moreover this impact could be difficult to observe due to the complexity of what is  
25 at stake. There is therefore a real interest in verifying the stability of these middle range theories  
26 over time.  
27

28  
29  
30 Finally, we have not analyzed the potential synergy between Ci and Ce either, even if the  
31 observations show some leads. For example, we can observe that some external contextual  
32 elements (Ce) such as "pre-trained professionals" echo activities (Ci) "training of professionals  
33 in CT".  
34  
35  
36  
37  
38  
39  
40  
41  
42  
43  
44  
45  
46  
47  
48  
49  
50  
51  
52  
53  
54  
55  
56  
57  
58  
59  
60

1  
2  
3 Notwithstanding these limits, the work carried out nevertheless offers concrete paths for the  
4 development of KT by having allowed the groups of activities to specify the conditions for their  
5 success and opens the way for further development in terms of research.  
6  
7  
8  
9

### 10 ***Conclusion and perspectives***

11  
12  
13  
14 This study used a realist methodology to reveal the factors associated with the success of a KT  
15 plan, and elucidated the mechanisms by which such strategy can bring change in public health  
16 policy and practices. We sought to explain the parameters and conditions of these strategies to  
17 determine their potential transferability into other contexts through three types of mechanisms  
18 to be activated: i) the capacities (finding, understanding, and appropriating evidence) of field  
19 professionals; ii) the attitudes, (motivation and feeling that evidence is useful); and iii) the  
20 perception of a direct interest in the use of evidence (changing practices, legitimizing the  
21 activity, advocacy, and formation of new partnerships). We suggest they are the key functions  
22 of KT in prevention, which could be activated if a combination of activities and organizational  
23 characteristics are gathered.  
24  
25  
26  
27  
28  
29  
30  
31  
32  
33  
34  
35  
36  
37

### 38 **Compliance with Ethical Standards and ethics approval**

39  
40  
41  
42 All procedures performed in studies involving human participants were in accordance with the  
43 ethical standards of the institutional and/or national research committee, it follows the relevant  
44 French legislation of the research category on interventional research protocol involving the  
45 human person. An informed consent was obtained from all individual participants included in  
46 the study.  
47  
48  
49

50  
51 This study has received approval from the national agency for data protection *Commission*  
52 *Nationale Informatique et Libertés* (NS no. 43, registered under number 2028640 v 0).  
53  
54  
55

56 The English in this document has been checked by at least two professional editors, both native  
57 speakers of English  
58  
59  
60

1  
2  
3  
4  
5  
6  
7  
8  
9  
10  
11  
12  
13  
14  
15  
16  
17  
18  
19  
20  
21  
22  
23  
24  
25  
26  
27  
28  
29  
30  
31  
32  
33  
34  
35  
36  
37  
38  
39  
40  
41  
42  
43  
44  
45  
46  
47  
48  
49  
50  
51  
52  
53  
54  
55  
56  
57  
58  
59  
60

For peer review only

## References:

- 1 Alla F, Cambon L. Recherche interventionnelle en santé publique, transfert de connaissances et collaboration entre acteurs, décideurs et chercheurs. *Quest Santé Publique*. 2014;:1–4.
- 2 Langer L, Tripney J, Gough D. The science of using science: researching the use of research evidence in decision-making. London: : EPPI-Centre, Social Science Research Unit, UCL Institute of Education, University College London 2016.
- 3 Gervais M-J, Gagnon F, Bergeron P. Les conditions de mise à profit des connaissances par les acteurs de santé publique lors de la formulation des politiques publiques : L'apport de la littérature sur le transfert des connaissances. Montréal : Chaire d'Etude CJM-IU-UQAM. 2013.
- 4 Orton L, Lloyd-Williams F, Taylor-Robinson D, *et al*. The Use of Research Evidence in Public Health Decision Making Processes: Systematic Review. *PLoS One* 2011;6. doi:10.1371/journal.pone.0021704
- 5 Grimshaw JM, Eccles MP, Lavis JN, *et al*. Knowledge translation of research findings. *Implement Sci* 2012;7:50. doi:10.1186/1748-5908-7-50
- 6 Gervais MJ, Chagnon F. *Modélisation des déterminants et des retombées de l'application des connaissances issues de la recherche psychosociale*. Québec: : Fonds québécois de recherche sur la société et la culture 2010.
- 7 Jabot F. L'évaluation des politiques publiques : cadres conceptuel et étude de son utilisation par les décideurs des institutions régionales de santé en France [Internet]. Université de Lorraine; 2014 [cited 2017 Feb 14]. Available from: <http://www.theses.fr/2014LORR0201>. <http://www.theses.fr/2014LORR0201>
- 8 Dagenais C, Ridde V, Laurendeau M-C, *et al*. Knowledge translation research in population health: establishing a collaborative research agenda. *Health Res Policy Syst* 2009;7:28. doi:10.1186/1478-4505-7-28
- 9 Castiglione S, Ritchie J. Passer à l'action : nous connaissons les pratiques que nous souhaitons changer. Que faire, maintenant? Guide de mise en oeuvre pour les professionnels de la santé [Internet]. Instituts de Recherche en Santé du Canada; 2012 [cited 2017 Feb 28]. Available from: <http://www.cihr-irsc.gc.ca/f/45669.html>. <http://www.cihr-irsc.gc.ca/f/45669.html>
- 10 Fafard P, J Hoffman S. Rethinking knowledge translation for public health policy. *Evidence & Policy: A Journal of Research, Debate and Practice* Published Online First: 1 January 2018. doi:10.1332/174426418X15212871808802
- 11 Bornbaum CC, Kornas K, Peirson L, *et al*. Exploring the function and effectiveness of knowledge brokers as facilitators of knowledge translation in health-related settings: a systematic review and thematic analysis. *Implement Sci* 2015;10:162. doi:10.1186/s13012-015-0351-9
- 12 El-Jardali F, Lavis J, Moat K, *et al*. Capturing lessons learned from evidence-to-policy initiatives through structured reflection. *Health Research Policy and Systems* 2014;12:2. doi:10.1186/1478-4505-12-2
- 13 Siron S, Dagenais C, Ridde V. What research tells us about knowledge transfer strategies to improve public health in low-income countries: a scoping review. *Int J Public Health* 2015;60:849–63. doi:10.1007/s00038-015-0716-5

- 1  
2  
3 14 Dobbins M, Greco L, Yost J, *et al.* A description of a tailored knowledge translation intervention delivered  
4 by knowledge brokers within public health departments in Canada. *Health Research Policy and Systems*  
5 2019;**17**:63. doi:10.1186/s12961-019-0460-z  
6  
7  
8 15 Milat AJ, Li B. Narrative review of frameworks for translating research evidence into policy and practice.  
9 *Public Health Res Pract* 2017;**27**. doi:10.17061/phrp2711704  
10  
11 16 Green LW, Ottoson JM, García C, *et al.* Diffusion Theory and Knowledge Dissemination, Utilization, and  
12 Integration in Public Health. *Annual Review of Public Health* 2009;**30**:151–74.  
13 doi:10.1146/annurev.publhealth.031308.100049  
14  
15 17 Balas EA, Boren SA. Managing clinical knowledge for health care improvement. *Yearbook of medical*  
16 *informatics* 2000;**9**:65–70.  
17  
18 18 Tabak RG, Reis RS, Wilson P, *et al.* Dissemination of Health-Related Research among Scientists in Three  
19 Countries: Access to Resources and Current Practices. *BioMed Research International*.  
20 2015;**2015**:e179156. doi:https://doi.org/10.1155/2015/179156  
21  
22  
23 19 Brownson RC, Jacobs JA, Tabak RG, *et al.* Designing for Dissemination Among Public Health  
24 Researchers: Findings From a National Survey in the United States. *Am J Public Health* 2013;**103**:1693–9.  
25 doi:10.2105/AJPH.2012.301165  
26  
27 20 Brownson RC, Eyler AA, Harris JK, *et al.* Getting the Word Out: New Approaches for Disseminating  
28 Public Health Science. *Journal of Public Health Management and Practice* 2018;**24**:102–11.  
29 doi:10.1097/PHH.0000000000000673  
30  
31  
32 21 Landry R, Amara N, Lamari M. Utilization of social science research knowledge in Canada. *Res Policy*  
33 2001;**30**. doi:10.1016/S0048-7333(00)00081-0  
34  
35 22 Grol R. Successes and failures in the implementation of evidence-based guidelines for clinical practice.  
36 *Med Care* 2001;**39**. doi:10.1097/00005650-200108002-00003  
37  
38 23 Grol R, Grimshaw J. From best evidence to best practice: effective implementation of change in patients'  
39 care. *Lancet* 2003;**362**. doi:10.1016/S0140-6736(03)14546-1  
40  
41  
42 24 LaRocca R, Yost J, Dobbins M, *et al.* The effectiveness of knowledge translation strategies used in public  
43 health: a systematic review. *BMC Public Health* 2012;**12**. doi:10.1186/1471-2458-12-751  
44  
45 25 WHO EMRO | Health promotion and disease prevention through population-based interventions, including  
46 action to address social determinants and health inequity | Public health functions | À propos de l'OMS.  
47 <http://www.emro.who.int/fr/about-who/public-health-functions/health-promotion-disease-prevention.html>  
48 (accessed 20 May 2021).  
49  
50  
51 26 Pawson R, Tilley N. *Realistic Evaluation*. SAGE Publications 1997.  
52  
53 27 Wong G, Westhorp G, Manzano A, *et al.* RAMESES II reporting standards for realist evaluations. *BMC*  
54 *Medicine* 2016;**14**:96. doi:10.1186/s12916-016-0643-1  
55  
56 28 Pawson R, Greenhalgh T, Harvey G, *et al.* Realist review--a new method of systematic review designed for  
57 complex policy interventions. *J Health Serv Res Policy* 2005;**10 Suppl 1**:21–34.  
58 doi:10.1258/1355819054308530  
59  
60

- 1  
2  
3 29 Blaise P, Marchal B, Lefèvre P, *et al.* Au-delà des méthodes expérimentales: l'approche réaliste en  
4 évaluation. Published Online First: 2010.<http://dSPACE.itg.be/handle/10390/6932>  
5
- 6 30 Salter KL, Kothari A. Using realist evaluation to open the black box of knowledge translation: a state-of-  
7 the-art review. *Implement Sci* 2014;**9**:115. doi:10.1186/s13012-014-0115-y  
8
- 9 31 Pawson R. *Evidence Based Policy: A Realist Perspective*. SAGE Publications Ltd. 2006.  
10
- 11 32 Using implementation science theories and frameworks in global health | BMJ Global Health.  
12 <https://gh.bmj.com/content/5/4/e002269> (accessed 21 Sep 2020).  
13  
14
- 15 33 Robert E, Ridde V. *Dealing With Complexity and Heterogeneity in a Collaborative Realist Multiple Case*  
16 *Study in Low- and Middle-Income Countries*. 1 Oliver's Yard, 55 City Road, London EC1Y 1SP United  
17 Kingdom: : SAGE Publications Ltd 2020. doi:10.4135/9781529732306  
18
- 19 34 Ridde V, Robert E, Guichard A, *et al.* L'approche réaliste à l'épreuve du réel de l'évaluation des  
20 programmes. *The Canadian Journal of Program Evaluation* 2011;**26**:37.  
21  
22
- 23 35 Lacouture A, Breton E, Guichard A, *et al.* The concept of mechanism from a realist approach: a scoping  
24 review to facilitate its operationalization in public health program evaluation. *Implement Sci* 2015;**10**:153.  
25 doi:10.1186/s13012-015-0345-7  
26
- 27 36 Cambon L, Terral P, Alla F. From intervention to interventional system: towards greater theorization in  
28 population health intervention research. *BMC Public Health* 2019;**19**:339. doi:10.1186/s12889-019-6663-  
29 y  
30
- 31 37 Affret A, Prigent O, Porcherie M, *et al.* Development of a knowledge translation taxonomy in the field of  
32 health prevention: a participative study between researchers, decision-makers and field professionals.  
33 *Health Res Policy Syst* 2020;**18**. doi:10.1186/s12961-020-00602-z  
34  
35
- 36 38 Cambon L, Petit A, Ridde V, *et al.* Evaluation of a knowledge transfer scheme to improve policy making  
37 and practices in health promotion and disease prevention setting in French regions: a realist study protocol.  
38 *Implementation Science* 2017;**12**:83. doi:10.1186/s13012-017-0612-x  
39
- 40 39 Vaessen J, Leeuw FL. *Mind the Gap: Perspectives on Policy Evaluation and the Social Sciences*.  
41 Transaction Publishers 2011.  
42  
43
- 44 40 Services TF on CP. *The Guide to Community Preventive Services: What Works to Promote Health?* Oxford  
45 University Press 2005.  
46
- 47 41 Armstrong R, Waters E, Crockett B, *et al.* The nature of evidence resources and knowledge translation for  
48 health promotion practitioners. *Health Promot Int* 2007;**22**:254–60. doi:10.1093/heapro/dam017  
49
- 50 42 Barwick MA, Peters J, Boydell K. Getting to uptake: Do communities of practice support the  
51 implementation of evidence-based practice? *J Can Acad Child Adolesc Psychiatry* 2009;**18**.  
52  
53
- 54 43 Tricco AC, Ashoor HM, Cardoso R, *et al.* Sustainability of knowledge translation interventions in  
55 healthcare decision-making: a scoping review. *Implementation Science* 2016;**11**:55. doi:10.1186/s13012-  
56 016-0421-7  
57  
58  
59  
60



- 1  
2  
3 44 Tseng DS. Organisational changes are more effective than education and reminders for raising adult  
4 immunisation and cancer screening rates. *Evidence-based Healthcare* 2002;**6**:186–7.  
5 doi:10.1054/ebhc.2002.0555  
6  
7  
8 45 Hawkins RP, Kreuter M, Resnicow K, *et al.* Understanding tailoring in communicating about health. *Health*  
9 *Educ Res* 2008;**23**:454–66. doi:10.1093/her/cyn004  
10  
11 46 Kreuter MW, Wray RJ. Tailored and targeted health communication: strategies for enhancing information  
12 relevance. *American journal of health behavior* 2003;**27**:S227–32.  
13  
14 47 Dobbins M, Hanna SE, Ciliska D, *et al.* A randomized controlled trial evaluating the impact of knowledge  
15 translation and exchange strategies. *Implementation Science* 2009;**4**:61. doi:10.1186/1748-5908-4-61  
16  
17 48 El-Jardali F, Lavis JN, Ataya N, *et al.* Use of health systems and policy research evidence in the health  
18 policymaking in eastern Mediterranean countries: views and practices of researchers. *Implement Sci*  
19 2012;**7**:2. doi:10.1186/1748-5908-7-2  
20  
21  
22 49 Squires JE, Estabrooks CA, Gustavsson P, *et al.* Individual determinants of research utilization by nurses:  
23 a systematic review update. *Implement Sci* 2011;**6**:1. doi:10.1186/1748-5908-6-1  
24  
25 50 Bacon E, Williams MD, Davies GH. Recipes for success: Conditions for knowledge transfer across open  
26 innovation ecosystems. *International Journal of Information Management* 2019;**49**:377–87.  
27 doi:10.1016/j.ijinfomgt.2019.07.012  
28  
29  
30  
31  
32  
33  
34  
35  
36  
37  
38  
39  
40  
41  
42  
43  
44  
45  
46  
47  
48  
49  
50  
51  
52  
53  
54  
55  
56  
57  
58  
59  
60



1  
2  
3  
4  
5  
6 **Data statement**  
7  
8  
9

10 No additional data available  
11  
12

13 **Authors' contribution**  
14  
15  
16

17 LC supervised the study. JMF, OA and LC drafted this article and all authors ( JMF, OA, OP, MP, VR, LC) revised the manuscript.  
18  
19 The project design was developed by LC and OA. OP, OA collected the data. OA and LC analyzed the data under the supervision of  
20  
21 LC. JMF contributed to part of this analysis. All authors ( JMF, OA, OP, MP, VR, LC) read and approved the final manuscript.  
22  
23

24 **Acknowledgements**  
25  
26  
27

28 The authors are very grateful to all those who took part in the project, especially the professionals from the Bretagne, Martinique,  
29  
30 PACA, Normandie ARS and IREPS, and the Federation nationale d'éducation pour la santé (FNES) for this partnership as well as  
31  
32 Aurelie Affret who contributed to a part of the data collection.  
33  
34  
35  
36  
37  
38  
39  
40  
41  
42  
43  
44  
45  
46  
47  
48  
49  
50  
51  
52  
53  
54  
55  
56  
57  
58  
59  
60

1  
2  
3  
4  
5  
6 **List of abbreviations**  
7  
8  
9

10 ANSP: National Public Health Agency  
11  
12

13 ARS: regional health agency  
14  
15

16 Ce: Contextual factor not linked to the intervention  
17  
18

19 Ci: Contextual factor linked to the intervention  
20  
21

22 CMO: Context – Mechanism – Outcomes  
23  
24

25 INCa: National Cancer Institute  
26  
27

28 IREPS: Regional Authority for Education and Health Promotion  
29  
30

31 TC-REG: Knowledge transfer in regions  
32  
33  
34  
35  
36  
37  
38  
39  
40  
41  
42  
43  
44  
45  
46  
47  
48  
49  
50  
51  
52  
53  
54  
55  
56  
57  
58  
59  
60

1  
2  
3  
4  
5  
6  
7  
8  
9  
10  
11  
12  
13  
14  
15  
16  
17  
18  
19  
20  
21  
22  
23  
24  
25  
26  
27  
28  
29  
30  
31  
32  
33  
34  
35  
36  
37  
38  
39  
40  
41  
42  
43  
44  
45  
46  
47  
48  
49  
50  
51  
52  
53  
54  
55  
56  
57  
58  
59  
60

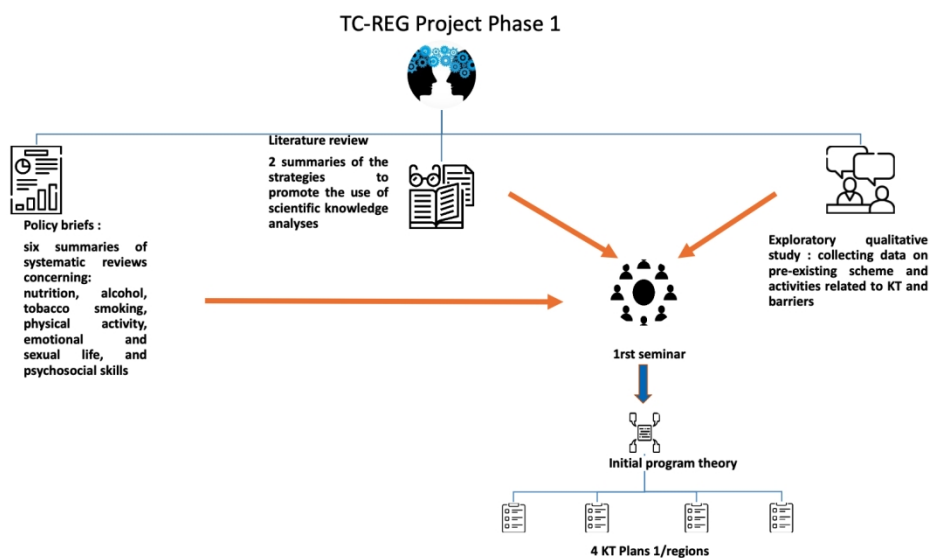

TC-REG Project Phase 1

1  
2  
3  
4  
5  
6  
7  
8  
9  
10  
11  
12  
13  
14  
15  
16  
17  
18  
19  
20  
21  
22  
23  
24  
25  
26  
27  
28  
29  
30  
31  
32  
33  
34  
35  
36  
37  
38  
39  
40  
41  
42  
43  
44  
45  
46  
47  
48  
49  
50  
51  
52  
53  
54  
55  
56  
57  
58  
59  
60

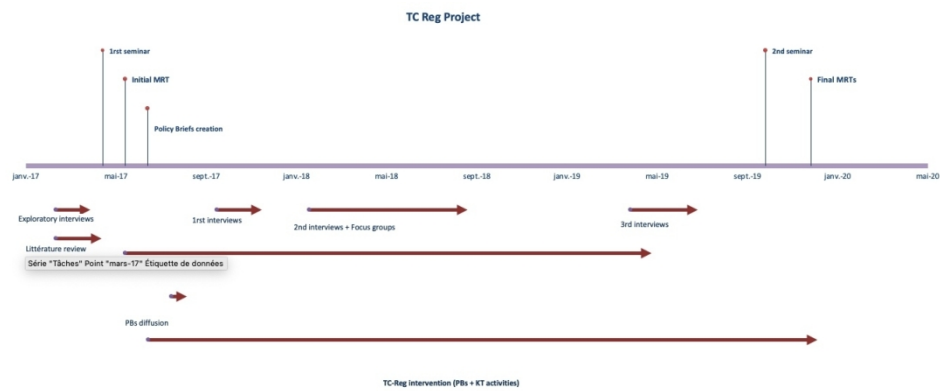

TC-REG project timeline  
 504x208mm (72 x 72 DPI)

1  
2  
3  
4  
5  
6  
7  
8  
9  
10  
11  
12  
13  
14  
15  
16  
17  
18  
19  
20  
21  
22  
23  
24  
25  
26  
27  
28  
29  
30  
31  
32  
33  
34  
35  
36  
37  
38  
39  
40  
41  
42  
43  
44  
45  
46  
47  
48  
49  
50  
51  
52  
53  
54  
55  
56  
57  
58  
59  
60

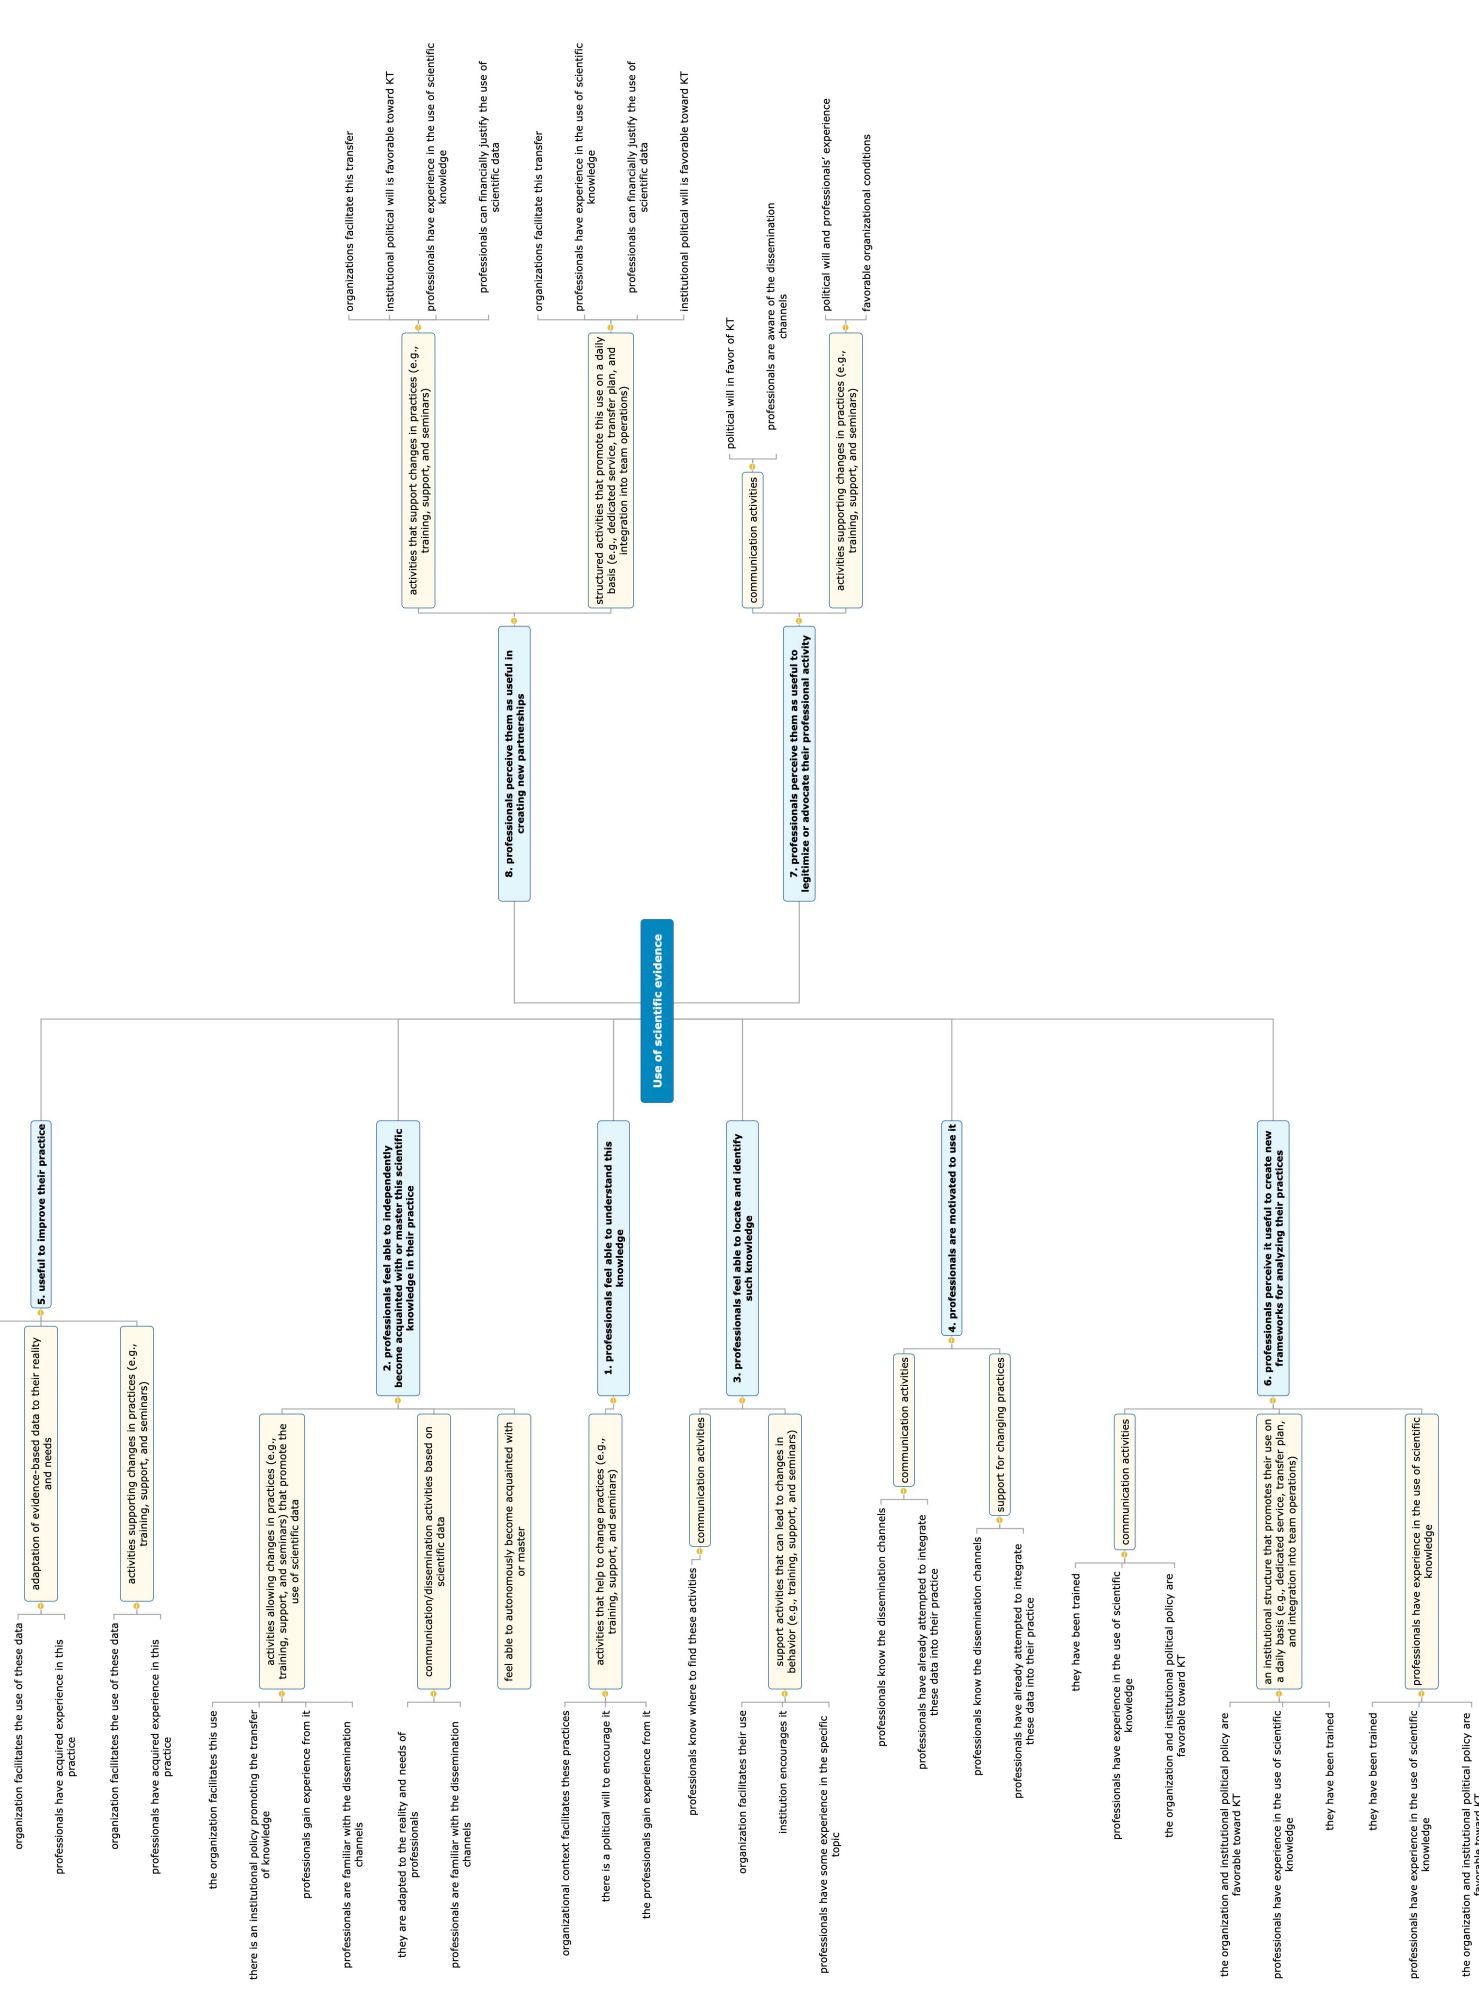

**Annex 1:** Illustration of the KT plan for one region

An illustration of the contextualised knowledge translation (KT) scheme to be implemented in a region: KT activities to be implemented and expected outcomes according to several publics of professionals regionally involved in prevention and health promotion (IREPS professionals, ARS professionals, stakeholders, CRSA professionals).

| <b>Activities to implement with IREPS professionals and expected outcomes</b>                                                                                                |                          |
|------------------------------------------------------------------------------------------------------------------------------------------------------------------------------|--------------------------|
| <i>Activities</i>                                                                                                                                                            | <i>Expected Outcomes</i> |
| Deliberative working group in order to develop a policy-brief for CRSA professionals and committee presidents                                                                | 1, 5                     |
| Deliberative working group in order to develop a policy-brief for field professionals working in prevention and health promotion                                             | 1, 5                     |
| Training in the use of PBS and other evidence data use- Level 2 – (NB: Level 1 being for basic knowledge) for field professionals working in prevention and health promotion | 1, 2, 3, 4, 5            |
| Diffusion of communication tools (newsletters, inserts, etc.) highlighting research results                                                                                  | 1, 2, 3, 4, 5            |
| Reflexive working groups/journal clubs about policy-briefs conception and appropriation: critical analysis, analysis of transferability and practical examples               | 1, 3, 4, 5               |
| Organisation of a regular meeting between stakeholders and researchers, to discuss about research production and field needs, in order to be aware of issues of both parts   | 3, 4, 5                  |

| <b>Activities to implement with ARS professionals and expected outcomes</b>                                                                                                |                          |
|----------------------------------------------------------------------------------------------------------------------------------------------------------------------------|--------------------------|
| <i>Activities</i>                                                                                                                                                          | <i>Expected Outcomes</i> |
| Formation for PBS and other evidence data use- Level 2 – (NB: Level 1 being for basic knowledge)                                                                           | 1, 2, 3                  |
| Reflexive working groups/journal clubs about policy-briefs conception and appropriation: critical analysis, analysis of transferability and practical examples             | 1, 2, 3                  |
| Organisation of a regular meeting between stakeholders and researchers, to discuss about research production and field needs, in order to be aware of issues of both parts | 1, 2                     |
| Diffusion of policy-briefs in the ARS                                                                                                                                      | 1, 2, 3, 4               |
| Redaction by the IREPS of notes based on PBS data and/or other evidence data or theoretical models in the call for proposals and conventions: political memo               | 2, 3, 4                  |
| To make official the collaboration between the ARS and the university research group “human health” (convention, charter, ...)                                             | 2, 3, 4                  |
| Diffusion of communication tools (newsletters, inserts, etc.) that highlight research results                                                                              | 4                        |
| Presentation of the process in the ARS: meetings with the director general, the executive committee, the management committee, etc.                                        | 4                        |
| Political memo for the director general                                                                                                                                    | 4                        |

**Expected outcomes:**

- 1: Field professionals working in prevention and health promotion highlight PBS data use in their productions (presentations, reports, schemes, etc.)
- 2: Field professionals working in prevention and health promotion state evidence use (including PBS data use) in the conventions they have with funders and collaborators.
- 3: Field professionals working in prevention and health promotion use PBS data when developing their field projects.
- 4: Field professionals working in prevention and health promotion use PBS data when writing the action reports they send to funders.
- 5: IREPS teams adopt a shared culture on evidence use.

**Expected outcomes :**

- 1: ARS professionals enhance PBS data in the documents, tools, etc. they produce (e.g. presentations, actions assessment, activities scheme, etc.)
- 2: Evidence (including PBS) requirement appears in the regional calls for projects
- 3: ARS professionals indicate evidence (including PBS) requirement in the conventional agreement they have with stakeholders
- 4: ARS teams adopt a shared culture on evidence use.

| <b>Activities to implement with stakeholders and expected outcomes</b>                                                                                                 |                          |
|------------------------------------------------------------------------------------------------------------------------------------------------------------------------|--------------------------|
| <i>Activities</i>                                                                                                                                                      | <i>Expected Outcomes</i> |
| Formation for stakeholders on evidence use and its adding value (Level 1)                                                                                              | 1, 2, 3                  |
| Formation for stakeholders on evidence use in relation with identified needs previously collected (for example according to a given population, theme, etc.) (Level 2) | 1, 2, 3                  |
| Methodological support for evidence use                                                                                                                                | 1, 2                     |
| Diffusion of communication tools (newsletters, inserts, etc.) that highlight research results and PBS                                                                  | 1, 2                     |
| Deliberative working group in order to develop a policy-brief for field professionals working in prevention and health promotion                                       | 1, 2, 3                  |
| Reflexive working groups/journal clubs about policy-briefs conception and appropriation: critical analysis, analysis of transferability and practical examples         | 1, 2, 3                  |

| <b>Activities to implement with CRSA professionals and expected outcomes</b>                                          |                          |
|-----------------------------------------------------------------------------------------------------------------------|--------------------------|
| <i>Activities</i>                                                                                                     | <i>Expected Outcomes</i> |
| Installation of awareness areas for evidence use among board, committee's presidents and prevention committee members | 1, 2                     |
| Diffusion of policy briefs whose topics are in relation with the agenda of the prevention committee of the CRSA       | 1, 2                     |
| Diffusion of policy briefs whose topics are in relation with the agenda prevention of the CRSA plenary meetings       | 1, 2                     |

**Expected outcomes :**

- 1: CRSA members adopt a shared culture on evidence use.
- 2: CRSA members include PBS data in the notices they deliver

**Expected outcomes :**

- 1: Stakeholders use PBS data when applying to calls for projects as well as in the actions funded on pluri-annual conventions they develop
- 2: Stakeholders use PBS data when developing their projects
- 3: Proximity advisors are able to help stakeholders with evidence use

KT: Knowledge transfer; IREPS: Instance Régionale d'Éducation et de Promotion de la Santé, Regional Authority of education and health promotion; ARS: Agence Régionale de santé, Regional health agency; CRSA: Conférence Régionale de la Santé et de l'autonomie - an advisory organism involved in regional health politics set up; PBS: Stratégies d'Intervention en Prévention, knowledge documents named "intervention strategies in prevention".
