# Supplementary material for: Evaluation of a knowledge translation strategy to improve policymaking and practices in health promotion and disease prevention setting in French regions: TC-REG, a realist study
Source: PubMed Central journal article supplement — BMJ Open. 2021 Sep 30;11(9):e045936. doi: 10.1136/bmjopen-2020-045936 (PMC8487168; doi:10.1136/bmjopen-2020-045936), 2021-09-30
Supplement: bmjopen-2020-045936supp001.pdf [file bmjopen-2020-045936supp001.pdf]

**Annex 1:** Illustration of the KT plan for one region

An illustration of the contextualised knowledge translation (KT) scheme to be implemented in a region: KT activities to be implemented and expected outcomes according to several publics of professionals regionally involved in prevention and health promotion (IREPS professionals, ARS professionals, stakeholders, CRSA professionals).

| Activities to implement with IREPS professionals and expected outcomes                                                                                                       |                          |
|------------------------------------------------------------------------------------------------------------------------------------------------------------------------------|--------------------------|
| <i>Activities</i>                                                                                                                                                            | <i>Expected Outcomes</i> |
| Deliberative working group in order to develop a policy-brief for CRSA professionals and committee presidents                                                                | 1, 5                     |
| Deliberative working group in order to develop a policy-brief for field professionals working in prevention and health promotion                                             | 1, 5                     |
| Training in the use of PBS and other evidence data use- Level 2 – (NB: Level 1 being for basic knowledge) for field professionals working in prevention and health promotion | 1, 2, 3, 4, 5            |
| Diffusion of communication tools (newsletters, inserts, etc.) highlighting research results                                                                                  | 1, 2, 3, 4, 5            |
| Reflexive working groups/journal clubs about policy-briefs conception and appropriation: critical analysis, analysis of transferability and practical examples               | 1, 3, 4, 5               |
| Organisation of a regular meeting between stakeholders and researchers, to discuss about research production and field needs, in order to be aware of issues of both parts   | 3, 4, 5                  |

**Expected outcomes:**

- 1: Field professionals working in prevention and health promotion highlight PBS data use in their productions (presentations, reports, schemes, etc.)
- 2: Field professionals working in prevention and health promotion state evidence use (including PBS data use) in the conventions they have with funders and collaborators.
- 3: Field professionals working in prevention and health promotion use PBS data when developing their field projects.
- 4: Field professionals working in prevention and health promotion use PBS data when writing the action reports they send to funders.
- 5: IREPS teams adopt a shared culture on evidence use.

| Activities to implement with ARS professionals and expected outcomes                                                                                                       |                          |
|----------------------------------------------------------------------------------------------------------------------------------------------------------------------------|--------------------------|
| <i>Activities</i>                                                                                                                                                          | <i>Expected Outcomes</i> |
| Formation for PBS and other evidence data use- Level 2 – (NB: Level 1 being for basic knowledge)                                                                           | 1, 2, 3                  |
| Reflexive working groups/journal clubs about policy-briefs conception and appropriation: critical analysis, analysis of transferability and practical examples             | 1, 2, 3                  |
| Organisation of a regular meeting between stakeholders and researchers, to discuss about research production and field needs, in order to be aware of issues of both parts | 1, 2                     |
| Diffusion of policy-briefs in the ARS                                                                                                                                      | 1, 2, 3, 4               |
| Redaction by the IREPS of notes based on PBS data and/or other evidence data or theoretical models in the call for proposals and conventions: political memo               | 2, 3, 4                  |
| To make official the collaboration between the ARS and the university research group “human health” (convention, charter, ...)                                             | 2, 3, 4                  |
| Diffusion of communication tools (newsletters, inserts, etc.) that highlight research results                                                                              | 4                        |
| Presentation of the process in the ARS: meetings with the director general, the executive committee, the management committee, etc.                                        | 4                        |
| Political memo for the director general                                                                                                                                    | 4                        |

**Expected outcomes :**

- 1: ARS professionals enhance PBS data in the documents, tools, etc. they produce (e.g. presentations, actions assessment, activities scheme, etc.)
- 2: Evidence (including PBS) requirement appears in the regional calls for projects
- 3: ARS professionals indicate evidence (including PBS) requirement in the conventional agreement they have with stakeholders
- 4: ARS teams adopt a shared culture on evidence use.

| Activities to implement with stakeholders and expected outcomes                                                                                                        |                          |
|------------------------------------------------------------------------------------------------------------------------------------------------------------------------|--------------------------|
| <i>Activities</i>                                                                                                                                                      | <i>Expected Outcomes</i> |
| Formation for stakeholders on evidence use and its adding value (Level 1)                                                                                              | 1, 2, 3                  |
| Formation for stakeholders on evidence use in relation with identified needs previously collected (for example according to a given population, theme, etc.) (Level 2) | 1, 2, 3                  |
| Methodological support for evidence use                                                                                                                                | 1, 2                     |
| Diffusion of communication tools (newsletters, inserts, etc.) that highlight research results and PBS                                                                  | 1, 2                     |
| Deliberative working group in order to develop a policy-brief for field professionals working in prevention and health promotion                                       | 1, 2, 3                  |
| Reflexive working groups/journal clubs about policy-briefs conception and appropriation: critical analysis, analysis of transferability and practical examples         | 1, 2, 3                  |

**Expected outcomes :**

- 1: Stakeholders use PBS data when applying to calls for projects as well as in the actions funded on pluri-annual conventions they develop
- 2: Stakeholders use PBS data when developing their projects
- 3: Proximity advisors are able to help stakeholders with evidence use

| Activities to implement with CRSA professionals and expected outcomes                                                 |                          |
|-----------------------------------------------------------------------------------------------------------------------|--------------------------|
| <i>Activities</i>                                                                                                     | <i>Expected Outcomes</i> |
| Installation of awareness areas for evidence use among board, committee's presidents and prevention committee members | 1, 2                     |
| Diffusion of policy briefs whose topics are in relation with the agenda of the prevention committee of the CRSA       | 1, 2                     |
| Diffusion of policy briefs whose topics are in relation with the agenda prevention of the CRSA plenary meetings       | 1, 2                     |

**Expected outcomes :**

- 1: CRSA members adopt a shared culture on evidence use.
- 2: CRSA members include PBS data in the notices they deliver

KT: Knowledge transfer; IREPS: Instance Régionale d'Education et de Promotion de la Santé, Regional Authority of education and health promotion; ARS: Agence Régionale de santé, Regional health agency; CRSA: Conférence Régionale de la Santé et de l'autonomie - an advisory organism involved in regional health politics set up; PBS: Stratégies d'Intervention en Prévention, knowledge documents named "intervention strategies in prevention".
